# Supplementary material
Source: publisher figshare collection journal article supplement (https://acs.figshare.com/ndownloader/files/6332379)
Supplement: Supplementary file 1 [file 6332379]

# Mild and selective mono-iodination of unprotected peptides as initial step for the synthesis of bioimaging probes

Romain Bertrand,<sup>†</sup> Michael Wagner,<sup>†</sup> Volker Derdau,<sup>†,\*</sup> and Oliver Plettenburg<sup>†,‡,§,\*</sup>

<sup>†</sup> Research & Development, Integrated Drug Discovery, Sanofi-Aventis Deutschland GmbH, Frankfurt am Main, 65926, Germany

<sup>‡</sup> Leibniz Universität Hannover, Schneiderberg 1B , 30167 Hannover, Germany

<sup>§</sup> Institute of Medicinal Chemistry, Helmholtz Zentrum München GmbH, German Research Center for Environmental Health, Ingolstädter Landstr. 1, 85764 Neuherberg, Germany

\* Email: [Volker.Derdau@sanofi.com](mailto:Volker.Derdau@sanofi.com); [Oliver.Plettenburg@helmholtz-muenchen.de](mailto:Oliver.Plettenburg@helmholtz-muenchen.de)

## Supporting Information

### Table of Contents

**Figures S1** Preparation of the iodination stock solution (p.2)

**Figures S2** Iodination reaction occurs quickly at room temperature (p.3)

**Figures S3** Iodination is specific to tyrosine residue (p.4)

**Figures S4** Mono-iodination of a methionine containing peptide: [Tyr<sup>8</sup>]-Substance P (p.7)

**General methods** (p.9)

**Peptide mono-iodination** (p.13)

**NMR Spectra and proton assignment of mono-iodinated peptides** (p.42)

**Supporting References** (p.70)

### Figure S1 – Iodination stock solution preparation

Iodination stock solution 50 mM in acetonitrile was prepared freshly. Selectfluor (15 mg, 42.3  $\mu\text{mol}$ ) was dissolved in 840  $\mu\text{L}$  of acetonitrile by vigorous vortexing (solution **A**) followed by NaI (6.8 mg, 45.3  $\mu\text{mol}$ ). The addition of sodium iodide was easily visible by change in color: the transparent Selectfluor solution turned into a brown caramel mixture after 10 seconds (solution **B**).

Upon addition of the iodination stock solution to Tyr-peptides dissolved in DCM + 20% TFA (solution **C**), the reaction mixture turned light pink (solution **D**).

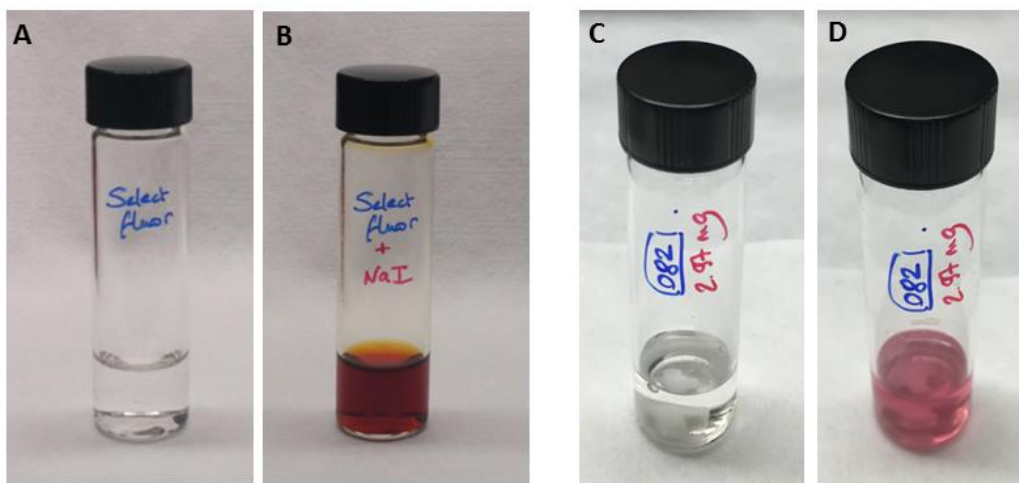

### Figure S2 – Iodination reaction occurs quickly at room temperature

Ac-Tyr-NH-Me (2.0 mg, 8.5  $\mu$ mol) was dissolved in 1 mL of DCM + 10% TFA. Then was added dropwise 1.1 eq of a 50 mM freshly prepared iodination stock solution. Reaction was allowed to stir at room temperature and monitored by LC-MS after 15 minutes and after 2 hours. No difference was observed. Analytical LC-MS chromatograms are shown below:

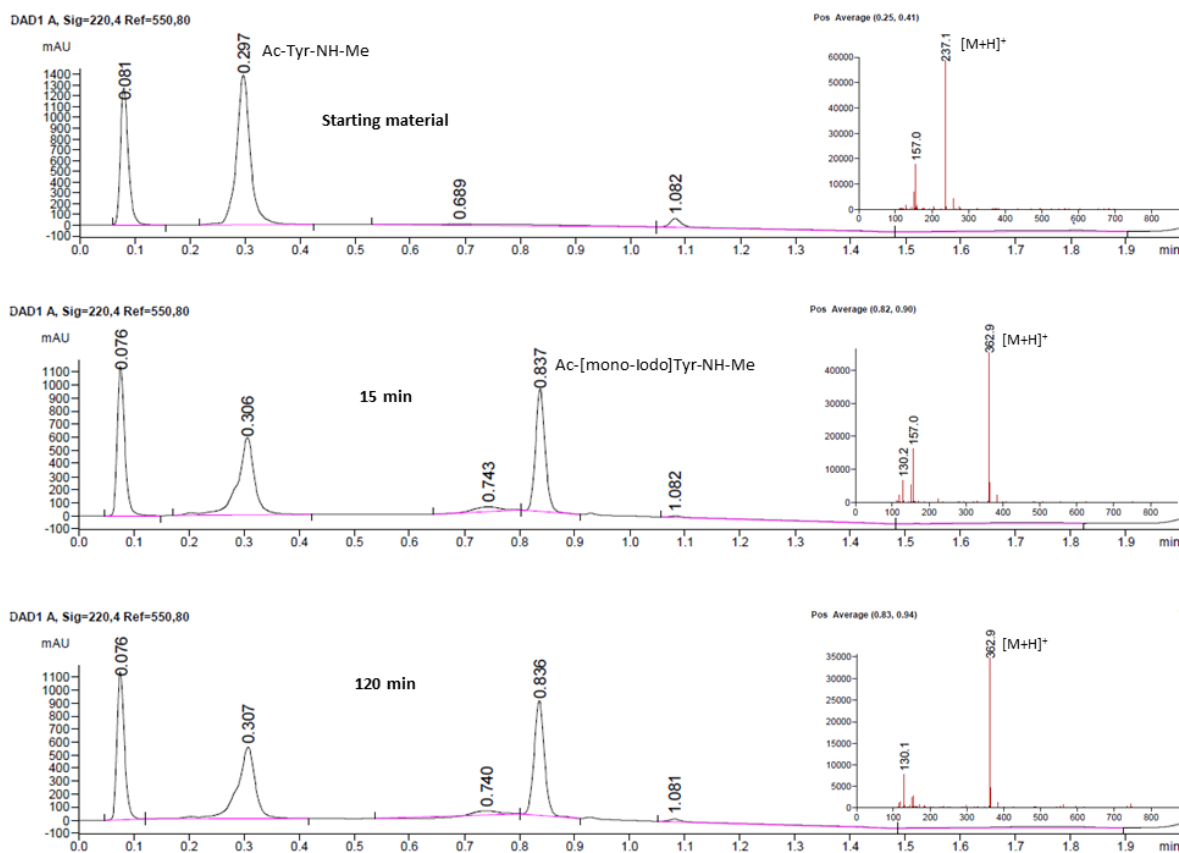

### Figure S3 – Iodination is specific to Tyr residue

Ac-Tyr-NH-Me (2.0 mg, 8.5  $\mu$ mol), Ac-Phe-Tyr-NH-Me, Ac-Phe-His-NH-Me and Ac-Phe-Trp-NH-Me were respectively dissolved in 1 mL of DCM + 10% TFA. Then was added dropwise 1.1 eq of a 50 mM freshly prepared iodination stock solution. Reaction was allowed to stir at room temperature and monitored by LC-MS after 2 minutes and after 15 minutes. Under these conditions, iodination proceeded only on Tyr residues. Analytical LC-MS chromatograms are shown below:

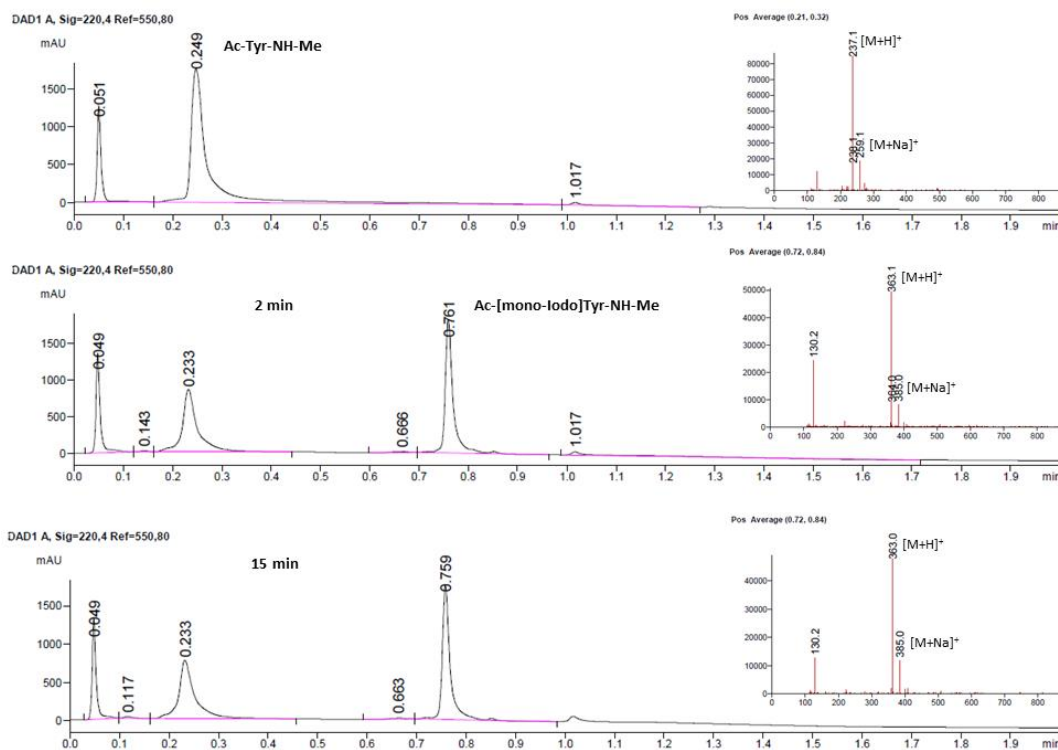

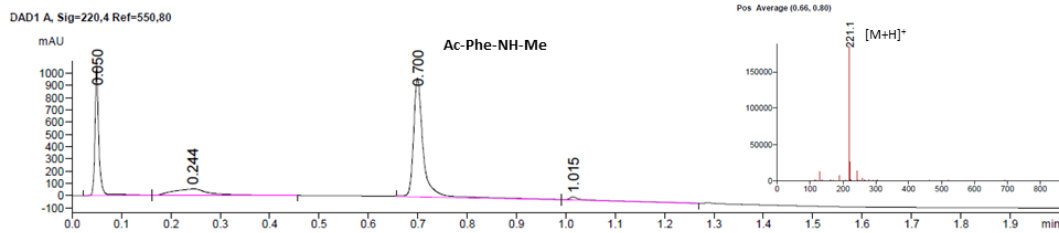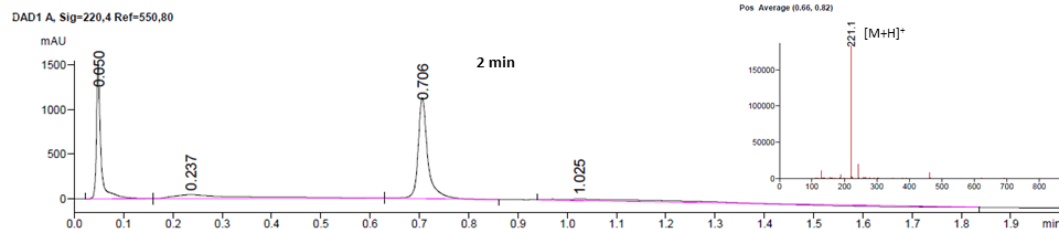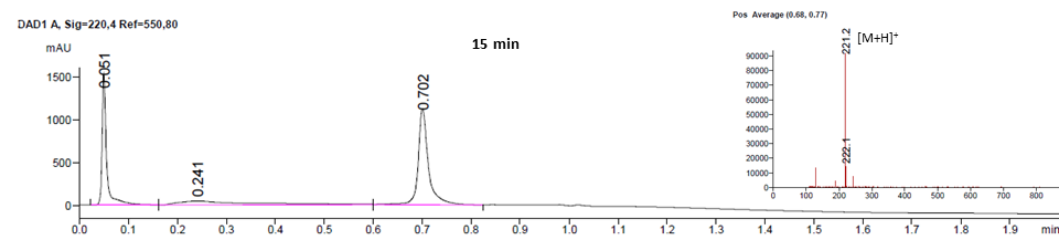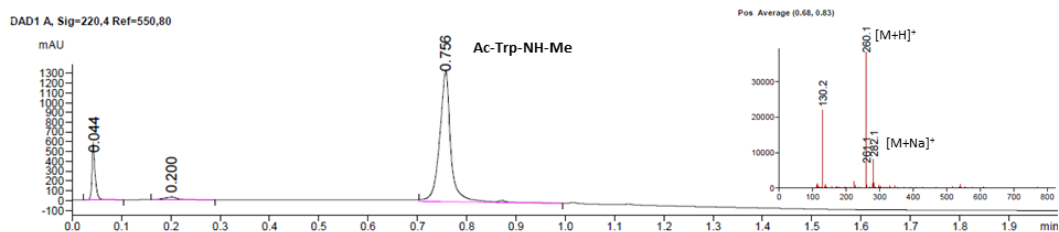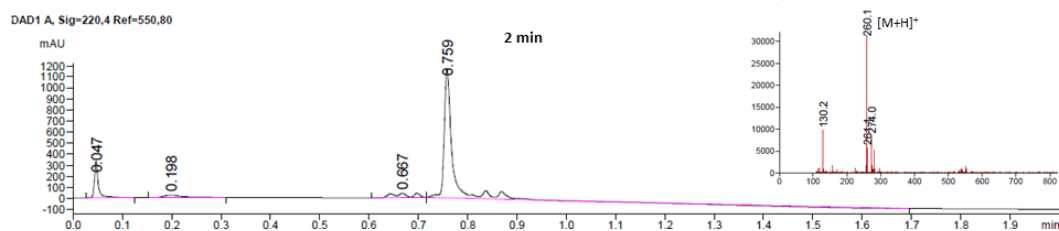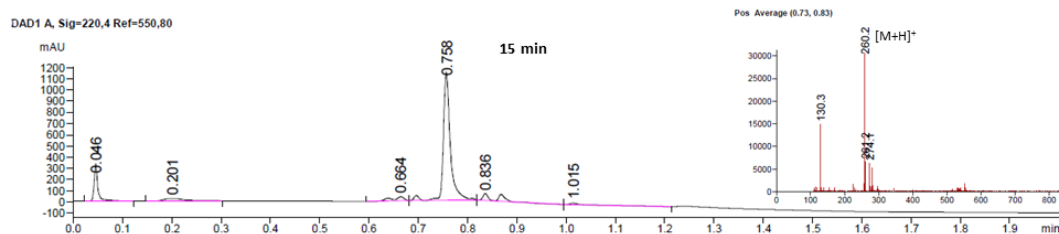

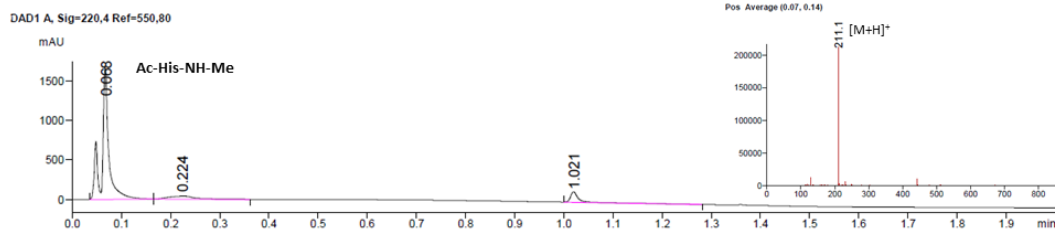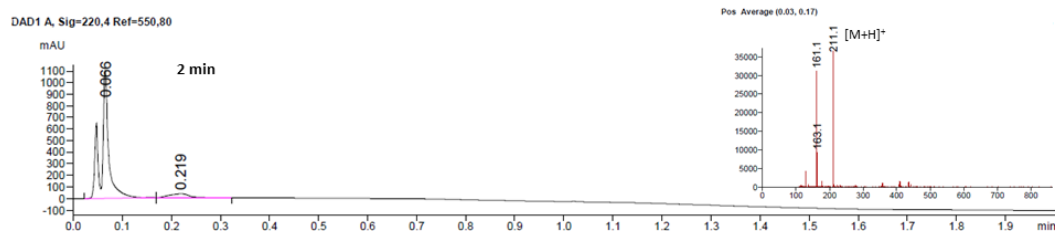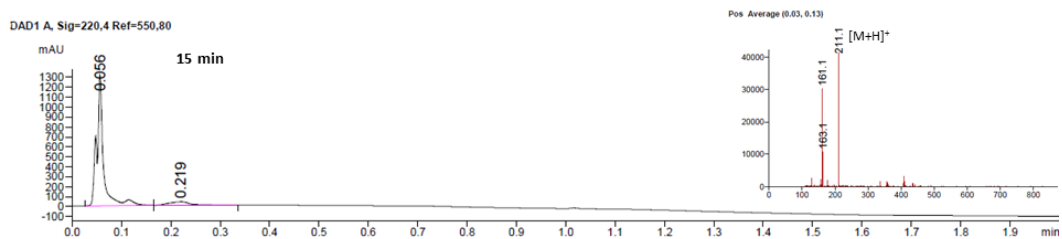

### Figure S4 – Mono-iodination of a Met-containing peptide: [Tyr<sup>8</sup>]-Substance P

[Tyr<sup>8</sup>]-Substance P (0.81 mg, 0.59  $\mu$ mol) was dissolved in 340  $\mu$ L of DCM and 80  $\mu$ L of TFA. Then were added dropwise 16  $\mu$ L (1.4 eq.) of a 50 mM freshly prepared iodination stock solution. Reaction was allowed to stir at room temperature and monitored by LC-MS. A mixture containing the SM, the starting material with the oxidized methionine SM[Ox], and the MI. Addition of 4  $\mu$ L (0.35 eq.) of a 50 mM iodination stock solution generated the oxidized methionine mono-iodinated compound MI[Ox]. Two other successive additions of 4  $\mu$ L (3x 0.35 eq.) of a 50 mM iodination stock solution afforded MI and MI[Ox] as the major product. Finally, addition of 100  $\mu$ L of the reducing cocktail (freshly prepared: potassium iodide KI (10 mg) and ascorbic acid (10 mg) were sonicated in 500  $\mu$ L of TFA for 10 minutes) enabled reduction of MI[Ox] towards MI. Analytical LC-MS chromatograms are shown below:

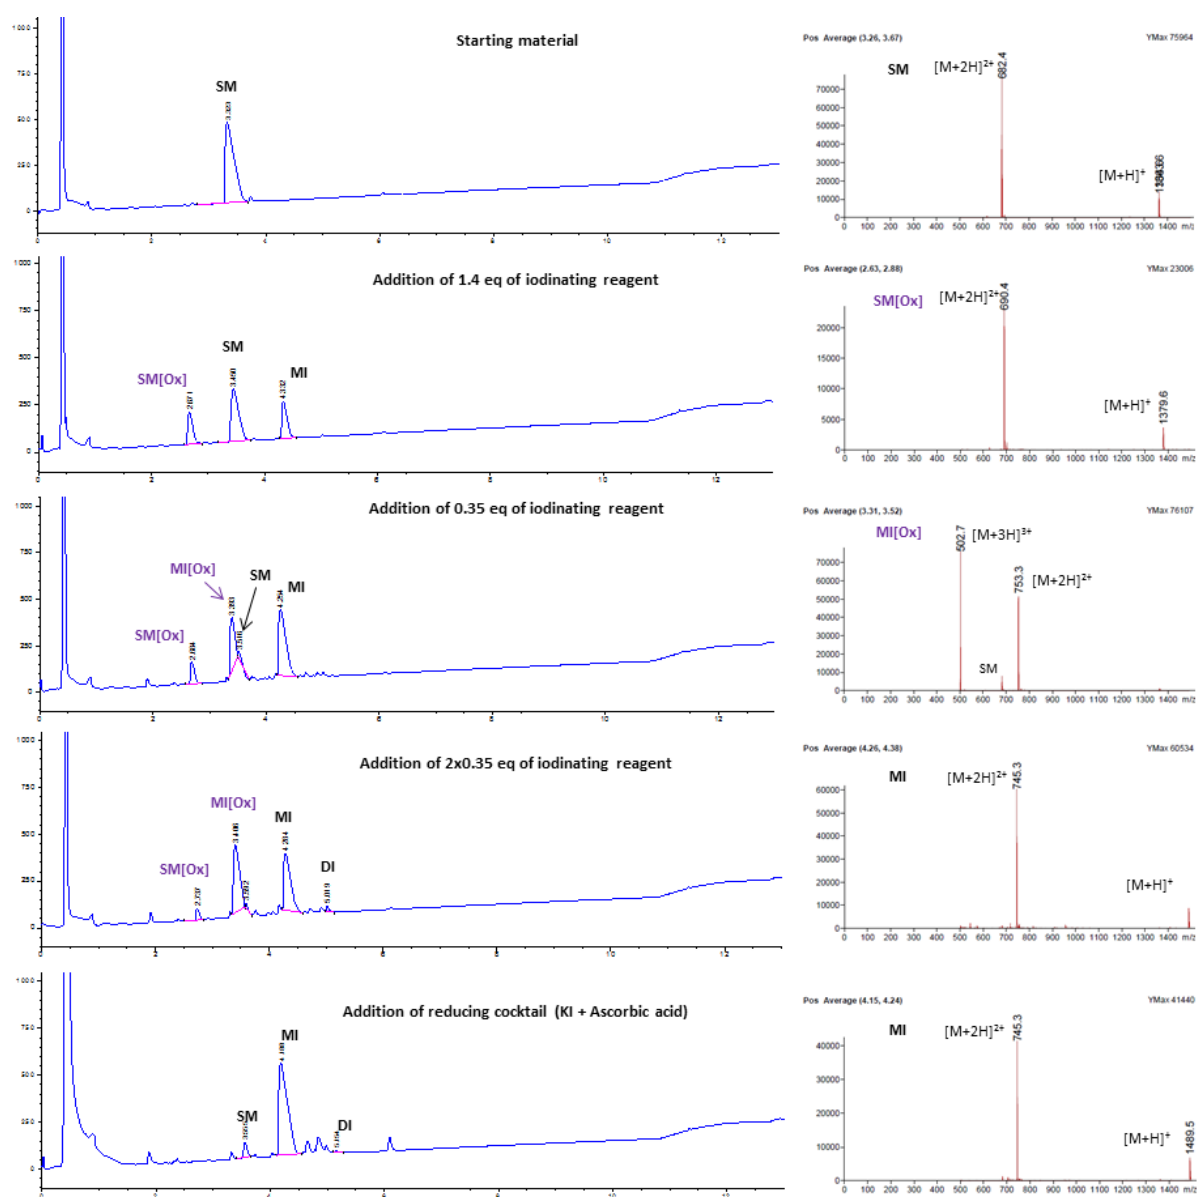

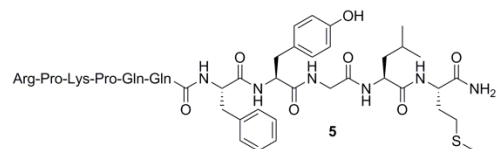

Selectfluor + NaI  
DCM + 20% TFA  
rt, 15 min

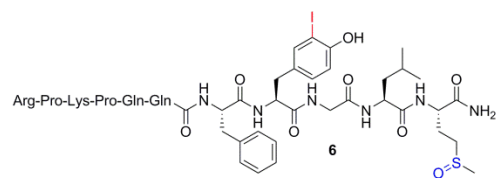

Reducing cocktail  
KI + ascorbic acid  
rt, 5 min

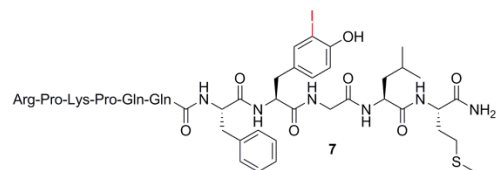

**[Tyr<sup>8</sup>]-Substance P**

SM: 5.9% / MI: 93.6% / DI: 0.5%  
2.2  $\mu$ mol - yield 72%



## General methods

Unless otherwise noted, all reagents and solvents were purchased from commercial suppliers (Sigma Aldrich, ThermoFisher, Merck Millipore) and used without further purification.

Reactions were monitored by LC-MS. For small molecules: data were acquired using the Agilent 1100 MSD system with a Phenomenex Luna column (C-18, 100Å pore size, 3 µm particle size, 10x2.0 mm, flow: 1.1 mL/min). Gradient: 0 min 1% ACN (+0.05% TFA) / 99% H<sub>2</sub>O (+0.05% TFA); 0.3 min % ACN (+0.05% TFA); 1.3 min 95% ACN (+0.05% TFA); 1.75 min 1% ACN (+0.05% TFA); 1.80 min 1% ACN (+0.05% TFA). Mass detection range: 110-1000MW. Temperature: 30 °C. For peptides: data were acquired using the Agilent 1100 MSD system with a Phenomenex Aeris Widepore column (XB-C18, 200Å pore size, 3.6 µm particle size, 100x2.1 mm, flow: 0.5 mL/min). Gradient: 0 min 5% ACN (+0.1% formic acid) / 95% H<sub>2</sub>O (+0.1% formic acid) to 10 min - 50% ACN (+0.1% formic acid); 11 min 90% ACN (+0.1% formic acid) to 12.5 min; 12.5 min to 13.5 min 5% ACN (+0.1% formic acid). Mass detection range: 500-1500MW. Temperature: 38°C.

Purifications on reverse-phase preparative HPLC were performed on the HP-Agilent 1100 with either i) a column from Agilent (Zorbax Rx C18, 5 µm particle size, 250x9.4mm, flow: 4 mL/min). Gradient: 0 min to 5 min 10% ACN (+0.1% TFA) / 90% H<sub>2</sub>O (+0.1% TFA); 5 min to 30 min 95% ACN (+0.1% TFA) / 5% H<sub>2</sub>O (+0.1% TFA); 30 min to 32 min 95% ACN (+0.1% TFA) / 5% H<sub>2</sub>O (+0.1% TFA); 32 min to 35 min 10% ACN (+0.1% TFA) / 90% H<sub>2</sub>O (+0.1% TFA) or ii) a column from Waters (Xbridge Prep C18 OBD, 5 µm particle size, 250x19mm, flow: 16 mL/min). Gradient: 0 min to 5 min 10% ACN (+0.1% TFA) / 90% H<sub>2</sub>O (+0.1% TFA); 5 min to 30 min 95% ACN (+0.1% TFA) / 5% H<sub>2</sub>O (+0.1% TFA); 30 min to 32 min 95% ACN (+0.1% TFA) / 5% H<sub>2</sub>O (+0.1% TFA); 32 min to 35 min 10% ACN (+0.1% TFA) / 90% H<sub>2</sub>O (+0.1% TFA) or iii) a column from Waters (Acquity UPLC CSH C18, 130Å pore size, 1.7 µm particle size, 2.1x150mm, flow: 0.5 mL/min). Gradient: 0 min to 3 min 20% ACN (+0.05% TFA) / 80% H<sub>2</sub>O (+0.05% TFA); 3 min to 23 min 75% ACN (+0.05% TFA) / 25% H<sub>2</sub>O (+0.05% TFA); 23 min to 23.5 min 95% ACN (+0.05% TFA) / 5% H<sub>2</sub>O (+0.05% TFA). 23.5 min to 25.5 min 95% ACN (+0.05% TFA) / 5% H<sub>2</sub>O (+0.05% TFA). Temperature: 50 °C.

Purification on silica gel chromatography was performed on CombiFlash Rf-Isco Teledyne.

Final peptides were analyzed by UPLC-MS Waters Acquity (C-18 CSH column - 130Å pore size, 1.7 µm particle size, 150x2.1 mm, flow: 0.5 mL/min – Gradient 1: 0 min 10% ACN (+0.1% formic acid) / 90% H<sub>2</sub>O (+0.1% formic acid) to 19.2 min - 90% ACN (+0.1% formic acid); 20 min 90% ACN (+0.1% formic acid). Gradient 2: 0 min 2% ACN (+0.1% formic acid) / 98% H<sub>2</sub>O (+0.1% formic acid) to 9.12 min - 40% ACN (+0.1% formic acid); 12 min 40% ACN (+0.1% formic acid). Mass detection range: 500-2000MW.

Temperature: 40 °C. High resolution mass HRMS were recorded on the Agilent 6200 Series Accurate-Mass Time-of-flight (TOF). <sup>1</sup>H and <sup>13</sup>C NMR spectra were recorded on a Bruker DRX-400 or 600 systems in d<sub>6</sub>-DMSO or CDCl<sub>3</sub>. Chemical shifts are given in parts per million (ppm) with tetramethylsilane as an internal standard. Abbreviations are used as follows: s = singlet, d = doublet, t = triplet, q = quartet, p = pentet, m = multiplet or unresolved, dd = doublets of doublet, br = broad. Coupling constants (*J* values) are given in Hertz (Hz). Absorption and Emission spectra were acquired with a Thermo Varioskan using the SkanIt 2.4.3 software.

### Abbreviations

ACN = acetonitrile  
AUC = area under the curve  
Boc = *tert*-butyloxycarbonyl  
DCM = dichloromethane  
DI = di-iodinated product  
DIEA = N,N-diisopropylethylamine  
DMF = dimethylformamide  
DODT = 3,6-Dioxa-1,8-octane-dithiol  
ESI-TOF = electrospray ionization mass spectrometry – time of flight  
EtOAc = ethyl acetate  
Hept = heptane  
HE-SPPS = high-efficiency solid phase peptide synthesis  
HPLC = high performance liquid chromatography  
HRMS = high resolution mass spectrometry  
LC-MS = liquid chromatography - mass spectrometry  
MI = mono-iodinated product  
NMR = nuclear magnetic resonance  
PEG = poly-ethylene glycol  
SM = starting material  
tBuOH = tert-butanol  
TFA = trifluoroacetic acid  
THPTA = tris(3-hydroxypropyltriazolymethyl)amine  
TIS = triisopropylsilane  
UPLC-MS = ultra-performance liquid chromatography - mass spectrometry

### Peptides

Tocinoic acid, Goserelin acetate and [Tyr<sup>8</sup>]-Substance P were purchased from Sigma Aldrich. Cyclo(RGGyK) was purchased from Selleckchem. AcMeYVAD-CHO, [Tyr<sup>0</sup>]-Bradykinin, and human GLP-1 (7-37) were purchased from Bachem.

### HE-SPPS

Leucin-Enkephalinamide, Angiotensin III and ACP fragment (65-74) were synthesized by High-Efficiency Solid Phase Peptide Synthesis<sup>1</sup> using a CEM Liberty Blue system on a 0.1 mmol scale with a Rink Amide AM resin low loading (0.29 mmol/g) 100-200 mesh from Novabiochem using 5-fold excess of reagents [0.2 M Fmoc amino acid solution (in DMF) with 0.5 M DIC (in DMF) and 1.0 M Oxyma (in DMF)] and 20% piperidine in DMF for the Fmoc-deprotection cycles. Immediately after synthesis, the peptide resin was washed three times with 10 mL of DMF and then three times with 10 mL of DCM. Cleavage was then performed in all cases with 10 mL of a freshly prepared King's cocktail (TFA 82.5% / Phenol 5% / Thioanisole 5% / H<sub>2</sub>O 5% / DODT 2.5%) for 3 hours before being precipitated in 70 mL of ice cold diisopropyl ether. Precipitate was centrifuged (4 min, 4000 rpm, 4 °C) and washed with ice cold diisopropyl ether three times. Finally, the resin was filtered off and the peptide precipitate was dissolved

in H<sub>2</sub>O + 25% ACN + 0.5% AcOH and lyophilized. Crude purity was > 95% for Leucin-Enkephalinamide. Angiotensin III and ACP fragment (65-74) were purified with reverse-phase preparative HPLC.

### Solvent screening for Ac-Tyr-NH-Me mono-iodination

Ac-Tyr-NH-Me (2.0 mg, 8.5  $\mu$ mol) was dissolved in 1 mL of different solvents (indicated in Table 1). Then was added dropwise 1.1 eq of a 50 mM freshly prepared iodination stock solution. Reaction was allowed to stir at room temperature and monitored by LC-MS instantly after addition of iodination solution, and after 15 minutes. Relative amounts of SM, MI, and DI shown in Table 1 were quantified using AUC integration (absorbance at 220 nm). Analytical LC-MS chromatograms are shown below:

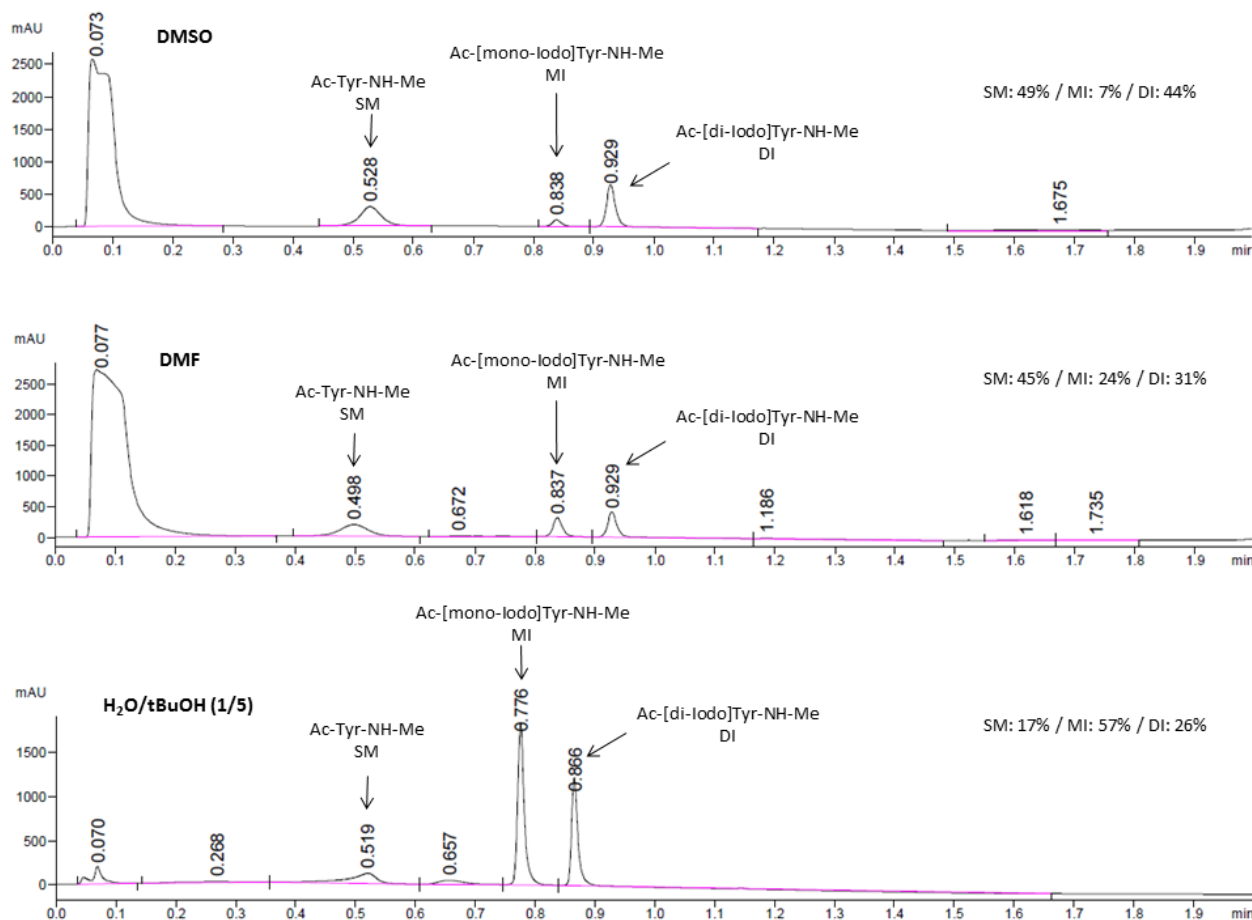

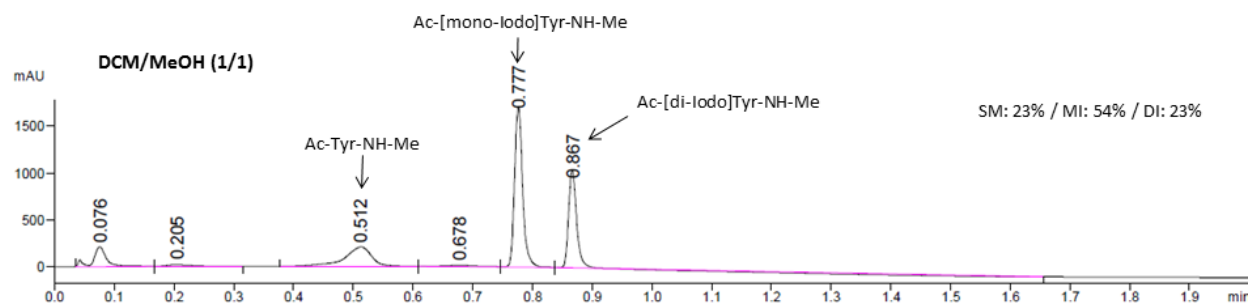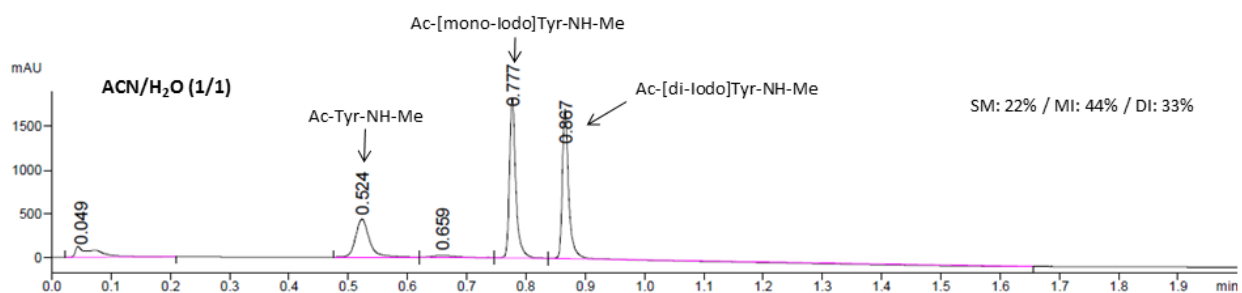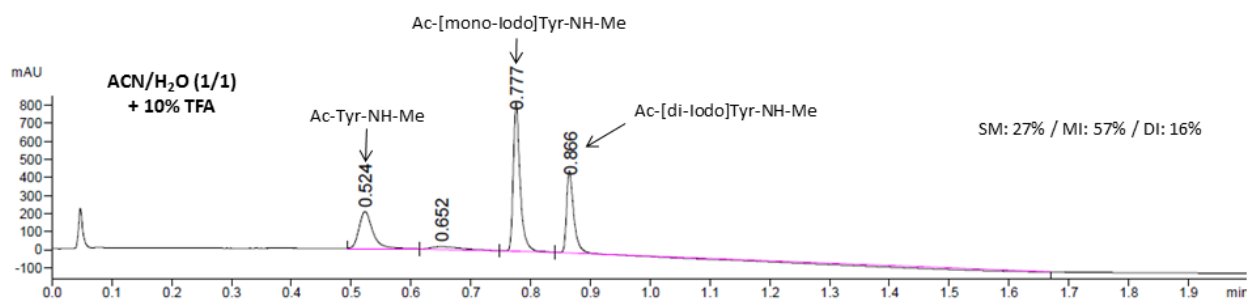

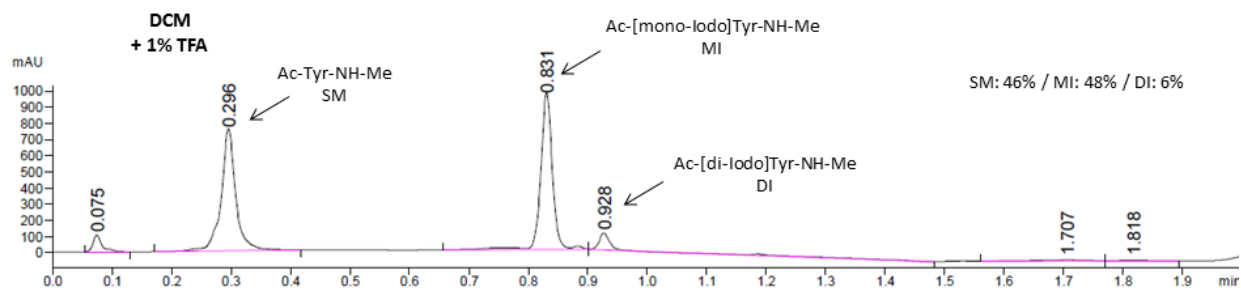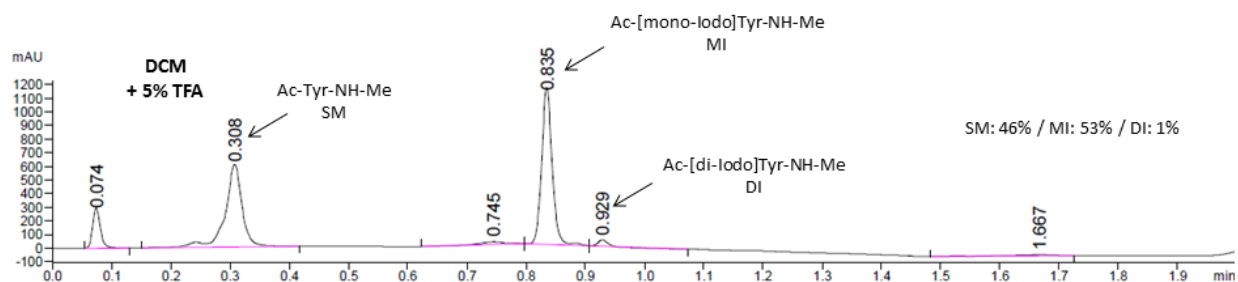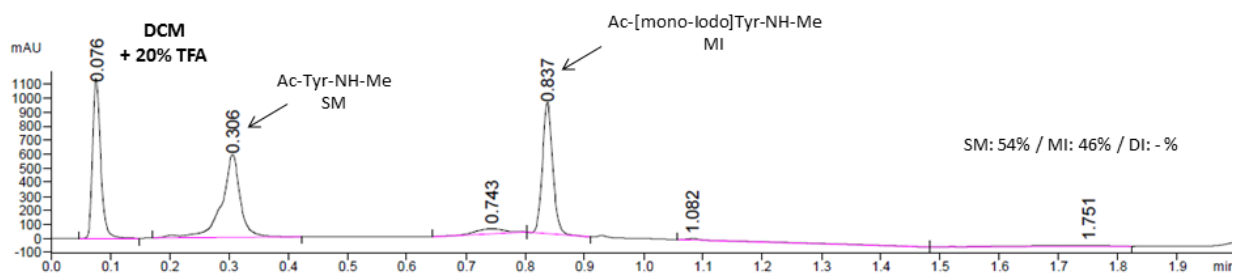

### General Mono-iodination procedure

Tyr-containing peptide was dissolved in DCM+ 20% TFA at a concentration of 1-2 mM. Then were added dropwise 1.4 eq of a 50 mM freshly prepared iodination stock solution. Reaction was allowed to stir at room temperature for 15 minutes and was monitored by LC-MS as followed: 10  $\mu$ L of the reaction mixture were quenched with 20  $\mu$ L of distilled water which were submitted to analysis. Depending on the conversion, extra 0.25 eq of iodination stock solution were added sequentially to reach the described ratio of starting material (SM), mono-iodinated product (MI) and di-iodinated product (DI) in Scheme 2. Relative amounts of SM, MI and DI were quantified using AUC integration (absorbance at 215 nm) corresponding to their respective masses. Analytical LC-MS chromatograms are shown below:

#### Cyclo(RGD[mono-iodo]yK)

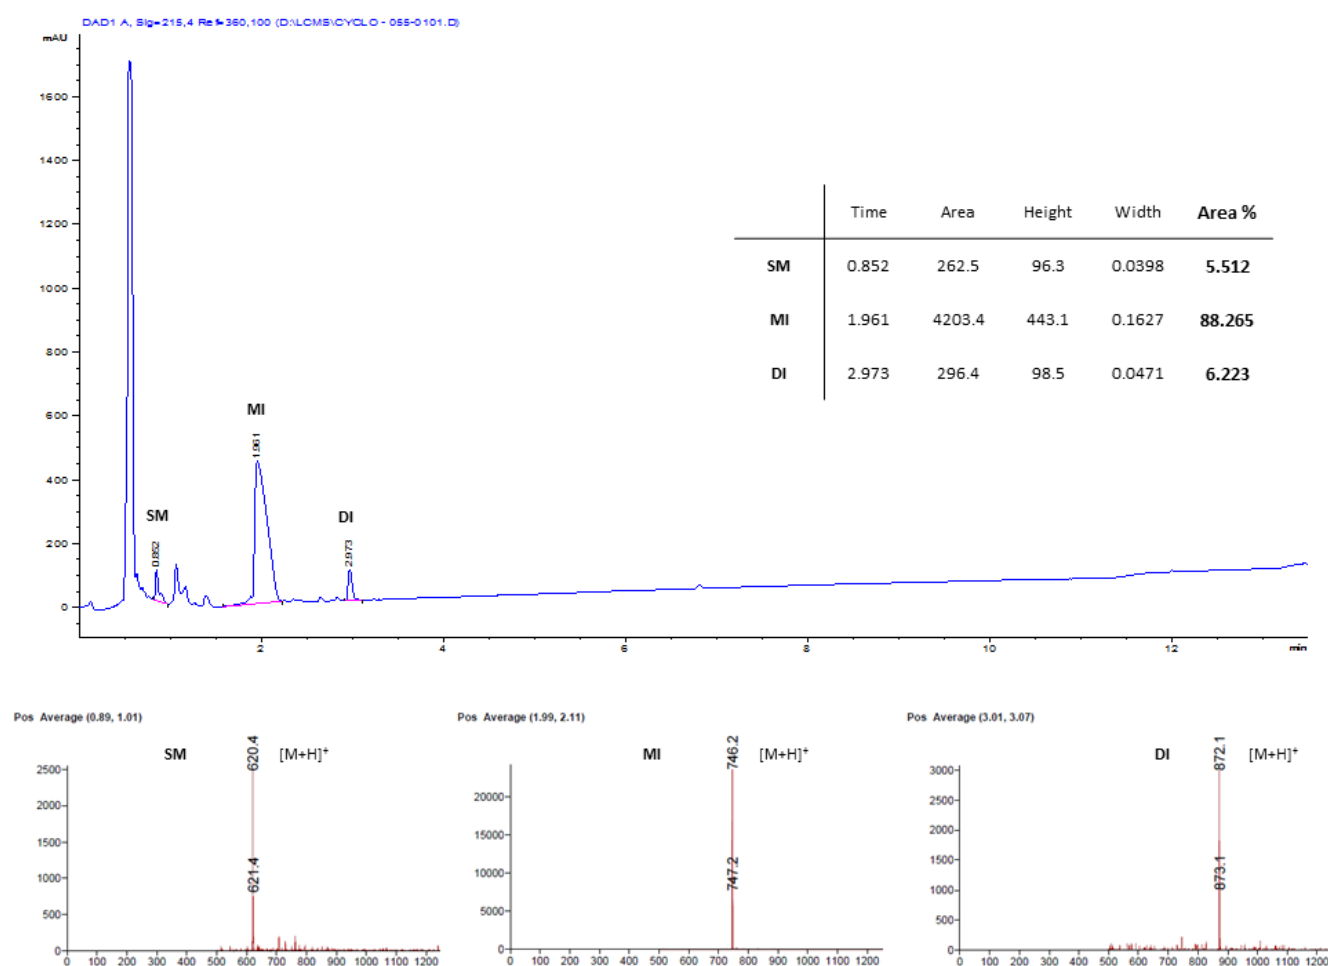

# Leucin-Enkephalinamide

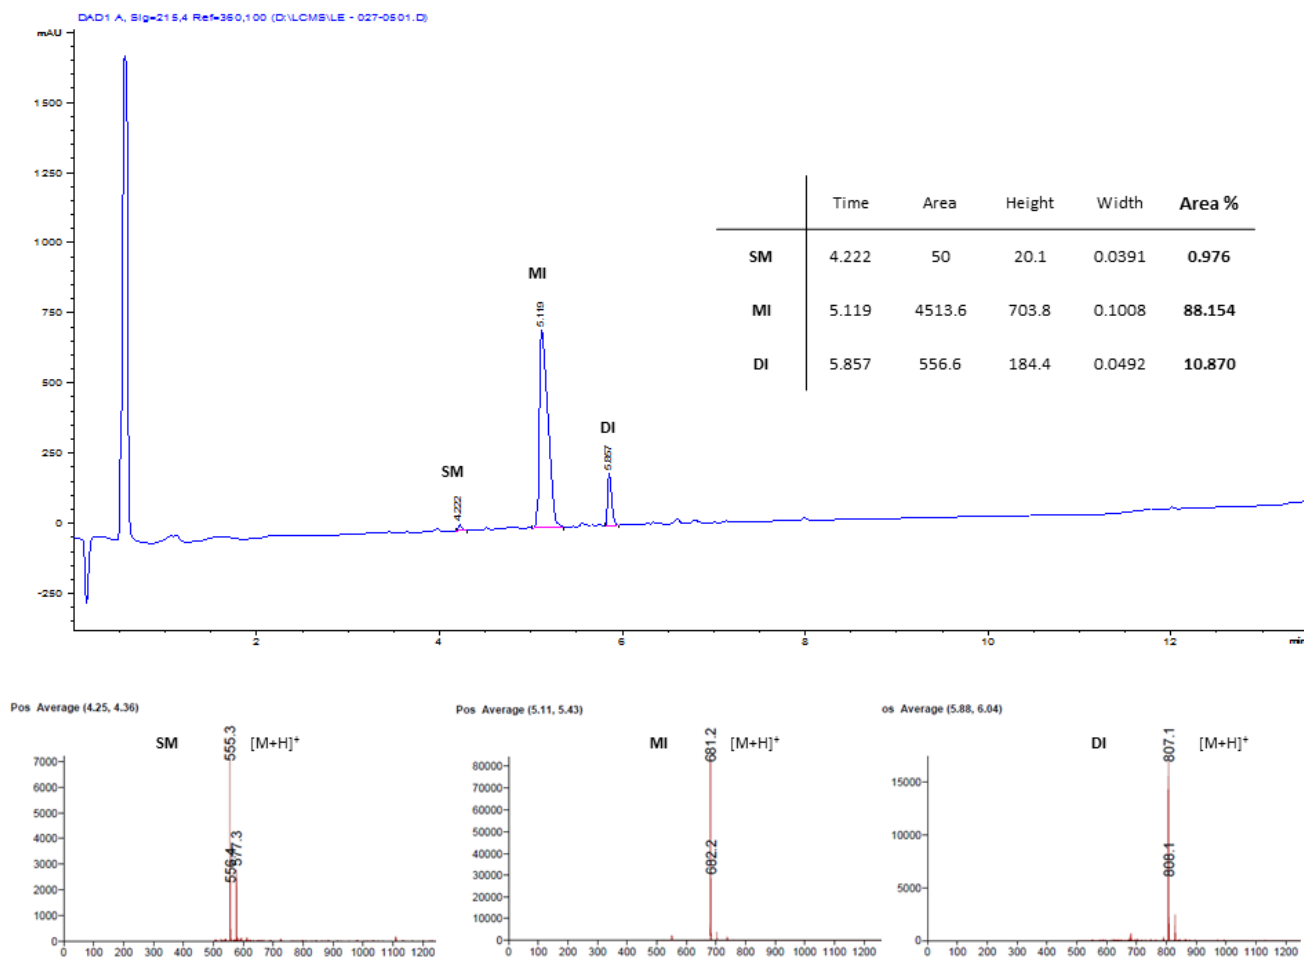

# Goserelin

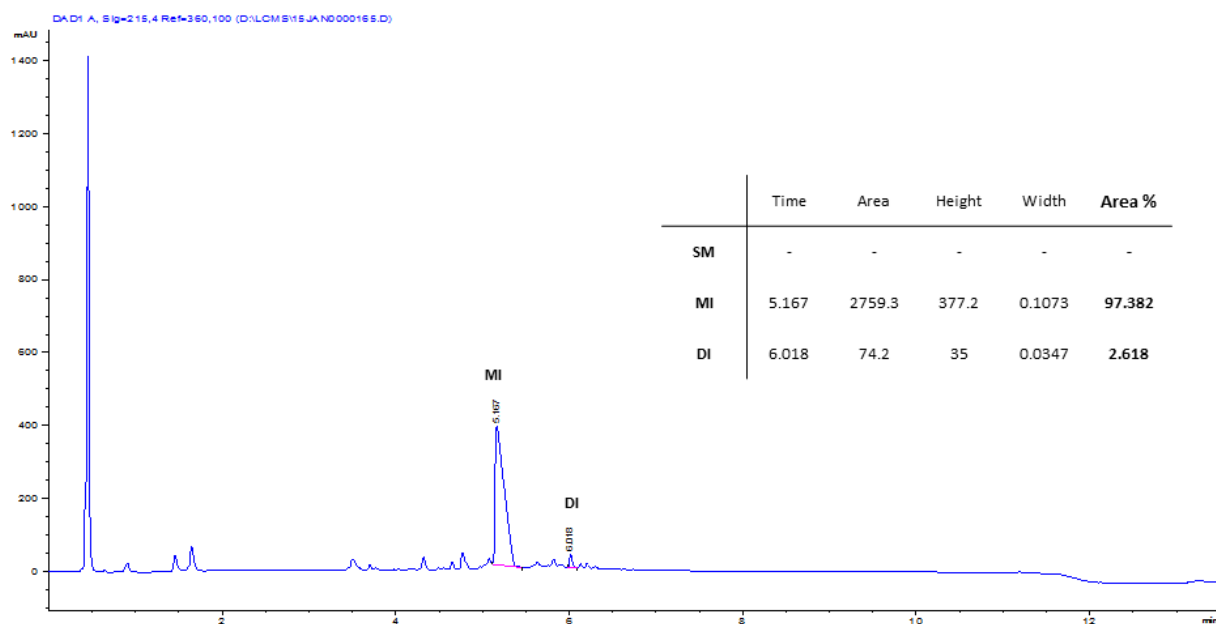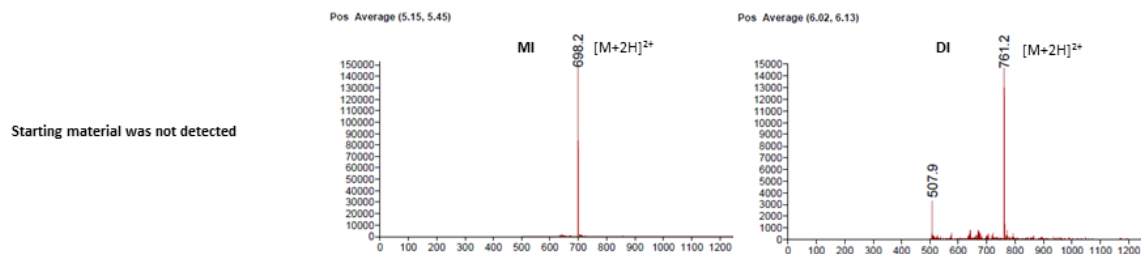



# [Tyr<sup>0</sup>]-Bradykinin

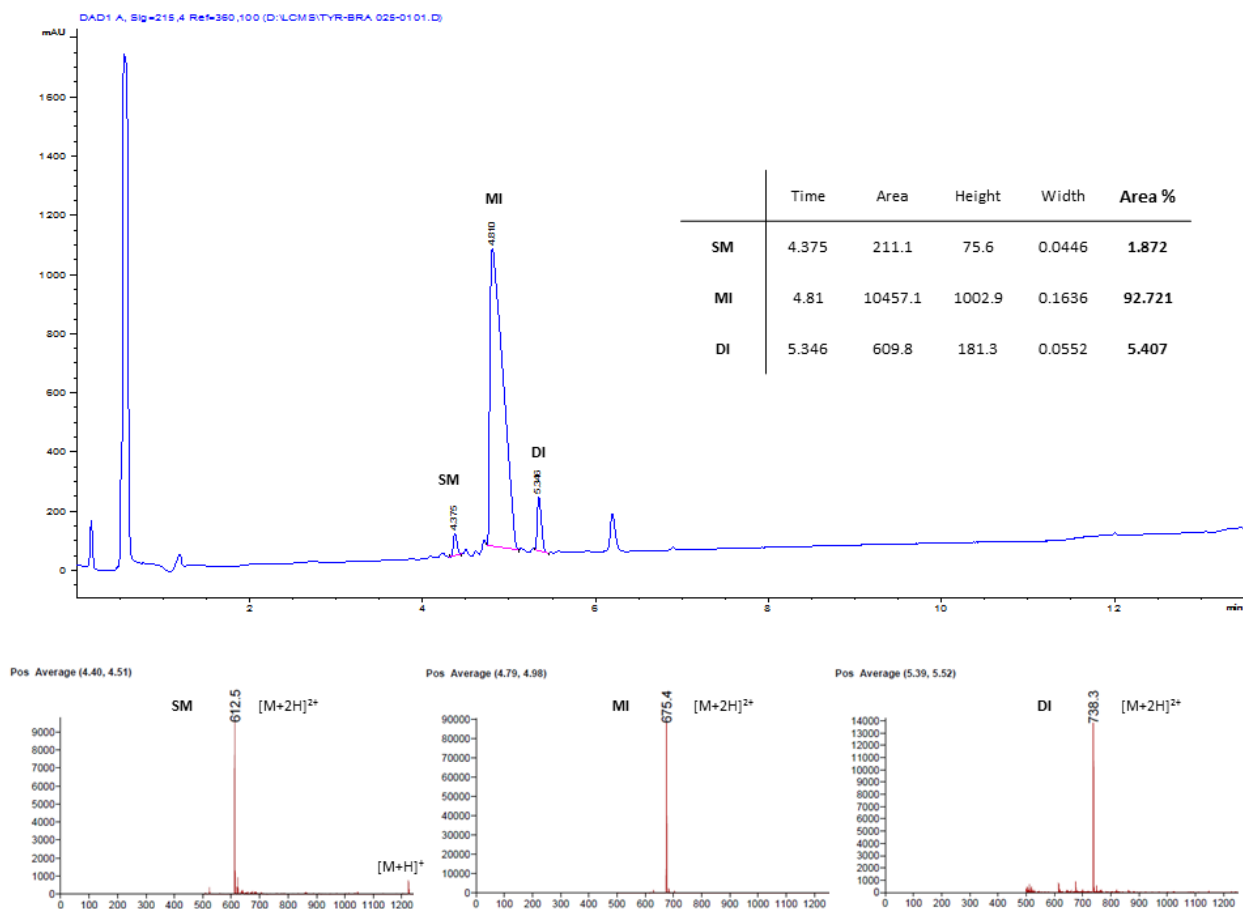

# Angiotensin III

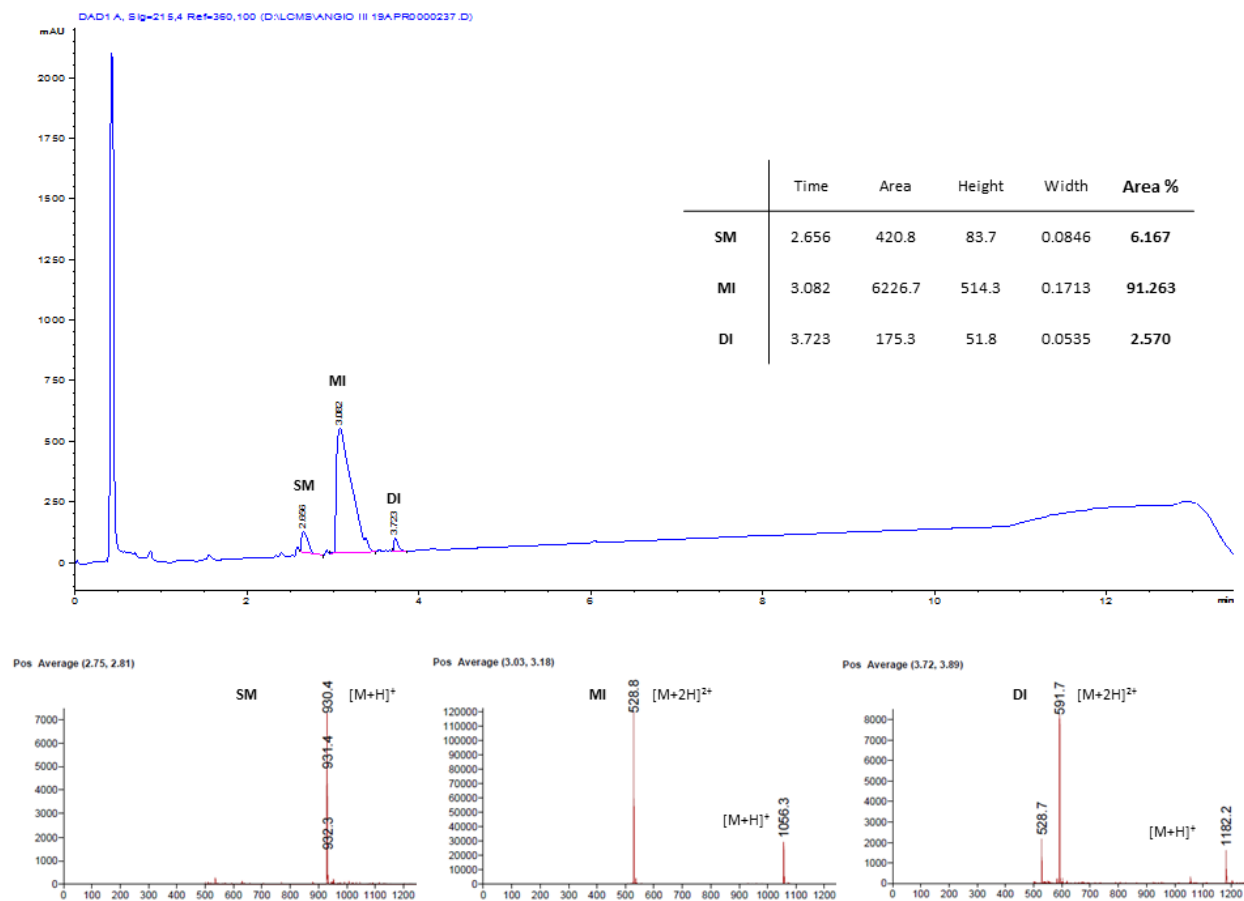

ACP fragment (65-74)

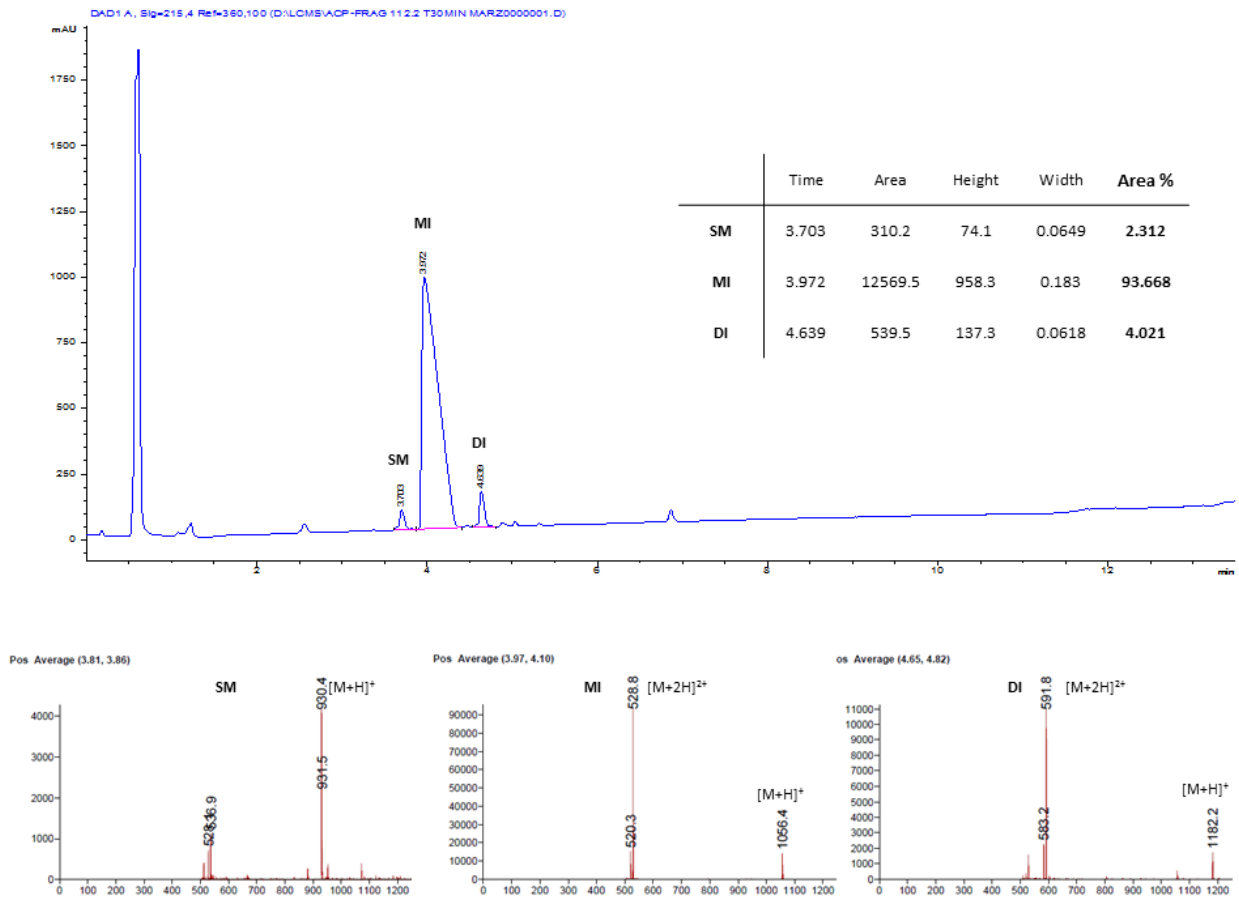

AcMeYVAD-CHO

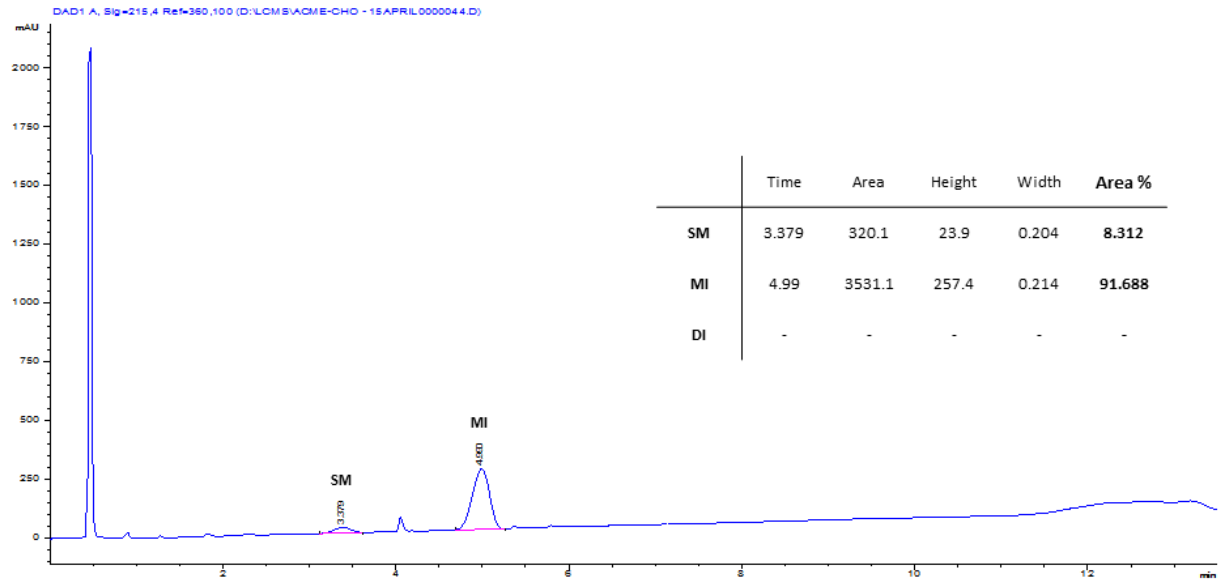

Pos Average (3.33, 3.41)

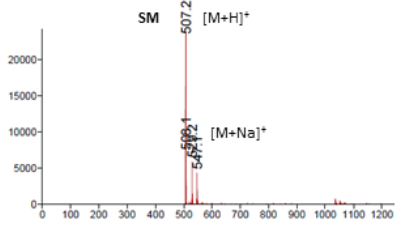

Pos Average (4.99, 5.04)

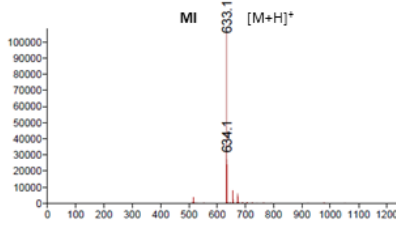

Di-iodinated product was not detected

Tocinoic acid

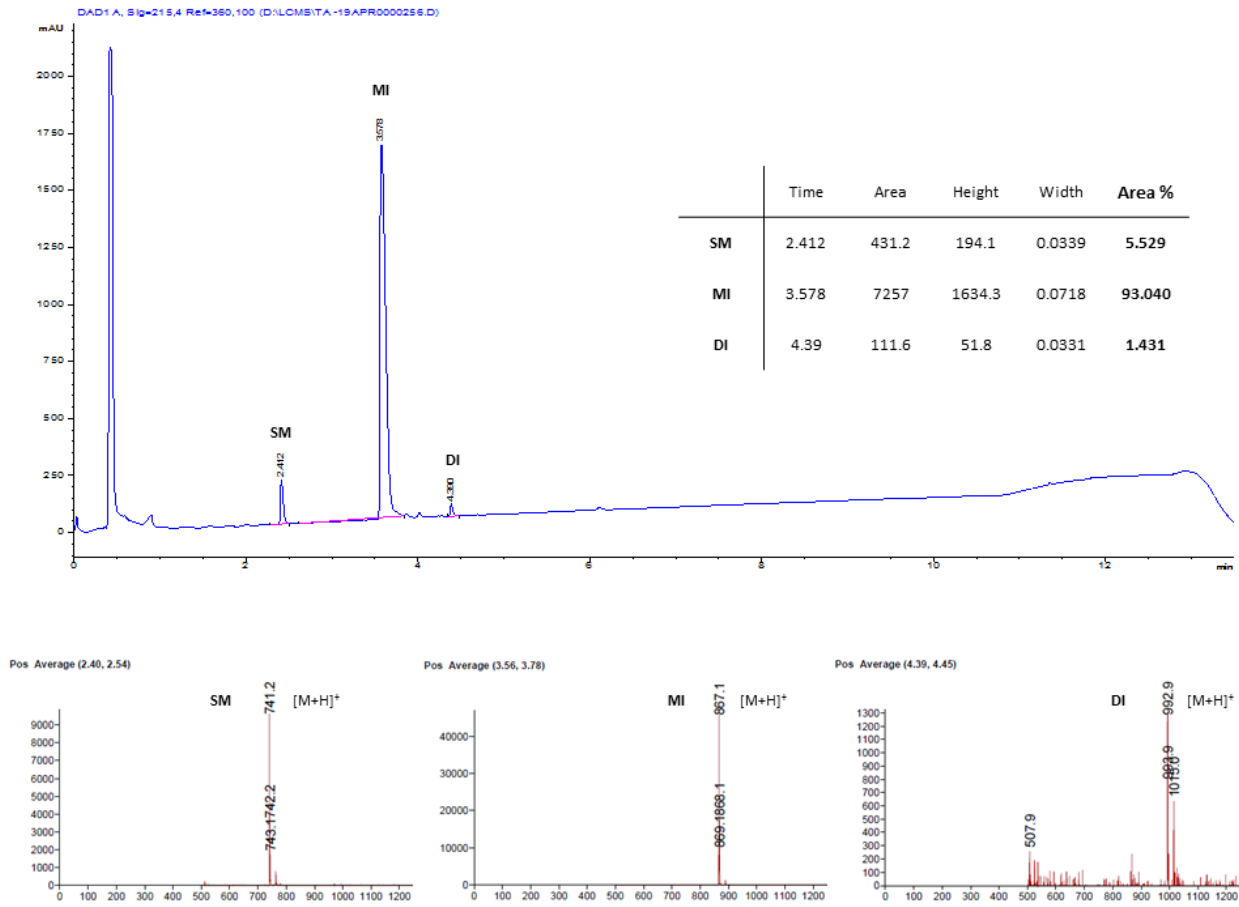

# [Tyr<sup>8</sup>]-Substance P

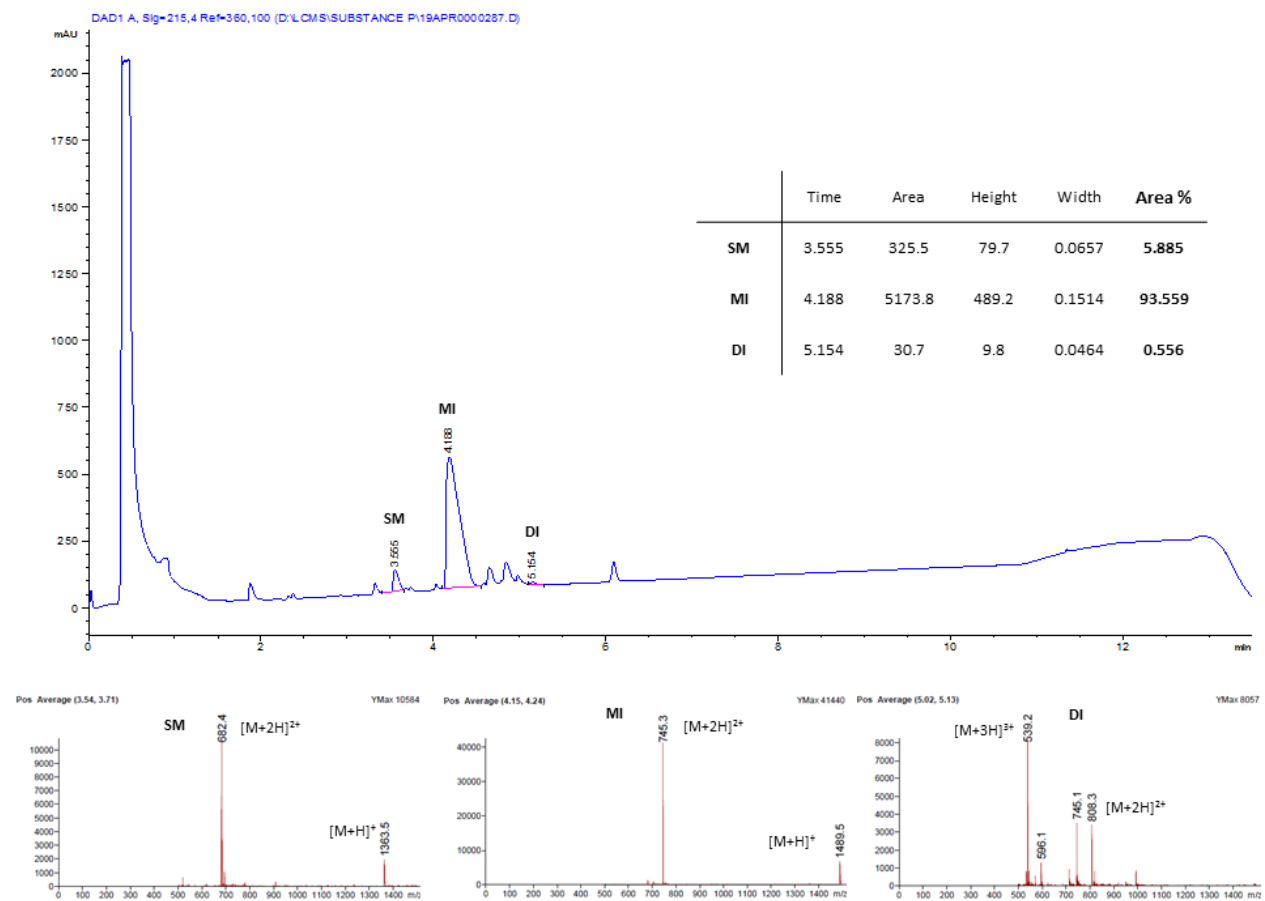

# Human GLP-1 (7-37)

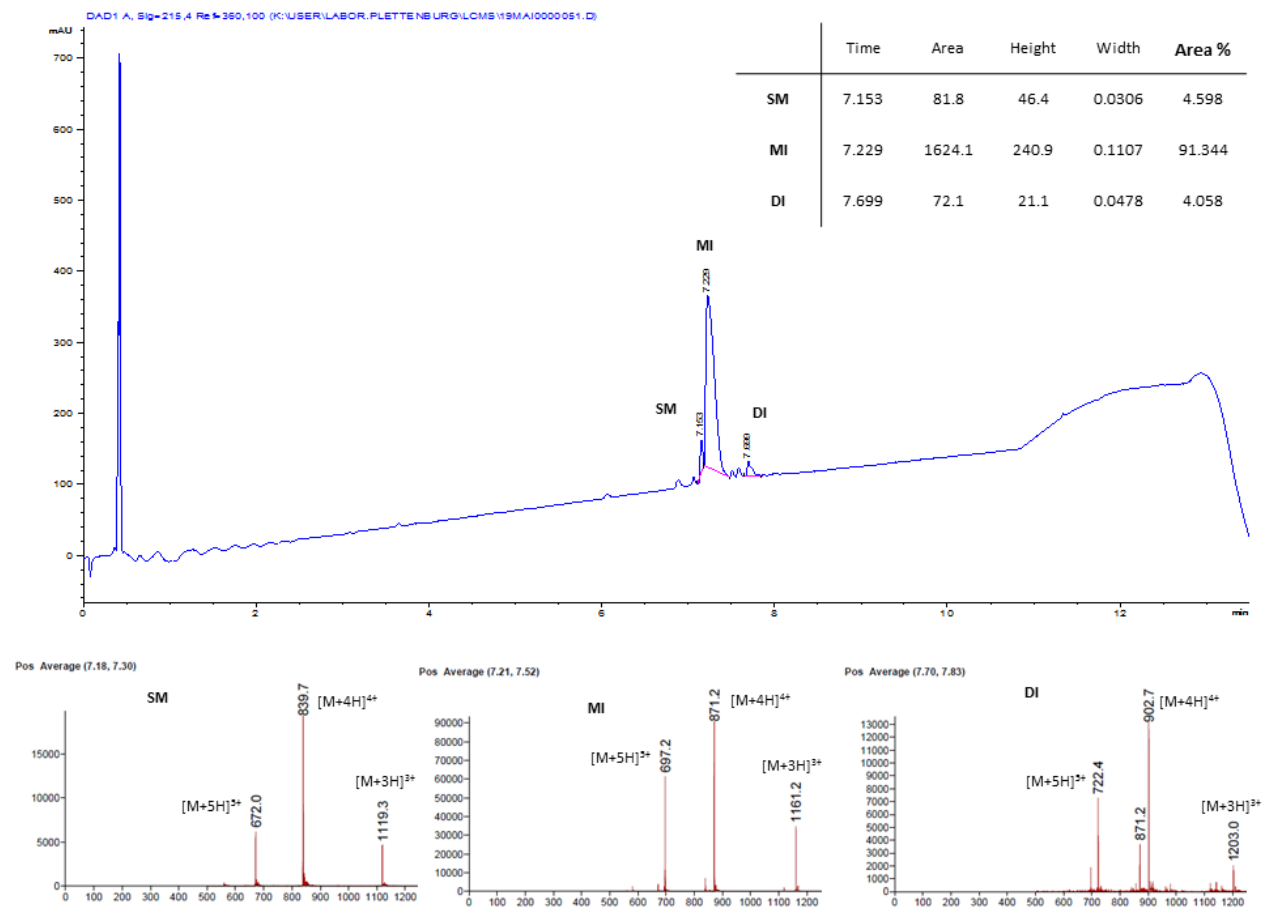

Cyclo(RGDyK) (1.02 mg, 1.18  $\mu$ mol) was dissolved in 500  $\mu$ L of DCM and 125  $\mu$ L of TFA. Then were added dropwise 33  $\mu$ L of a 50 mM iodination stock solution (1.65  $\mu$ mol, 1.4 eq.) (stock solution freshly prepared: 29.1 mg of Selectfluor were dissolved in 1.6 mL of ACN before the addition of 12.5 mg of NaI). The reaction mixture was allowed to stir at room temperature for 15 minutes. Two other additions of iodination solution (2 x 5  $\mu$ L, 2 x 0.25 eq.) were needed to reach the following final ratio: SM: 5.5% - MI: 88.3% - DI: 6.2%. The reaction mixture was then evaporated under reduced pressure (TFA was co-evaporated three times with DCM) and redissolved in water/acetonitrile (1/1) before being submitted to HPLC (purification performed on Agilent Zorbax Rx C18, gradient: see general methods). The collected fraction was lyophilized to afford the desired product Cyclo(RGD[mono-iodo]yK) (m= 0.88 mg, 0.90  $\mu$ mol, 77 % yield).

**<sup>13</sup>C NMR** (175 MHz, d<sub>6</sub>-DMSO, 308 K) δ: 22.4, 25.1, 26.4, 28.5, 30.6, 35.0, 35.9, 38.6, 40.3, 43.2, 48.8, 51.8, 54.3, 54.5, 84.1, 114.6, 129.1, 130.2, 138.9, 155.0, 156.6, 169.4, 169.9, 170.5, 171.1, 171.5, 171.8.

**UPLC-MS** rt: 3.257 min (Gradient 2).

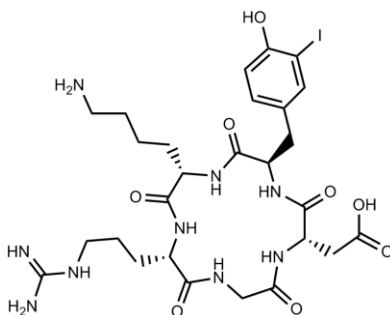



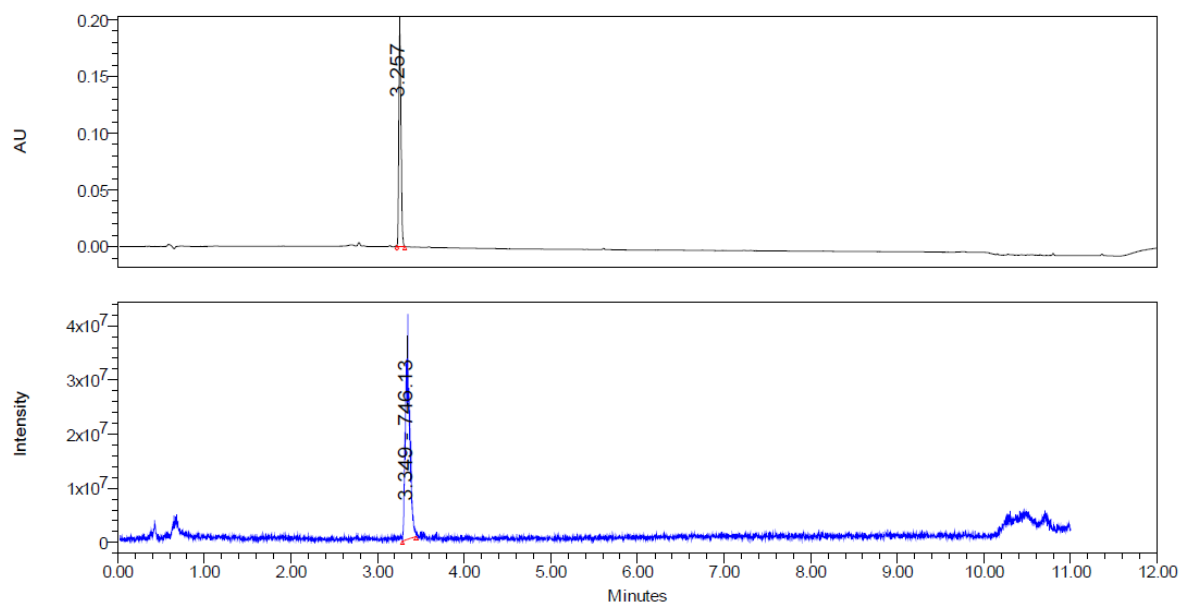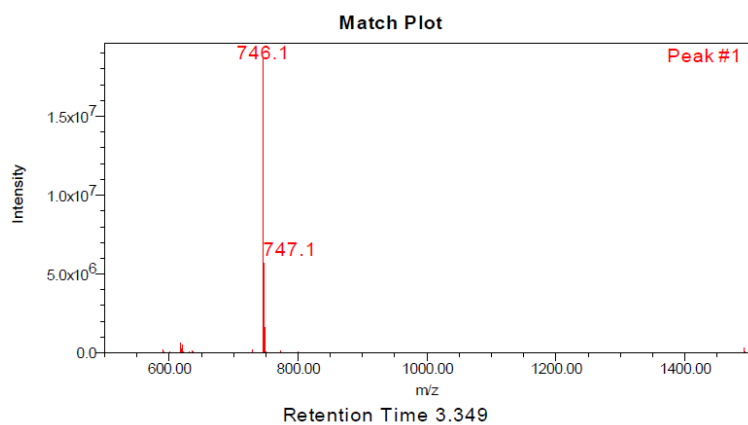

### Mono-iodination of Leucin-Enkephalinamide (8)

Leucin-Enkephalinamide (36.0 mg, 64.9  $\mu\text{mol}$ ) was dissolved in 26 mL of DCM and 6.5 mL of TFA. Then were added dropwise 1.8 mL of a 50 mM iodination stock solution (91  $\mu\text{mol}$ , 1.4 eq.) (stock solution freshly prepared: 50.0 mg of Selectfluor were dissolved in 2.8 mL of ACN before the addition of 21.0 mg of NaI). The reaction mixture was allowed to stir at room temperature for 15 minutes. Two other additions of iodination solution (2 x 320  $\mu\text{L}$ , 2 x 0.25 eq.) were needed to reach the following final ratio: SM: 1.0% - MI: 88.2% - DI: 10.8%. The reaction mixture was then evaporated under reduced pressure (TFA was co-evaporated three times with DCM) and redissolved in water/acetonitrile (1/1) before being submitted to HPLC (purification performed on Xbridge Prep C18, gradient: see general methods). The collected fraction was lyophilized to afford the desired product [mono-Iodo]-Leucin-Enkephalinamide (27.3 mg, 40.1  $\mu\text{mol}$ , 62 % yield).

$^1\text{H}$  NMR (500 MHz,  $d_6$ -DMSO, 300 K)  $\delta$ : 0.84 (d, 3H), 0.88 (d, 3H), 1.47 (m, 2H), 1.57 (m, 1H), 2.53 (s, 1H), 2.80 (dd, 1H), 2.87 (dd, 1H), 3.02 (dd, 1H), 3.45 (q, 1H), 3.61 (dd, 1H), 3.70 (m, 3H), 4.18 (m, 1H), 4.49 (m, 1H), 6.77 (d, 1H,  $J$  = 8.2 Hz), 6.97 (s, 1H), 7.03 (dd, 1H,  $J$  = 8.2, 2.0 Hz), 7.17 (m, 1H), 7.25 (d, 4H,  $J$  = 4.4 Hz), 7.53 (d, 1H,  $J$  = 2.0 Hz), 7.96 (d, 1H,  $J$  = 8.2 Hz), 8.07 (d, 1H,  $J$  = 8.2 Hz), 8.11 (t, 1H,  $J$  = 5.6 Hz), 8.18 (s, 1H), 8.30 (s, 1H), 10.10 (br, 1H).

$^{13}\text{C}$  NMR (125 MHz,  $d_6$ -DMSO, 300 K)  $\delta$ : 21.56, 23.02, 24.19, 37.28, 38.53, 40.80, 41.90, 42.02, 50.99, 54.09, 55.77, 84.36, 114.64, 126.26, 128.04, 129.17, 130.40, 130.62, 137.78, 139.22, 155.08, 163.38, 168.75, 169.10, 170.69, 173.76, 173.88.

HRMS (ESI-TOF) Calcd for  $\text{C}_{28}\text{H}_{38}\text{IN}_6\text{O}_6$ : 681.1892; Found: 681.1891.

UPLC-MS rt: 3.878 min (Gradient 1).

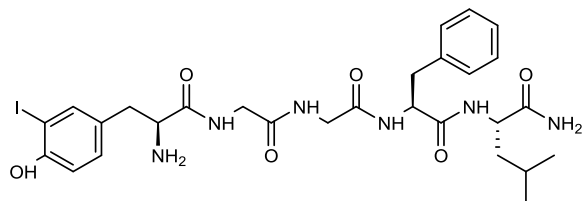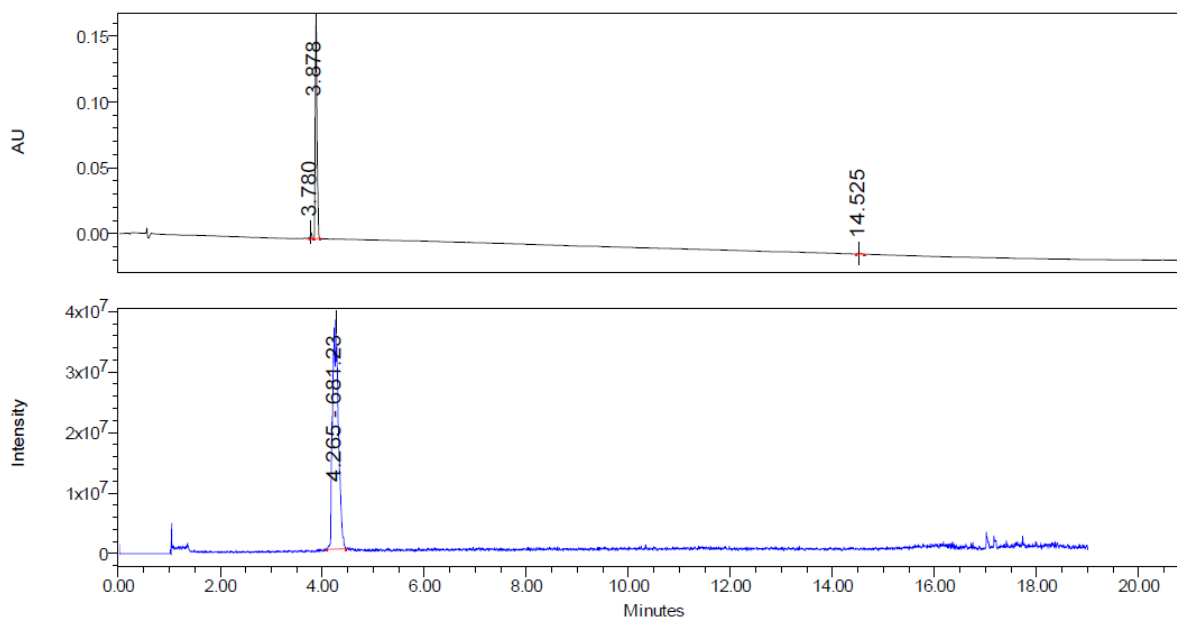

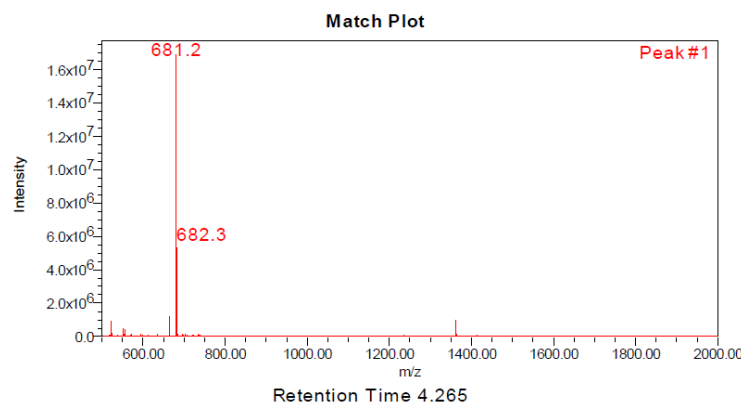

### Mono-iodination of [Tyr<sup>0</sup>]-Bradykinin

[Tyr<sup>0</sup>]-Bradykinin (1.58 mg, 1.29  $\mu$ mol) was dissolved in 740  $\mu$ L of DCM and 180  $\mu$ L of TFA. Then were added dropwise 36  $\mu$ L of a 50 mM iodination stock solution (1.80  $\mu$ mol, 1.4 eq.) (stock solution freshly prepared: 29.1 mg of Selectfluor were dissolved in 1.6 mL of ACN before the addition of 12.5 mg of NaI). The reaction mixture was allowed to stir at room temperature for 15 minutes. Two other additions of iodination solution (2 x 6.5  $\mu$ L, 2 x 0.25 eq.) were needed to reach the following final ratio: SM: 1.9% - MI: 92.7% - DI: 5.4%. The reaction mixture was then evaporated under reduced pressure (TFA was co-evaporated three times with DCM) and redissolved in water/acetonitrile (1/1) before being submitted to HPLC (purification performed on Agilent Zorbax Rx C18, gradient: see general methods). The collected fraction was lyophilized to afford the desired product [mono-Iodo-Tyr<sup>0</sup>]-Bradykinin (1.46 mg, 0.93  $\mu$ mol, 72 % yield).

<sup>1</sup>H NMR (500 MHz, d<sub>6</sub>-DMSO, 300 K)  $\delta$ : 1.43 (m, 1H), 1.51 (m, 5H), 1.61 (m, 2H), 1.70 (m, 2H), 1.79-2.05 (br, 9H), 2.18 (m, 1H), 2.72 (m, 2H), 2.79 (dd, 1H), 2.89 (dd, 1H), 2.96 (dd, 1H), 3.11 (m, 5H), 3.51 (m, 2H), 3.62 (m, 8H), 3.99 (m, 1H), 4.20 (m, 1H), 4.26 (dd, 1H), 4.30 (dd, 1H), 4.49 (m, 1H), 4.50-4.62 (m, 4H), 5.36 (s, 1H), 6.78 (d, 1H, J = 8.2 Hz), 7.00 (dd, 1H, J = 8.2, 2.0 Hz), 7.15-7.30 (m, 10H), 7.51 (d, 1H, J = 2.0 Hz), 7.56 (t, 1H), 7.61 (t, 1H), 7.70 (d, 1H), 7.94 (m, 2H), 8.08 (br, 2H), 8.13 (d, 1H), 8.31 (d, 1H), 8.66 (d, 1H), 10.31 (s, 1H), 12.72 (s, 1H).

<sup>13</sup>C NMR (125 MHz, d<sub>6</sub>-DMSO, 300 K)  $\delta$ : 23.72, 24.43, 24.52, 25.09, 27.90, 28.12, 28.58, 28.81, 29.08, 35.47, 37.26, 37.72, 40.27, 40.47, 41.67, 46.82, 46.90, 50.01, 51.49, 52.60, 53.12, 53.38, 53.45, 57.63, 59.44, 59.60, 61.73, 84.78, 114.66, 126.26, 126.29, 126.90, 127.97, 128.02, 129.10, 129.13, 130.71, 137.57, 137.68, 139.39, 155.85, 156.66, 156.74, 167.52, 168.48, 168.50, 169.63, 170.04, 170.85, 170.95, 170.96, 171.77, 173.08.

HRMS (ESI-TOF) Calcd for C<sub>59</sub>H<sub>81</sub>IN<sub>16</sub>O<sub>13</sub>: 1348.5214; Found: 1348.5255.

UPLC-MS rt: 2.664 min (Gradient 1).

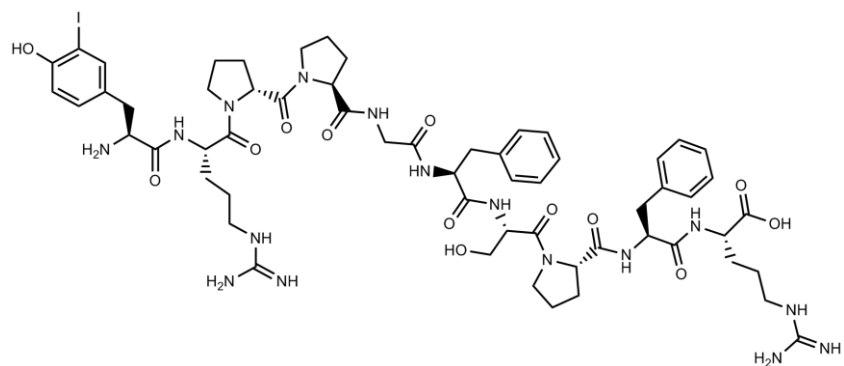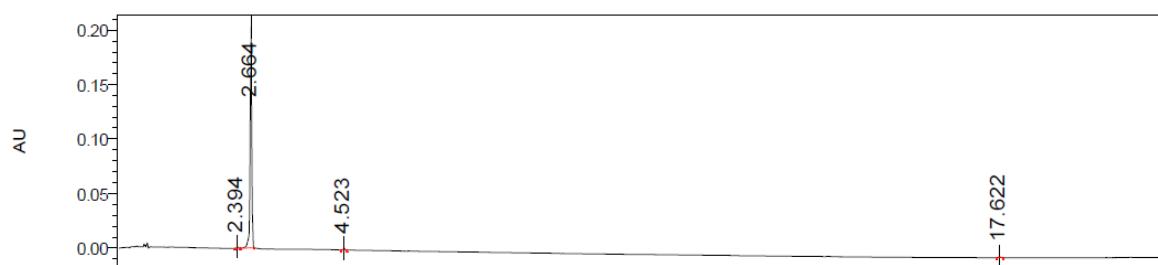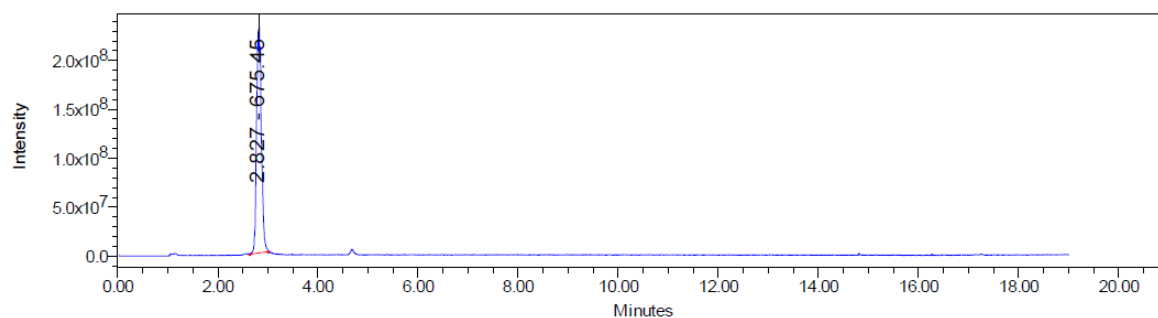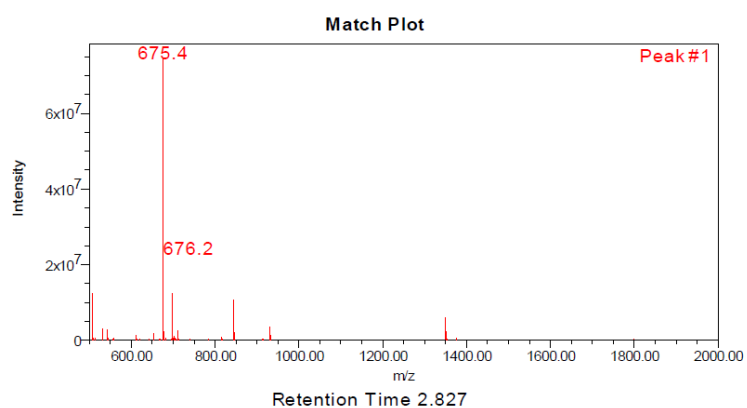

Angiotensin III (20.0 mg, 15.7  $\mu$ mol) was dissolved in 8.5 mL of DCM and 2.0 mL of TFA. Then were added dropwise 440  $\mu$ L of a 50 mM iodination stock solution (22.0  $\mu$ mol, 1.4 eq.) (stock solution freshly prepared: 14.8 mg of Selectfluor were dissolved in 830  $\mu$ L of ACN before the addition of 6.9 mg of NaI). The reaction mixture was allowed to stir at room temperature for 15 minutes. Three other additions of iodination solution (3 x 80  $\mu$ L, 3 x 0.25 eq.) were needed to reach the following final ratio: SM: 6.2% - MI: 91.3% - DI: 2.5%. The reaction mixture was then evaporated under reduced pressure (TFA was co-evaporated three times with DCM) and redissolved in water/acetonitrile (1/1) before being submitted to HPLC (purification performed on Xbridge Prep C18, gradient: see general methods). The collected fraction was lyophilized to afford the desired product [mono-Iodo]-Angiotensin III (14.9 mg, 11.6  $\mu$ mol, 74 % yield).

**<sup>13</sup>C NMR** (125 MHz, d<sub>6</sub>-DMSO, 300 K) δ: 10.85, 15.19, 17.57, 19.19, 24.10, 24.25, 24.28, 26.30, 28.62, 29.13, 31.11, 35.77, 36.62, 37.01, 40.12, 46.99, 47.7, 51.72, 53.83, 53.93, 56.65, 57.12, 59.87, 84.27, 114.41, 117.1, 126.2, 128.00, 129.17, 130.29, 130.36, 133.8, 137.88, 138.97, 155.02, 156.71, 168.22, 170.48, 170.85, 170.97, 171.43, 172.55.

**UPLC-MS** rt: 4.481 min (Gradient 2).

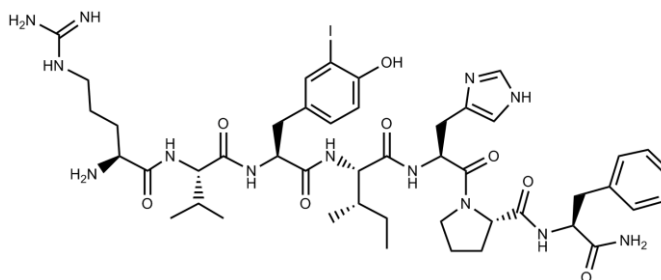

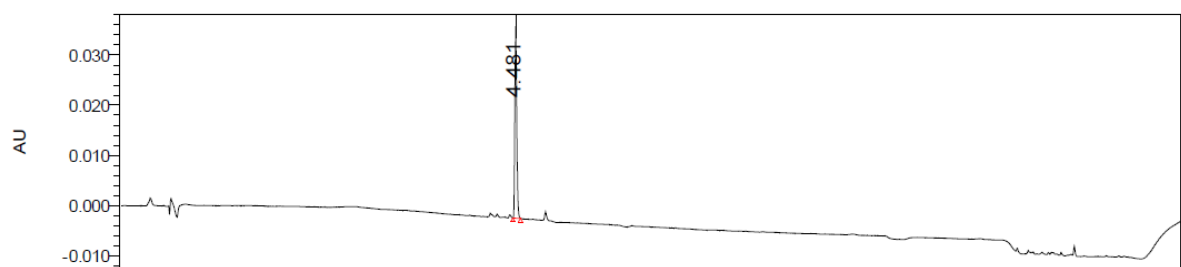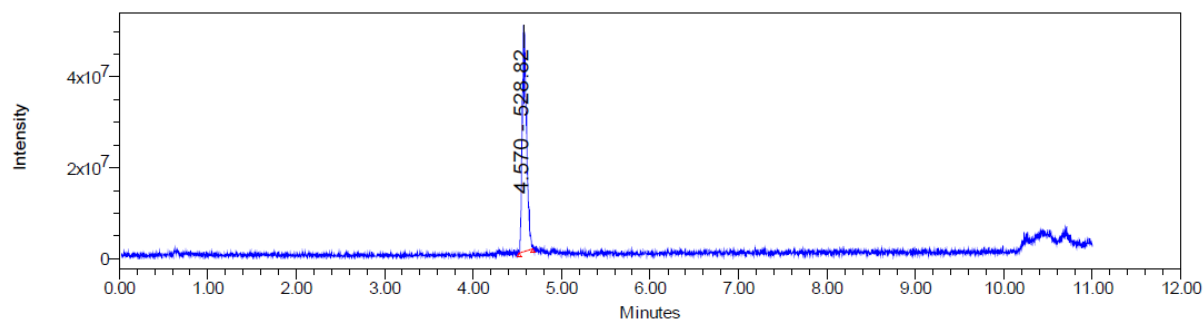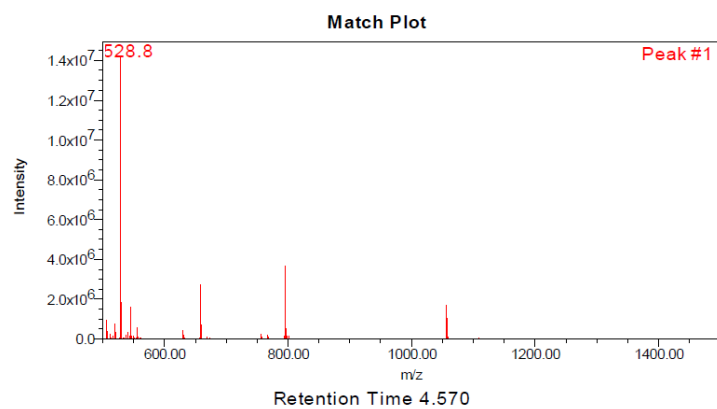

### Mono-iodination of ACP-fragment 65-74 (11)

ACP fragment 65-74 (18.0 mg, 15.3  $\mu$ mol) was dissolved in 6.0 mL of DCM and 1.5 mL of TFA. Then were added dropwise 428  $\mu$ L of a 50 mM iodination stock solution (21.4  $\mu$ mol, 1.4 eq.) (stock solution freshly prepared: 15.3 mg of Selectfluor were dissolved in 860  $\mu$ L of ACN before the addition of 7.0 mg of NaI). The reaction mixture was allowed to stir at room temperature for 15 minutes. Two other additions of iodination solution (2 x 45  $\mu$ L, 2 x 0.1 eq.) were needed to reach the following final ratio: SM: 2.3% - MI: 93.7% - DI: 4.0%. The reaction mixture was then evaporated under reduced pressure (TFA was co-evaporated three times with DCM) and redissolved in water/acetonitrile (1/1) before being submitted to HPLC (purification performed on Xbridge Prep C18, gradient: see general methods). The collected fractions were lyophilized to afford the desired product [mono-Iodo]-ACP fragment 65-74 (11.5 mg, 9.7  $\mu$ mol, 63 % yield).

<sup>1</sup>H NMR (500 MHz, d<sub>6</sub>-DMSO, 295 K)  $\delta$ : 0.73 (d, 3H), 0.76 (t, 3H), 0.80 (m, 6H), 0.91 (d, 3H), 0.92 (d, 3H), 1.00 (m, 1H), 1.06 (m, 1H), 1.17 (d, 3H), 1.18 (d, 3H), 1.35 (m, 1H), 1.43 (m, 1H), 1.66 (m, 2H), 1.76 (m, 1H), 1.87 (m, 1H), 2.03 (m, 1H), 2.13 (m, 2H), 2.43 (m, 1H), 2.51 (m, 1H), 2.62 (m, 3H), 2.84 (dd, 1H), 3.58 (m, 3H), 4.09 (t, 1H), 4.12 (t, 1H), 4.28 (m, 1H), 4.32 (m, 2H), 4.44 (m, 2H), 4.51 (m, 1H), 6.74 (d, J = 8.2 Hz, 1H), 6.84 (s, 1H), 6.99 (br, 1H), 7.02 (dd, J = 8.2, 1.8 Hz, 1H), 7.14 (s, 1H), 7.19 (s, 1H), 7.28 (s, 1H), 7.46 (s, 1H), 7.52 (d, J = 1.8 Hz, 1H), 7.67 (d, 1H), 7.77 (d, 1H), 8.04 (m, 5H), 8.10 (d, 1H), 8.17 (m, 2H), 8.28 (d, 1H), 8.52 (d, 1H), 10.07 (s, 1H), 12.35 (s, 1H).

<sup>13</sup>C NMR (125 MHz, d<sub>6</sub>-DMSO, 295 K)  $\delta$ : 11.08, 11.11, 15.15, 15.27, 17.07, 17.79, 18.22, 18.33, 24.01, 24.45, 28.02, 29.89, 31.29, 35.96, 36.27, 36.43, 36.57, 36.99, 42.41, 47.97, 48.02, 49.54, 49.92, 52.07, 53.94, 56.6, 57.18, 57.25, 84.22, 114.49, 130.19, 130.34, 139.1, 155.01, 167.63, 170.29, 170.47, 170.6, 170.83, 171.01, 171.07, 171.11, 171.65, 171.82, 171.86, 171.91, 173.73.

HRMS (ESI-TOF) Calcd for C<sub>47</sub>H<sub>74</sub>IN<sub>13</sub>O<sub>15</sub>: 1187.4472; Found: 1187.4526.

UPLC-MS rt: 3.774 min (Gradient 1).

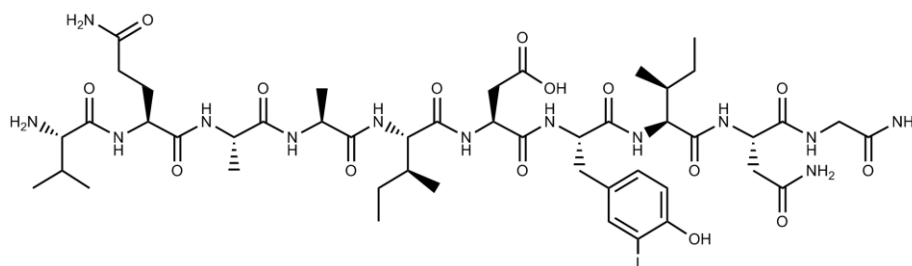

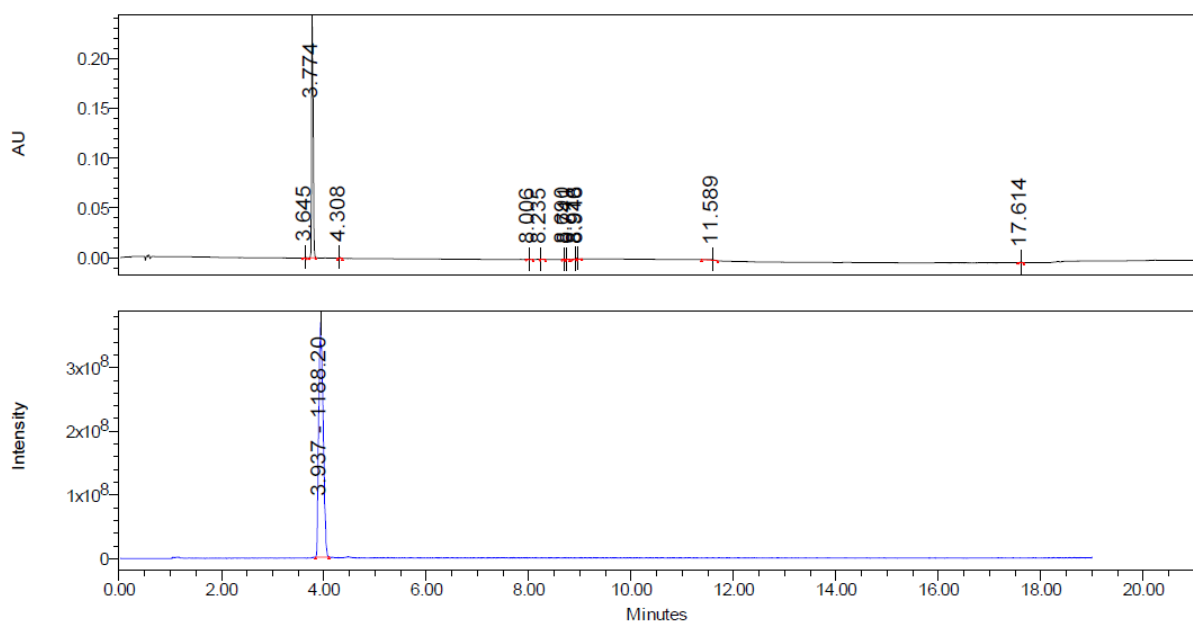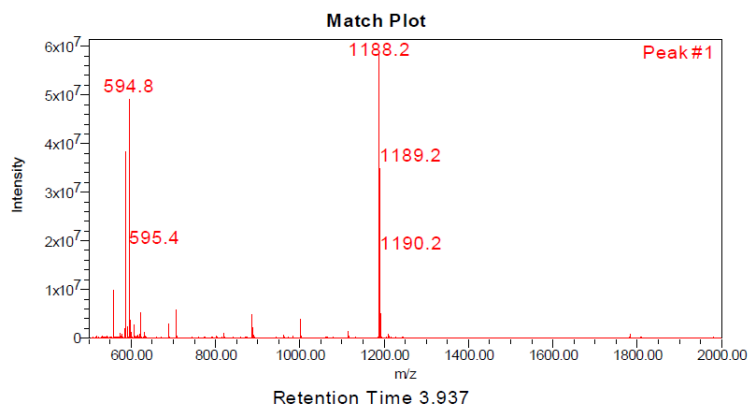



[Tyr<sup>8</sup>]-Substance P (3.0 mg, 2.2 μmol) was dissolved in 1.4 mL of DCM and 300 μL of TFA. Then were added dropwise 60 μL of a 50 mM iodination stock solution (3.0 μmol, 1.4 eq.) (stock solution freshly prepared: 15.0 mg of Selectfluor were dissolved in 840 μL of ACN before the addition of 7.2 mg of NaI). The reaction mixture was allowed to stir at room temperature for 15 minutes. Three other additions of iodination solution (3 x 15 μL, 3 x 0.35 eq.) were needed to reach the following final ratio: SM: 5.9% - MI: 93.6% - DI: 0.5%. The reaction mixture was then quenched with 400 μL of reducing cocktail (freshly prepared: KI (10 mg) and ascorbic acid (10 mg) were sonicated in 500 μL of TFA for 10 minutes) and evaporated under reduced pressure (TFA was co-evaporated three times with DCM). The crude was dissolved in water/acetonitrile (1/1) before being submitted to HPLC (purification performed on Agilent Zorbax Rx C18, gradient: see general methods). The collected fractions were lyophilized to afford the desired product [mono-Iodo-Tyr<sup>8</sup>]-Substance P (2.9 mg, 1.6 μmol, 72 % yield).

**<sup>13</sup>C NMR** (175 MHz, d<sub>6</sub>-DMSO, 295 K) δ: 14.65, 21.59, 21.84, 23.13, 23.62, 24.12, 24.67, 24.68, 26.56, 27.11, 27.39, 27.90, 29.03, 29.22, 29.70, 30.12, 31.48, 31.57, 31.59, 36.18, 37.50, 38.58, 40.22, 40.70, 41.99, 49.88, 47.04, 50.43, 50.48, 51.21, 51.76, 52.30, 52.80, 54.13, 54.29, 59.24, 59.83, 84.28, 114.63, 126.20, 128.04, 129.11, 130.22, 130.33, 137.59, 139.21, 155.10, 156.79, 166.84, 168.64, 170.38, 170.87, 170.92, 170.98, 171.30, 171.93, 172.04, 173.08, 174.19, 174.24.

**UPLC-MS** rt: 2.555 min (Gradient 1).

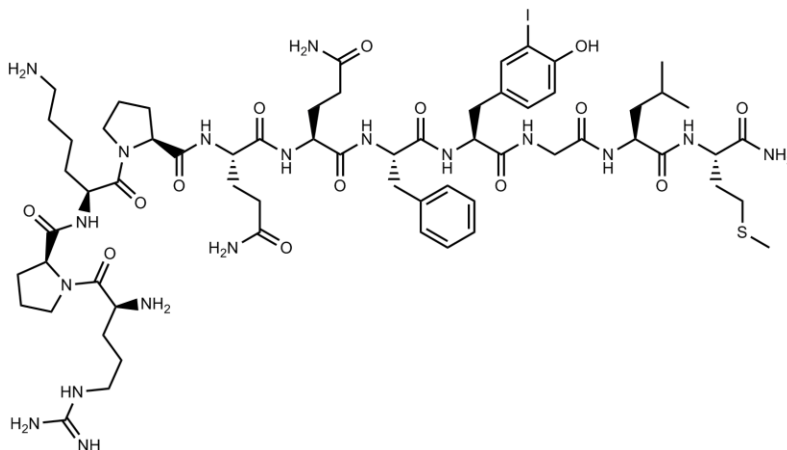

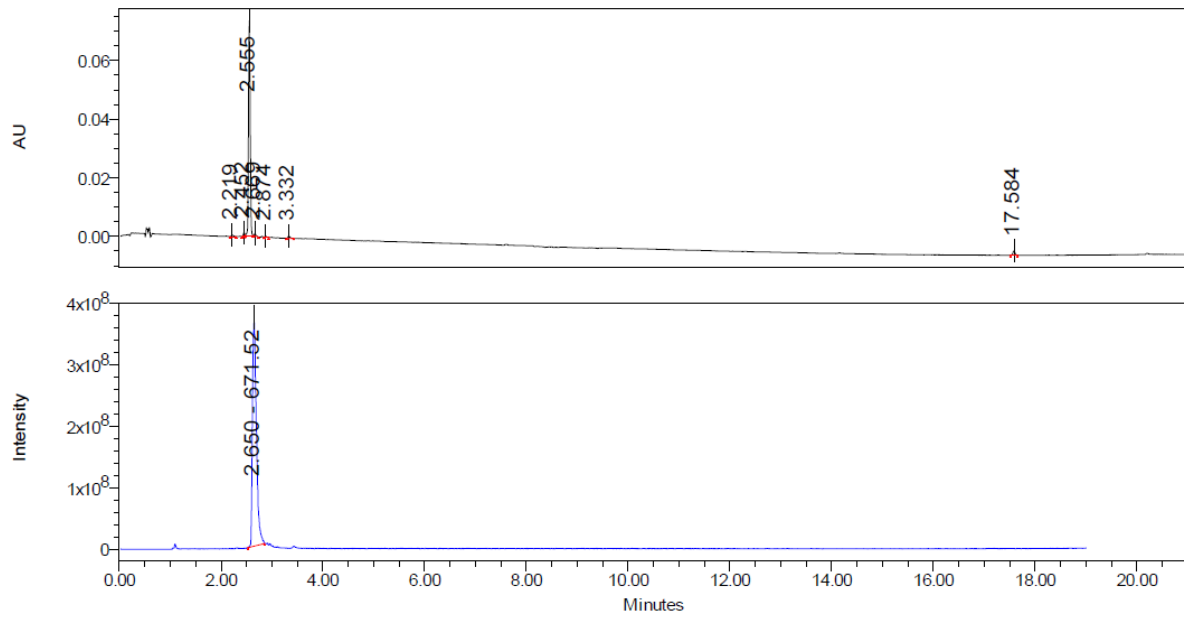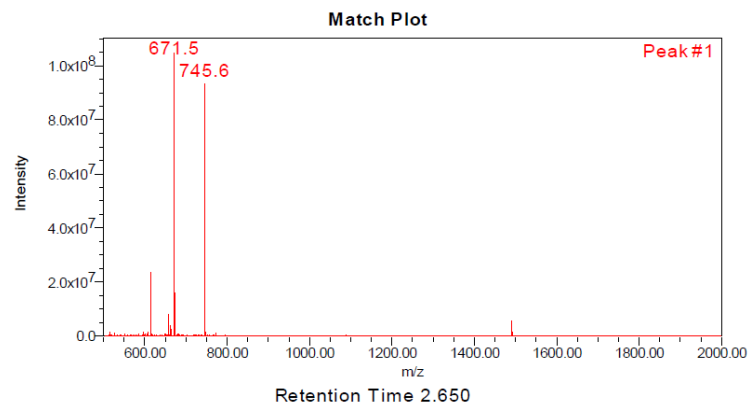

### Mono-iodination of GLP-1(7-37)

GLP-1(7-37) (40.0 mg, 11.9  $\mu\text{mol}$ ) was dissolved in 5.6 mL of DCM and 1.4 mL of TFA. Then were added dropwise 330  $\mu\text{L}$  of a 50 mM iodination stock solution (3.0  $\mu\text{mol}$ , 1.4 eq.) (stock solution freshly prepared: 15.0 mg of Selectfluor were dissolved in 840  $\mu\text{L}$  of ACN before the addition of 7.2 mg of NaI). The reaction mixture was allowed to stir at room temperature for 15 minutes. Two other additions of iodination solution (2 x 55  $\mu\text{L}$ , 3 x 0.25 eq.) were needed to reach the following final ratio: SM: 4.6% - MI: 91.3% - DI: 4.1%. The reaction mixture was then evaporated under reduced pressure (TFA was co-evaporated three times with DCM). The crude was dissolved in water/acetonitrile (1/1) before being submitted to HPLC (purification performed on Waters Acquity CSH C18, gradient: see general methods). The collected fractions were lyophilized to afford the desired product [mono-Iodo]-GLP-1(7-37) (21.5 mg, 6.2  $\mu\text{mol}$ , 52 % yield).

**HRMS** (ESI-TOF) Calcd for  $\text{C}_{151}\text{H}_{227}\text{IN}_{40}\text{O}_{47}$   $[\text{M}+3\text{H}]^{3+}$  1741.2900; Found: 1741.2999.

**UPLC-MS** rt: 6.217 min (Gradient 1).

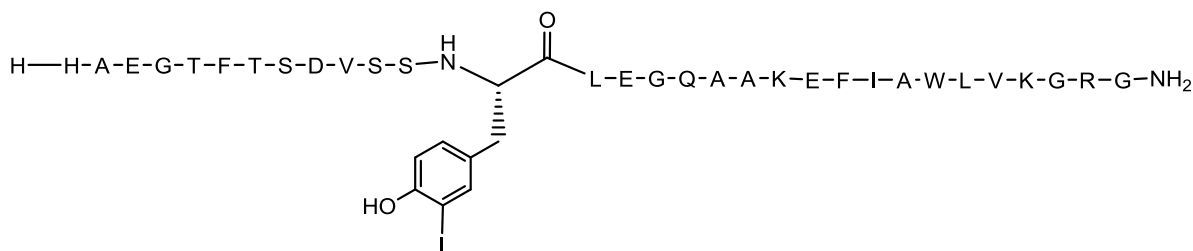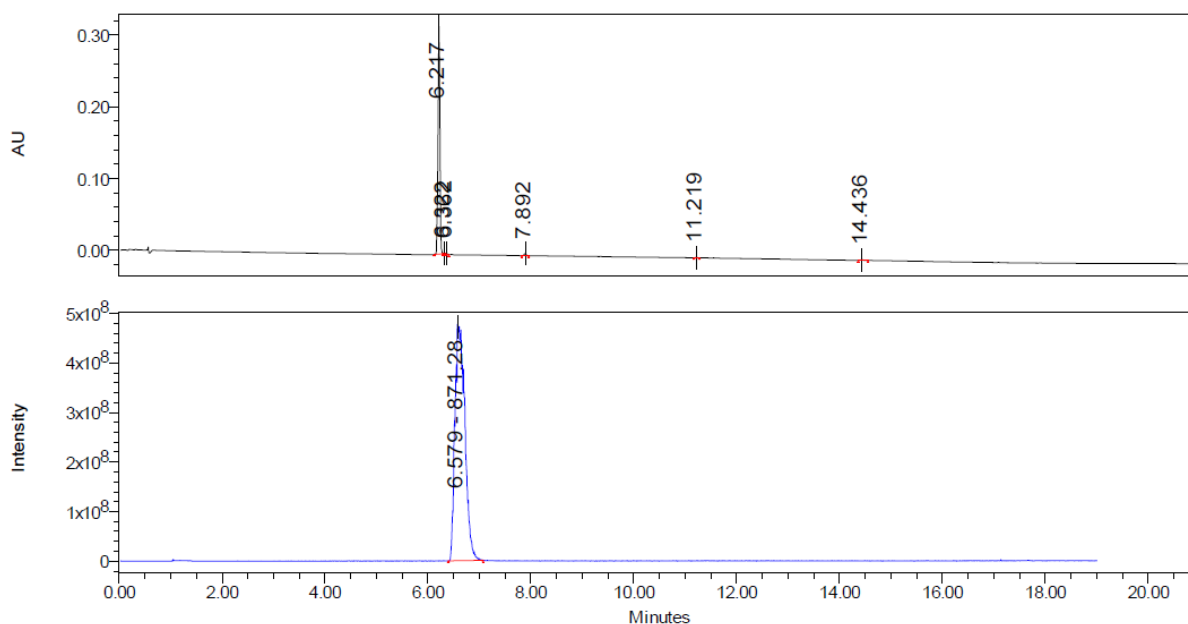

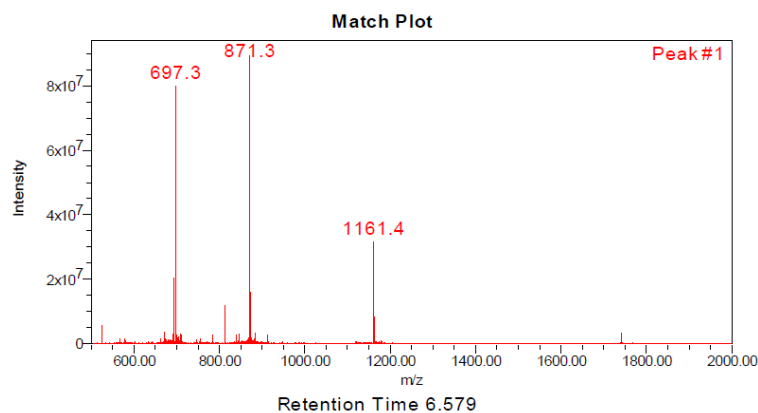

---

### Synthesis of Amino-PEG<sub>2</sub>-Dansyl

Dansyl chloride (100 mg, 370  $\mu\text{mol}$ ) was dissolved in 1.0 mL of DCM before the addition dropwise of tert-butyl(2-(2-(2-aminoethoxy)ethoxy)ethyl)carbamate (105  $\mu\text{L}$ , 445  $\mu\text{mol}$ ) previously dissolved in 1 mL of DCM. The mixture was allowed to stir at room temperature for 2 hours. Reaction was monitored by LC-MS. The mixture was then diluted with 4 mL of brine, washed with water three times before being dried over magnesium sulfate and filtered. Subsequently 450  $\mu\text{L}$  of TFA were added to the mixture (~10% v/v DCM) to induce Boc deprotection. After 15 min, LC-MS showed completion of reaction. The mixture was evaporated under reduced pressure and redissolved in acetonitrile and water before lyophilization to afford the desired product as pale yellow oil (201 mg, 346  $\mu\text{mol}$ , 93 % yield).

**<sup>1</sup>H NMR** (400 MHz,  $d_6$ -DMSO, 295 K)  $\delta$ : 1.28 (s, 1H), 2.07 (s, 1H), 2.84 (s, 6H), 2.96 (m, 5H), 3.56 (m, 4 H), 4.60 (s, 1H), 5.37 (br s, 3H), 5.75 (br s, 1H), 7.27 (d,  $J$ =7.46 Hz, 1H), 7.61 (m, 2H), 7.72 (br s, 3H), 7.99 (t,  $J$ =5.81, 5.81 Hz, 1H), 8.11 (dd,  $J$ =7.34, 0.98 Hz, 1H), 8.30 (d,  $J$ =8.68 Hz, 1H), 8.47 (d,  $J$ =8.44 Hz, 1H).

**<sup>13</sup>C NMR** (150 MHz,  $d_6$ -DMSO, 300 K)  $\delta$ : 38.54, 42.16, 45.06 (2C), 66.58, 69.01, 69.30, 69.43, 115.13, 119.23, 123.56, 127.75, 128.00, 128.99, 129.03, 129.27, 136.21, 151.17.

**HRMS** (ESI-TOF) Calcd for  $\text{C}_{18}\text{H}_{27}\text{N}_3\text{O}_4\text{S}$ : 382.1795; Found: 382.1795.

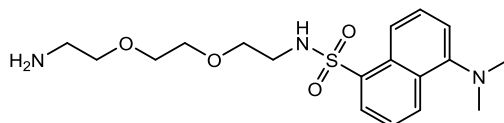

### Synthesis of Boronic pinacol ester-PEG<sub>2</sub>-Dansyl (9)

4-Carboxylphenylboronic acid pinacol ester (31 mg, 125  $\mu$ mol), DIEA (45  $\mu$ L, 258  $\mu$ mol) and propylphosphonic anhydride T3P (75  $\mu$ L, 125  $\mu$ mol - 50% wt. solution in ethyl acetate) were dissolved in 1 mL of DCM and stirred at room temperature for 5 minutes before the dropwise addition of amino-PEG<sub>2</sub>-Dansyl (60 mg, 104  $\mu$ mol) and DIEA (45  $\mu$ L, 258  $\mu$ mol) previously dissolved in 750  $\mu$ L of DCM. The reaction mixture was allowed to stir at room temperature. After 30 min, LC-MS showed completion of reaction. The crude was evaporated under reduced pressure and purified via silica gel chromatography (0->100% EtOAc/Hept – product eluted around ~80% EtOAc/Hept) to afford the desired product as a yellow oil (39 mg, 64  $\mu$ mol, 62 % yield).

<sup>1</sup>H NMR (400 MHz, d<sub>6</sub>-DMSO, 295 K)  $\delta$ : 1.17 (m, 1 H), 1.31 (s, 12 H), 1.91 (s, 1 H), 1.99 (s, 1 H), 2.50 (u), 2.82 (s, 6 H), 2.94 (q, J=5.83, 5.83, 5.83 Hz, 2 H), 3.28 (m, 4 H), 3.45 (u), 4.03 (q, J=7.17, 7.17, 7.17 Hz, 1 H), 7.24 (d, J=7.46 Hz, 1 H), 7.59 (m, 2 H), 7.74 (m(para), 2 H), 7.83 (m(para), 2 H), 8.11 (dd, J=7.34, 0.98 Hz, 1 H), 7.98 (t, J=5.81, 5.81 Hz, 1 H), 8.28 (d, J=8.68 Hz, 1 H), 8.44 (d, J=8.56 Hz, 1 H), 8.52 (t, J=5.50, 5.50 Hz, 1 H).

<sup>13</sup>C NMR (150 MHz, d<sub>6</sub>-DMSO, 300 K)  $\delta$ : 24.65(4C), 39.51, 42.20, 45.03(2C), 68.72, 68.93, 69.29, 69.38, 83.89(2C), 115.05, 119.21, 123.50, 126.47(2C), 127.71, 127.97, 129.01, 129.03, 129.24, 134.21(2C), 136.32, 136.80, 151.27, 165.99.

The carbon directly bonded to boron could not be detected due to quadrupolar relaxation.

HRMS (ESI-TOF) Calcd for C<sub>31</sub>H<sub>43</sub>BN<sub>3</sub>O<sub>7</sub>S [M+Na]<sup>+</sup> 634.2734; Found: 634.2737.

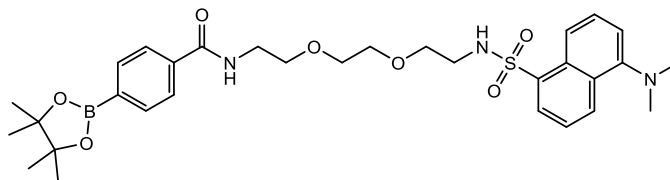

### Synthesis of Boronic pinacol ester-PEG<sub>3</sub>-azide (12)

4-carboxylphenylboronic acid pinacol ester (200 mg, 806  $\mu$ mol), DIEA (422  $\mu$ L, 2.42 mmol) and propylphosphonic anhydride T3P (720  $\mu$ L, 1.21 mmol – 50% wt. solution in ethyl acetate) were dissolved in 500  $\mu$ L of DCM and was allowed to premix at room temperature for 5 minutes before the dropwise addition of amino-PEG<sub>3</sub>-azide (211 mg, 968  $\mu$ mol) previously dissolved in 500  $\mu$ L of DCM.

The reaction was stirred at room temperature for 10 minutes. Reaction was monitored by LC-MS. The crude was dissolved in 5 mL of DCM and 5 mL of 0.5M HCl aqueous solution, washed twice with water (2x5mL) before being dried with magnesium sulfate, filtered and evaporated under reduced pressure to afford the desired product as a white powder (308 mg, 687  $\mu$ mol, 85 % yield).

<sup>1</sup>H NMR (400 MHz, d<sub>6</sub>-DMSO, 295 K)  $\delta$ : 0.94 (m, 1 H), 1.31 (s, 12 H), 1.48 (m, 1 H), 2.50 (u), 3.23 (br s, 1 H), 3.44 (br s, 1 H), 3.53 (d, J=4.65 Hz, 9 H), 3.57 (m, 4 H), 7.79 (m(para), 4 H), 8.55 (t, J=5.50, 5.50 Hz, 1 H).

**<sup>13</sup>C NMR** (150 MHz, d<sub>6</sub>-DMSO, 300 K) δ: 24.65(4C), 39.51, 49.95, 68.78, 69.18, 69.57, 69.64, 69.73, 69.76, 83.89(2C), 126.49(2C), 134.21(2C), 136.84, 166.00.

The carbon directly bonded to boron could not be detected due to quadrupolar relaxation.

**HRMS** (ESI-TOF) Calcd for C<sub>21</sub>H<sub>34</sub>BN<sub>4</sub>O<sub>6</sub> [M+Na]<sup>+</sup> 471.2389; Found: 471.2388.

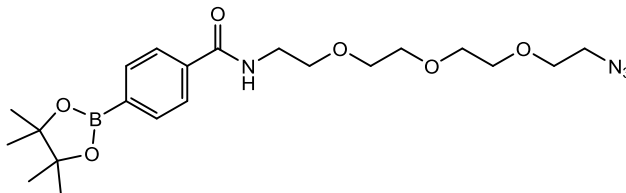

---

#### Synthesis of Dansyl-PEG<sub>2</sub>-Leucin Enkephalinamide (10) - Suzuki-Miyaura Cross-coupling

Preparation of the Pd catalyst was performed as described by Chalker *et al*<sup>2</sup>. Briefly, 2-amino-4,6-dihydropyrimidine disodium (7.6 mg, 44 μmol) was dissolved in 440 μL of water by stirring for 2 minutes in a water bath preheated to 65°C. To the resulting solution was added Pd(OAc)<sub>2</sub> (5.0 mg, 22 μmol). The mixture was stirred vigorously at 65°C for 30 minutes to give a homogenous yellow-orange solution. After cooling to room temperature, the stir bar was removed to give the catalyst stock solution 50 mM in Pd(II).

In a 1.5 mL Eppendorf tube, [mono-Iodo]-Leucine Enkephalinamide (1.0 mg, 1.50 μmol) was dissolved in 75 μL of water and 75 μL of dioxane before the addition of glycerol (50 μL), K<sub>2</sub>HPO<sub>4</sub> (1M aqueous stock solution, 45 μL, 45 μmol) and boronic pinacol ester-PEG<sub>2</sub>-Dansyl (**9**) (50 mM stock solution in dioxane, 45 μL, 2.25 μmol). Prior and after the addition of Pd(OAc)<sub>2</sub>.L<sub>2</sub> (50 mM aqueous stock solution, 75 μL, 3.75 μmol) the mixture was bubbled with argon for 10 minutes. The resulting solution was capped and stirred at 38°C for 12 hours on an Eppendorf Thermomixer (1300 rpm). The reaction was monitored by LC-MS. The crude mixture was quenched with 1 mL of a 1M HCl aqueous solution before being submitted to HPLC (purification performed on Agilent Zorbax Rx C18, gradient: see general methods). The collected fractions were lyophilized to afford the desired product Dansyl-PEG<sub>2</sub>-Leucine Enkephalinamide (0.55 mg, 0.53 μmol, 35 % yield).

**HRMS** (ESI-TOF) Calcd for C<sub>53</sub>H<sub>67</sub>N<sub>9</sub>O<sub>11</sub>S: 1038.4754; Found: 1038.4753.

**UPLC-MS** rt: 6.793 min (Gradient 1).

**Max Abs/Em** - / 506 nm (absorption <400 nm cannot be measured with our device)

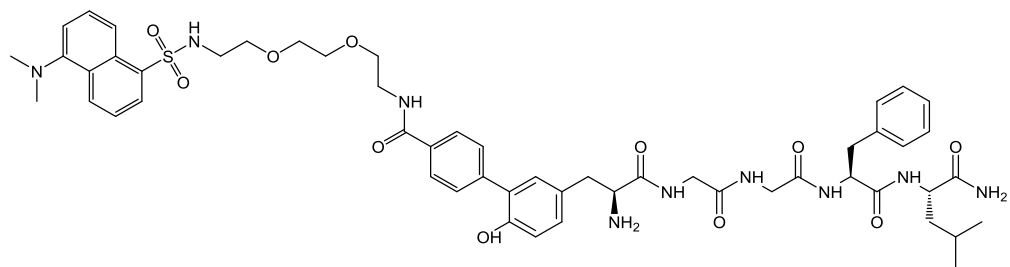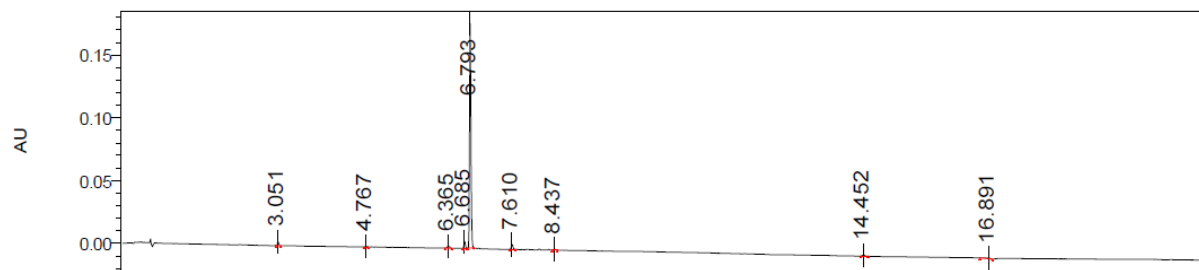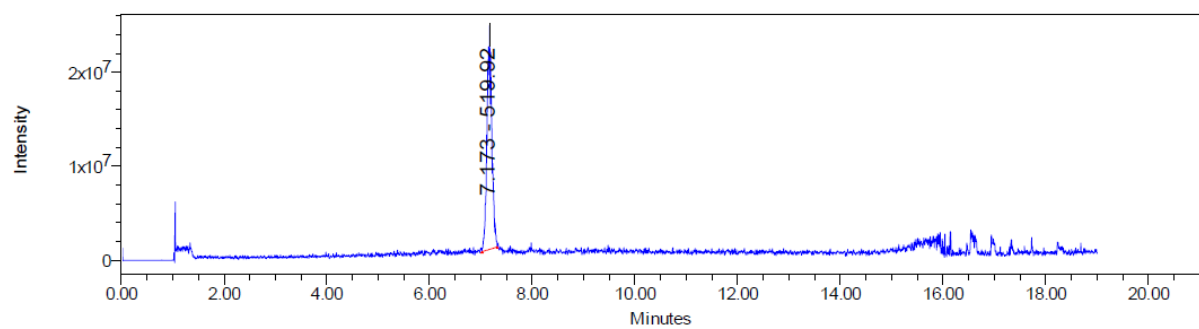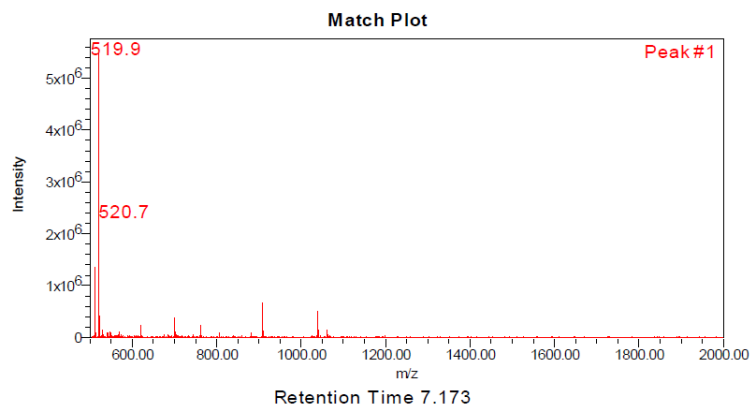

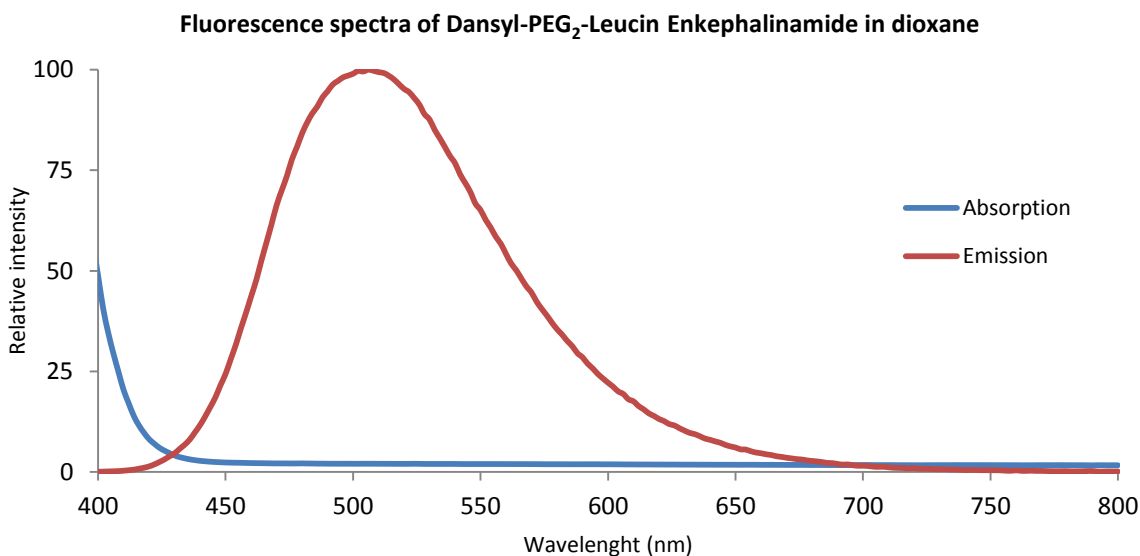

#### Synthesis of Azido-PEG<sub>3</sub>-ACP fragment (65-74) - Suzuki-Miyaura Cross-coupling

In a 1.5 mL Eppendorf tube, [mono-Iodo]-ACP fragment (65-74) (2.43 mg, 2.05  $\mu\text{mol}$ ) was dissolved in 100  $\mu\text{L}$  of water and 100  $\mu\text{L}$  of dioxane before the addition of glycerol (50  $\mu\text{L}$ ),  $\text{K}_2\text{HPO}_4$  (1M aqueous stock solution, 50  $\mu\text{L}$ , 50  $\mu\text{mol}$ ) and boronic pinacol ester-PEG<sub>3</sub>-azide (**12**) (50 mM stock solution in dioxane, 75  $\mu\text{L}$ , 3.75  $\mu\text{mol}$ ). Prior and after the addition of  $\text{Pd}(\text{OAc})_2 \cdot \text{L}_2$  (50 mM aqueous stock solution, 80  $\mu\text{L}$ , 4.0  $\mu\text{mol}$ ) the mixture was bubbled with argon for 10 minutes. The resulting solution was capped and stirred at 38  $^\circ\text{C}$  for 12 hours on an Eppendorf Thermomixer (1300 rpm). The reaction was monitored by LC-MS. The crude mixture was quenched with 1mL of a 1M HCl aqueous solution before being submitted to HPLC (purification performed on Agilent Zorbax Rx C18, gradient: see general methods). The collected fractions were lyophilized to afford the desired product Azido-PEG<sub>3</sub>- ACP fragment (65-74) (1.68 mg, 1.22  $\mu\text{mol}$ , 59 % yield).

**HRMS** (ESI-TOF) Calcd for  $\text{C}_{62}\text{H}_{95}\text{N}_{17}\text{O}_{19}$ : 1380.6917; Found: 1380.6899.

**UPLC-MS** rt: 4.950 min (Gradient 1).

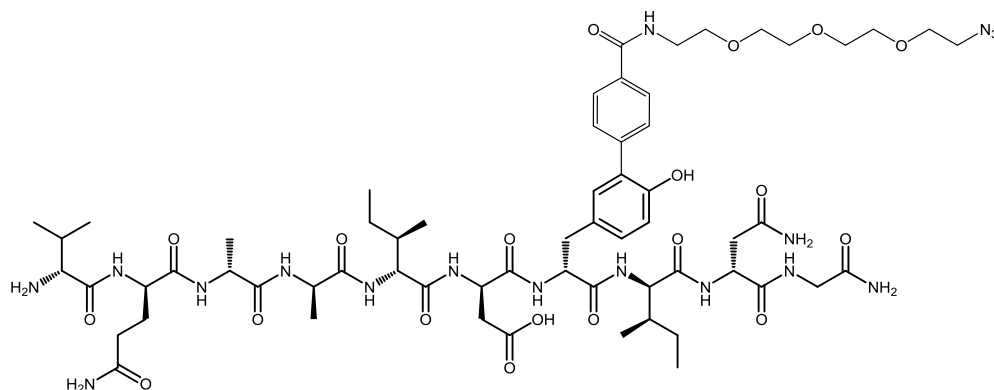



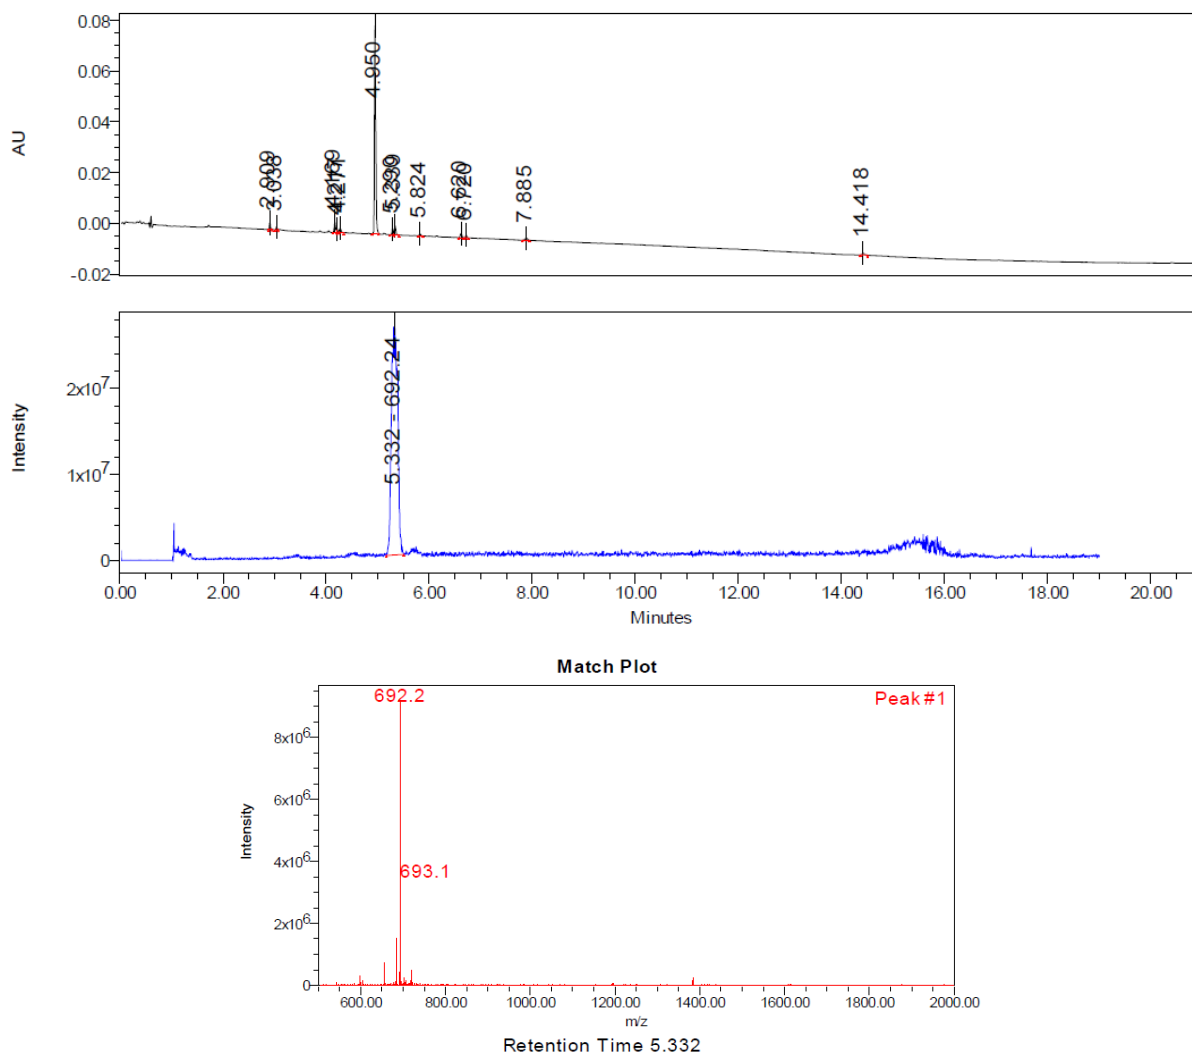

### Synthesis of Alexa Fluor 488-PEG<sub>3</sub>-ACP fragment (65-74) (13) – CuAAC

Azido-PEG<sub>3</sub>- ACP fragment (65-74) (1.68 mg, 1.22  $\mu\text{mol}$ ) was dissolved in 200  $\mu\text{L}$  of water and 100  $\mu\text{L}$  of tBuOH before the addition of Alkyne-Alexa Fluor 488 (1.0 mg, 1.29  $\mu\text{mol}$ ). Copper sulfate (50 mM stock solution in water, 3  $\mu\text{L}$ , 0.15  $\mu\text{mol}$ ), Cu-ligand THPTA<sup>3</sup> (200 mM stock solution in water, 3  $\mu\text{L}$ , 0.60  $\mu\text{mol}$ ) and ascorbic acid (100 mM stock solution in water, 7.5  $\mu\text{L}$ , 0.75  $\mu\text{mol}$ ) were premixed together before being added to the reaction mixture. The resulting solution was stirred at 38°C in a Thermomixer (1300 rpm) for 12 hours. The reaction was monitored by LC-MS. The crude mixture was dissolved in water/ACN before being submitted to HPLC (purification performed on Agilent Zorbax Rx C18, gradient: see general methods). The collected fractions were lyophilized to afford the desired product as an orange powder Alexa Fluor488-PEG<sub>3</sub>-ACP fragment (65-74) (1.48 mg, 0.76  $\mu\text{mol}$ , 62 % yield).

**HRMS** (ESI-TOF) Calcd for C<sub>86</sub>H<sub>112</sub>N<sub>20</sub>O<sub>29</sub>S<sub>2</sub> [M+2H]<sup>2+</sup> 977.8760; Found: 977.8803.

**UPLC-MS** rt: 5.009 min (Gradient 1).

**Max Abs/Em** 494/524 nm.

Retention Time 5.023

Fluorescence spectra of AF488-PEG<sub>3</sub>-ACP fragment (65-74) in PBS

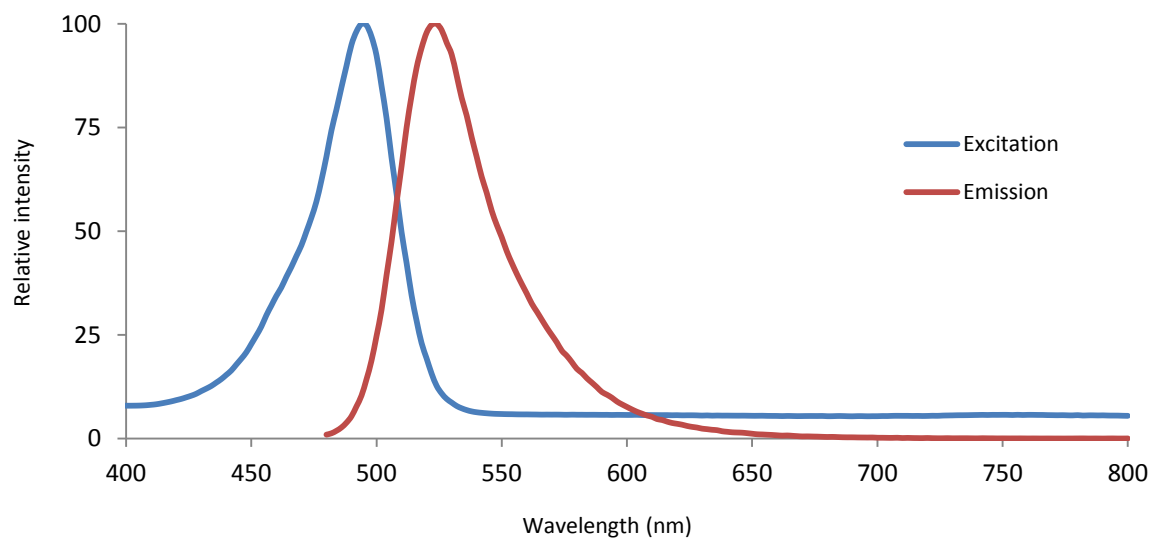

## NMR Spectra and proton assignment of mono-iodinated peptides

[mono-iodo] Leucine Enkephalinamide

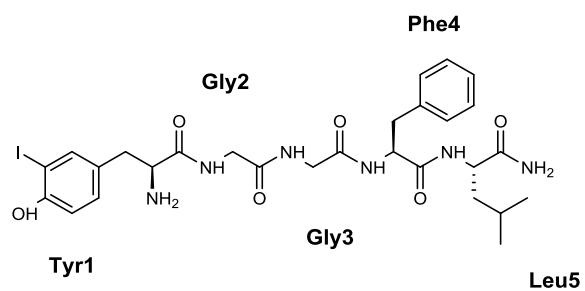

$^1\text{H}$  NMR (500 MHz,  $\text{d}_6\text{-DMSO}$ , 300 K) and  $^{13}\text{C}$  NMR (125 MHz,  $\text{d}_6\text{-DMSO}$ , 300 K).

|       |                   | $^1\text{H}$        | $^{13}\text{C}$ |
|-------|-------------------|---------------------|-----------------|
| Tyr-1 | $\text{NH}_3^+$   | broad               | -               |
|       | $\alpha$          | 3.46                | 55.77           |
|       | $\beta$           | 2.86/2.51           | 38.53           |
|       | $\gamma$          | -                   | 130.62          |
|       | $\delta 1$        | 7.53                | 139.22          |
|       | $\delta 2$        | 7.03                | 130.40          |
|       | $\epsilon 1$      | -                   | 84.36           |
|       | $\epsilon 2$      | 6.78                | 114.64          |
|       | $\zeta$           | -                   | 155.08          |
|       | $\zeta\text{-OH}$ | $\sim 10.1$ (broad) | -               |
|       | $\text{C}'$       | -                   | 173.76          |
| Gly-2 | NH                | 8.30                | -               |
|       | $\alpha$          | 3.73                | 42.02           |
|       | $\text{C}'$       | -                   | 169.10          |
| Gly-3 | NH                | 8.12                | -               |
|       | $\alpha$          | 3.73/3.61           | 41.90           |

|       |                 |           |        |
|-------|-----------------|-----------|--------|
|       | C'              | -         | 168.75 |
| Phe-4 | NH              | 8.08      | -      |
|       | $\alpha$        | 4.50      | 54.09  |
|       | $\beta$         | 3.04/2.80 | 37.28  |
|       | $\gamma$        | -         | 137.78 |
|       | $\delta$        | 7.25      | 129.17 |
|       | $\epsilon$      | 7.25      | 128.04 |
|       | $\zeta$         | 7.18      | 126.26 |
|       | C'              | -         | 170.69 |
| Leu-5 | NH              | 7.95      | -      |
|       | $\alpha$        | 4.20      | 50.99  |
|       | $\beta$         | 1.47      | 40.80  |
|       | $\gamma$        | 1.57      | 24.19  |
|       | $\delta$        | 0.88      | 23.02  |
|       | $\delta'$       | 0.83      | 21.56  |
|       | C'              | -         | 173.88 |
|       | NH <sub>2</sub> | 7.08/6.97 | -      |

Current Data Parameters  
 NAME FFC.IZJ1.174.1  
 EXPNO 1  
 PROCNO 1

FFC.IZJ1.174.1 in DMSO at 300K.

F2 - Acquisition Parameters  
 Date\_ 20160620  
 Time 15.30  
 INSTRUM spect  
 PROBHD 5 mm CPTCI 1H-  
 PULPROG zgpg30  
 TD 65536  
 SOLVENT DMSO  
 NS 16  
 DS 0  
 SWH 12500.000 Hz  
 FIDRES 0.190735 Hz  
 AQ 2.6214399 sec  
 RG 64  
 DW 40.000 usec  
 DE 10.00 usec  
 TE 300.0 K  
 CNST7 54.0000000  
 D1 2.00000000 sec  
 F1 8.95 usec  
 TD0 1

===== CHANNEL f1 =====  
 SFO1 500.3045027 MHz  
 NUC1 1H  
 P60 5.37 usec  
 PLW1 6.30959988 W

F2 - Processing parameters  
 SI 131072  
 SF 500.3000042 MHz  
 WDW no  
 SSB no  
 LB 0 Hz  
 GB 0  
 PC 1.00

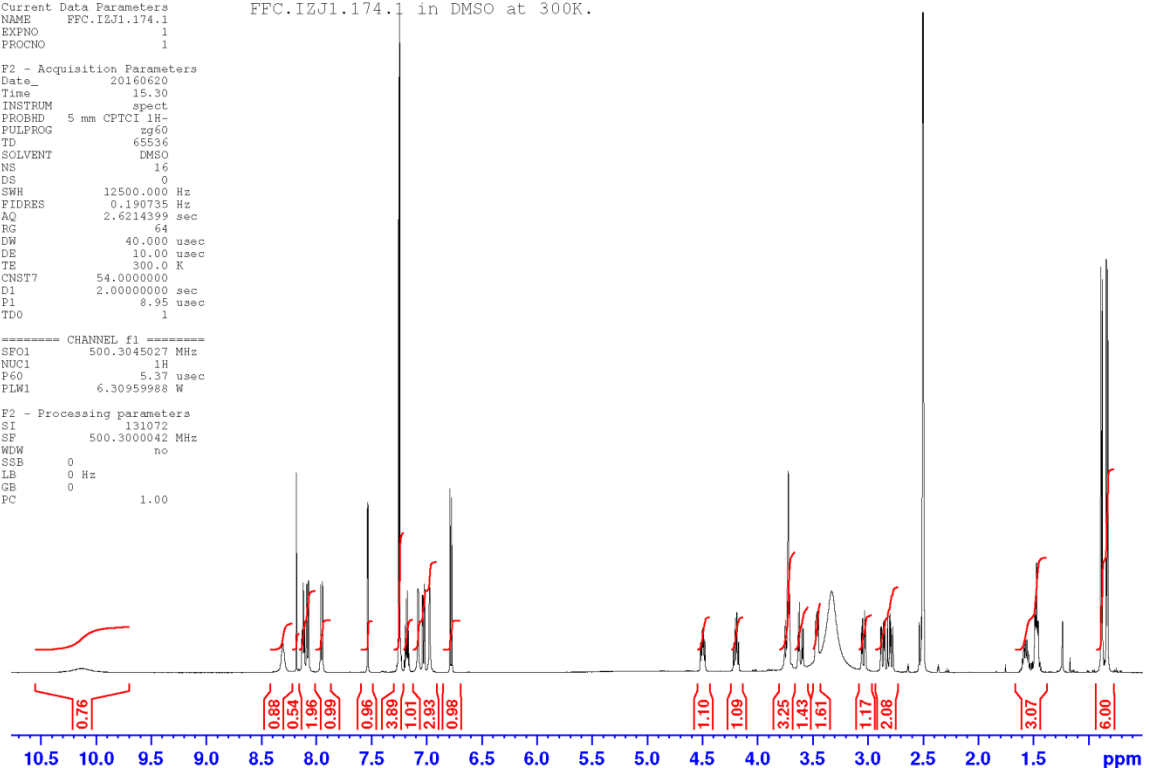

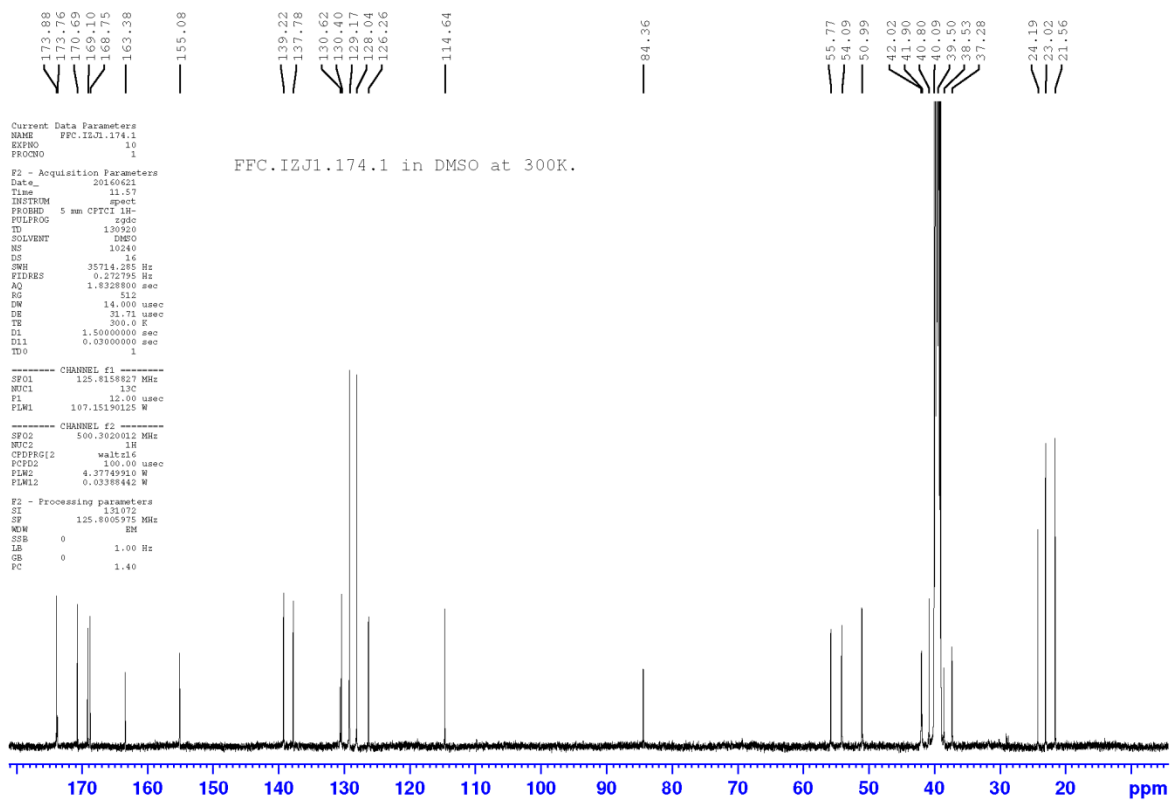

### Cyclo(RGD[mono-iodo]yK)

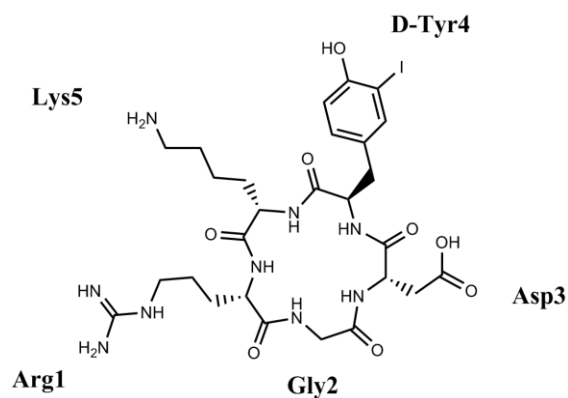

$^1\text{H}$  NMR (700 MHz,  $d_6$ -DMSO, 308 K) and  $^{13}\text{C}$  NMR (175 MHz,  $d_6$ -DMSO, 308 K).

Chemical shifts are referenced to the solvent signals ( $^1\text{H}$ : 2.50 ppm,  $^{13}\text{C}$ : 39.50 ppm). At 308K a better dispersion of the amide signals (Asp-3 and Lys-5) has been obtained.

|                | <sup>1</sup> H | <sup>13</sup> C |
|----------------|----------------|-----------------|
| <b>Arg-1</b>   |                |                 |
| NH             | 7.61           | -               |
| α              | 4.16           | 51.84           |
| β              | 1.71/1.48      | 28.48           |
| γ              | 1.37           | 25.11           |
| δ              | 3.09           | 40.26           |
| ε              | 7.52           | -               |
| ζ              | -              | 156.61          |
| C'             | -              | 171.10          |
| <b>Gly-2</b>   |                |                 |
| NH             | 8.44           | -               |
| α              | 4.04/3.24      | 43.22           |
| C'             | -              | 169.45          |
| <b>Asp-3</b>   |                |                 |
| NH             | 8.09           | -               |
| α              | 4.64           | 48.81           |
| β              | 2.71/2.39      | 35.04           |
| γ              | (OH: ~12.2)    | 171.52          |
| C'             | -              | 169.93          |
| <b>D-Tyr-4</b> |                |                 |
| NH             | 8.00           | -               |
| α              | 4.34           | 54.51           |
| β              | 2.78/2.69      | 35.89           |
| γ              | -              | 129.81          |
| δ1             | 7.44           | 138.93          |



|                   |           |        |
|-------------------|-----------|--------|
| $\delta 2$        | 6.97      | 130.21 |
| $\varepsilon 1$   | -         | 84.14  |
| $\varepsilon 2$   | 6.77      | 114.61 |
| $\zeta$           | -         | 155.02 |
| $\zeta\text{-OH}$ | 10.10     | -      |
| $C'$              | -         | 170.54 |
| <b>Lys-5</b>      |           |        |
| NH                | 8.11      | -      |
| $\alpha$          | 3.94      | 54.38  |
| $\beta$           | 1.58/1.43 | 30.62  |
| $\gamma$          | 1.10      | 22.42  |
| $\delta$          | 1.46      | 26.41  |
| $\varepsilon$     | 2.71      | 38.62  |
| $\zeta$           | 7.69      | -      |
| $C'$              | -         | 171.82 |

Current Data Parameters  
NAME cyclo\_RGdyK\_I  
EXPNO 12  
PROCNO 1

Cyclo(RGdy(Iodo)K) in DMSO at 308K.  
3mm tube

F2 - Acquisition Parameters  
Date\_ 20160226  
Time 14.36  
INSTRUM spect  
PROBHD 5 mm CPTCI 1H-  
PULPROG zg  
TD 65536  
SOLVENT DMSO  
NS 32  
DS 0  
SWH 14005.603 Hz  
FIDRES 0.213709 Hz  
AQ 2.3396351 sec  
RG 128  
DW 35.700 usec  
DE 6.50 usec  
TE 308.0 K  
D1 2.00000000 sec  
TD0 1

----- CHANNEL f1 -----  
NUC1 1H  
P1 7.80 usec  
PL1 -5.30 dB  
PL1W 6.38353539 W  
SFO1 700.2056016 MHz

F2 - Processing parameters  
SI 131072  
SF 700.2000138 MHz  
WDW no  
SSB 0  
LB 0 Hz  
GB 0  
PC 1.00

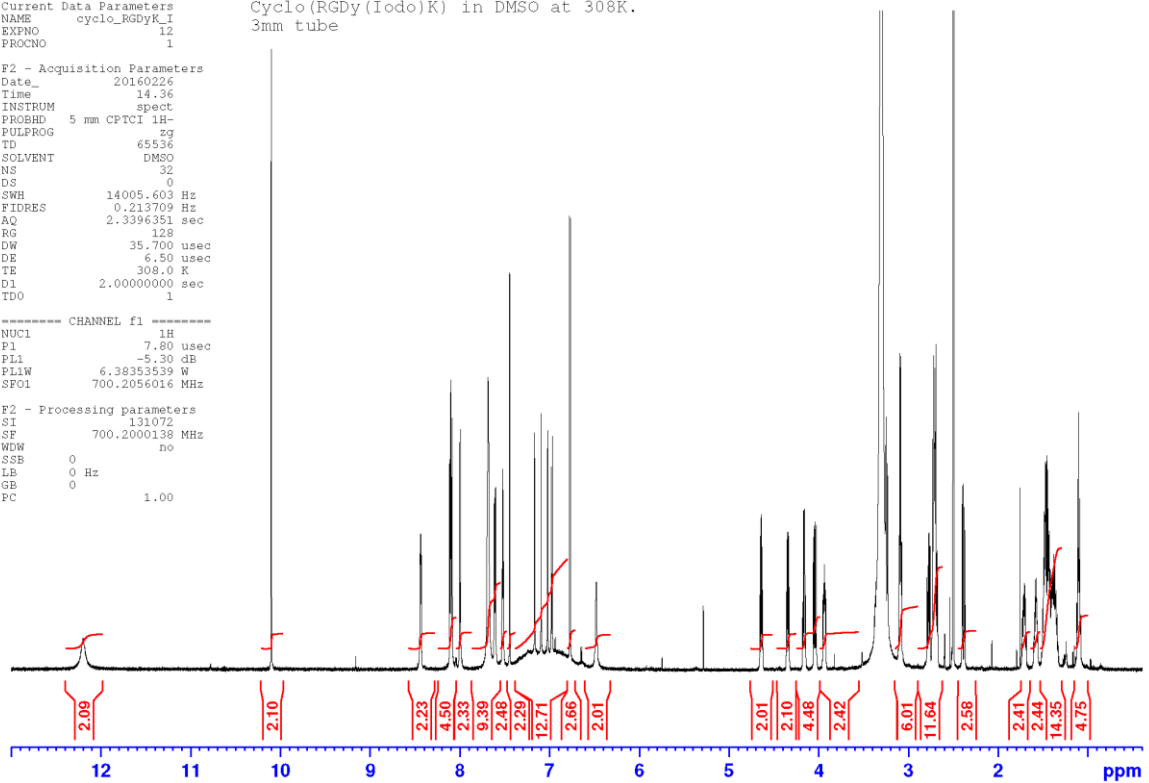

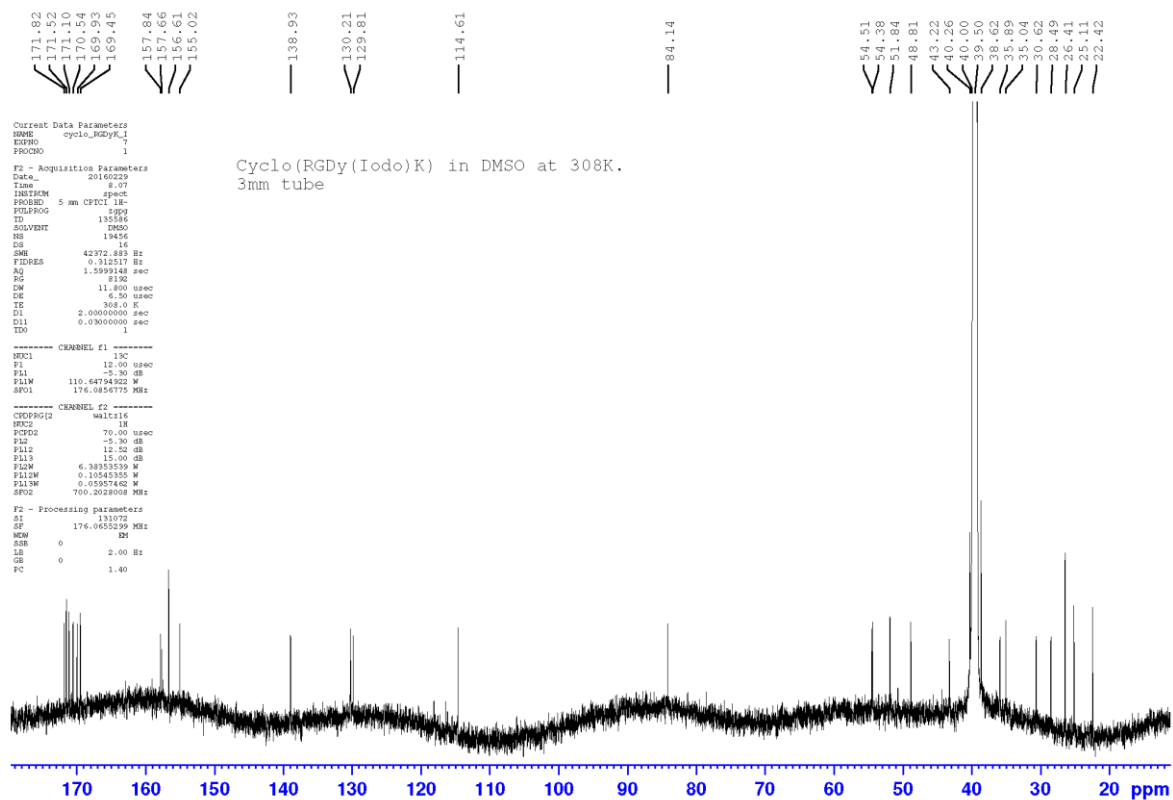

[mono-Iodo-Tyr<sup>0</sup>]-Bradykinin

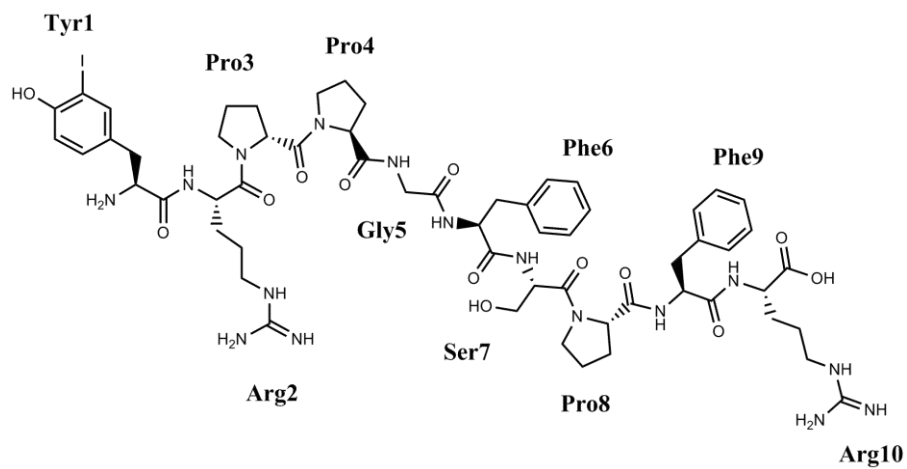

<sup>1</sup>H NMR (500 MHz, d<sub>6</sub>-DMSO, 300 K) and <sup>13</sup>C NMR (125 MHz, d<sub>6</sub>-DMSO, 300 K).

|                              | <sup>1</sup> H | <sup>13</sup> C |
|------------------------------|----------------|-----------------|
| <b>Tyr-1</b>                 |                |                 |
| NH <sub>3</sub> <sup>+</sup> | 8.08           | -               |
| α                            | 3.99           | 53.12           |
| β                            | 2.89/2.79      | 35.44           |
| γ                            | -              | 126.90          |
| δ1                           | 7.51           | 139.39          |
| δ2                           | 7.00           | 130.71          |
| ε1                           | -              | 84.78           |
| ε2                           | 6.78           | 114.66          |
| ζ                            | -              | 155.84          |
| ζ-OH                         | 10.31          | -               |
| C'                           | -              | 167.52          |
| <b>Arg-2</b>                 |                |                 |
| NH                           | 8.66           | -               |
| α                            | 4.49           | 49.98           |

|               |           |                        |
|---------------|-----------|------------------------|
| $\beta$       | 1.69/1.50 | 28.54                  |
| $\gamma$      | 1.53      | 24.41                  |
| $\delta$      | 3.08      | 40.47                  |
| $\varepsilon$ | 7.61      | -                      |
| $\zeta$       | -         | 156.73                 |
| C'            | -         | (a)                    |
| <b>Pro-3</b>  |           |                        |
| $\alpha$      | 4.58      | 57.63                  |
| $\beta$       | 2.18/1.84 | 27.87                  |
| $\gamma$      | 1.87      | 24.49                  |
| $\delta$      | 3.60/3.48 | 46.90                  |
| C'            | -         | 169.63                 |
| <b>Pro-4</b>  |           |                        |
| $\alpha$      | 4.26      | 59.44                  |
| $\beta$       | 2.00/1.81 | 29.05                  |
| $\gamma$      | 1.93/1.89 | 24.41                  |
| $\delta$      | 3.66/3.58 | 46.81                  |
| C'            | -         | 171.77                 |
| <b>Gly-5</b>  |           |                        |
| NH            | 7.96      | -                      |
| $\alpha$      | 3.63      | 41.67                  |
| C'            | -         | 168.48 (or 168.50) (a) |
| <b>Phe-6</b>  |           |                        |
| NH            | 7.93      | -                      |
| $\alpha$      | 4.57      | 53.38                  |
| $\beta$       | 2.96/2.73 | 37.68                  |

|               |           |            |
|---------------|-----------|------------|
| $\gamma$      | -         | 137.57     |
| $\delta$      | 7.19      | 129.13     |
| $\varepsilon$ | 7.24      | 128.02     |
| $\zeta$       | 7.18      | 126.29     |
| C'            | -         | 170.96 (b) |
| <b>Ser-7</b>  |           |            |
| NH            | 8.31      | -          |
| $\alpha$      | 4.58      |            |
| $\beta$       | 3.63      | 61.73      |
| $\beta$ -OH   | 5.36      | -          |
| C'            | -         | (a)        |
| <b>Pro-8</b>  |           |            |
| $\alpha$      | 4.30      | 59.60      |
| $\beta$       | 1.88/1.60 | 28.77      |
| $\gamma$      | 1.70/1.43 | 23.72      |
| $\delta$      | 3.61/3.51 | 46.90      |
| C'            | -         | 170.84     |
| <b>Phe-9</b>  |           |            |
| NH            | 7.70      | -          |
| $\alpha$      | 4.54      | 53.45      |
| $\beta$       | 3.08/2.72 | 37.23      |
| $\gamma$      | -         | 137.68     |
| $\delta$      | 7.24      | 129.10     |
| $\varepsilon$ | 7.24      | 127.97     |
| $\zeta$       | 7.18      | 126.26     |
| C'            | -         | 170.95 (b) |

|               |           |        |
|---------------|-----------|--------|
| <b>Arg-10</b> |           |        |
| NH            | 8.13      | -      |
| $\alpha$      | 4.20      | 51.46  |
| $\beta$       | 1.79/1.64 | 28.09  |
| $\gamma$      | 1.51      | 25.06  |
| $\delta$      | 3.12      | 40.27  |
| $\epsilon$    | 7.56      | -      |
| $\zeta$       | -         | 156.65 |
| C'            | -         | 173.08 |

- (a) Could not be assigned  
(b) Might be interchanged

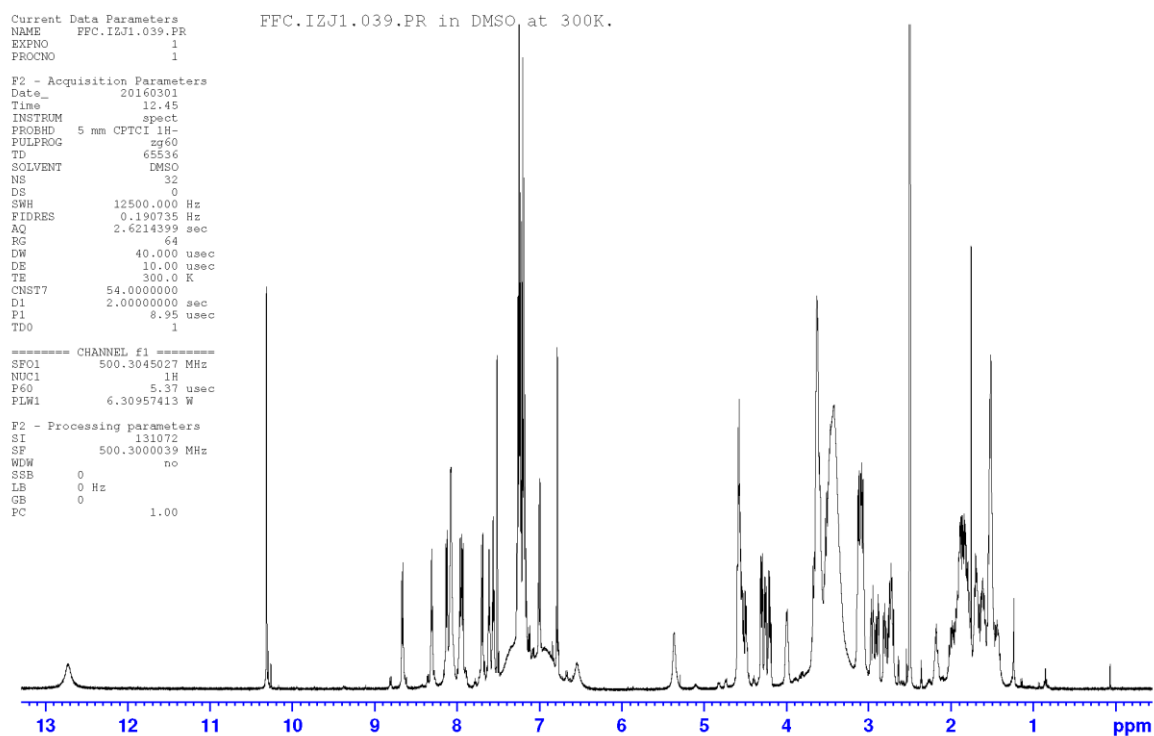

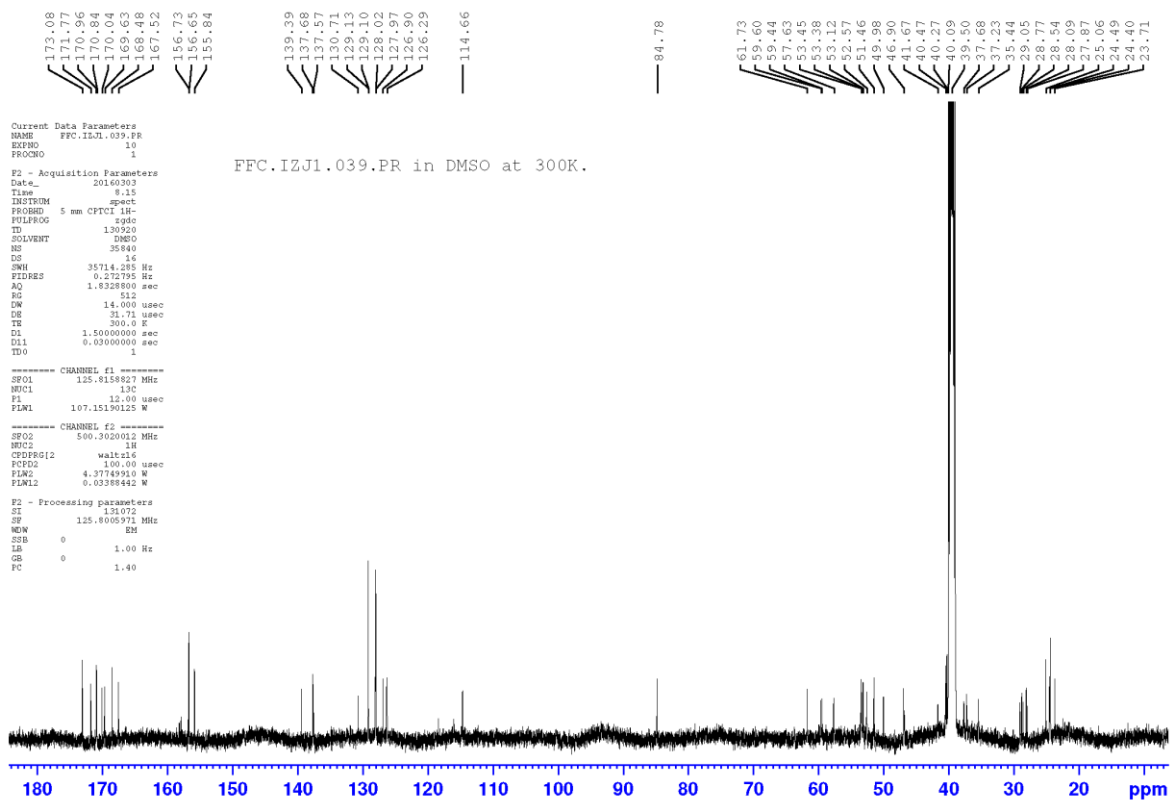



[mono-Iodo]-Angiotensin III

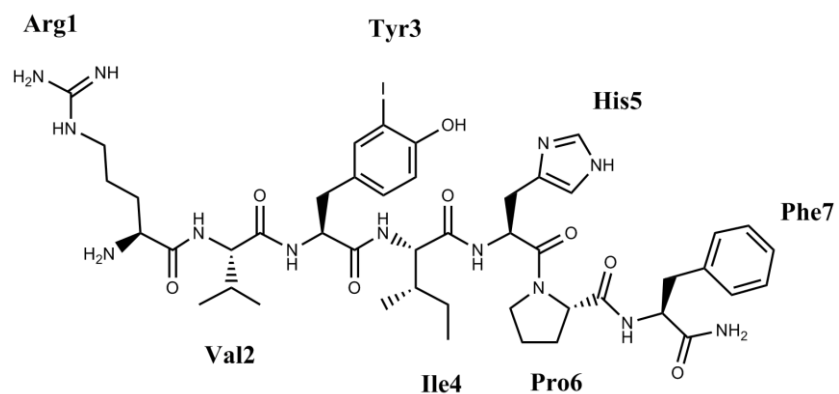

$^1\text{H}$  NMR (500 MHz,  $\text{d}_6\text{-DMSO}$ , 300 K) and  $^{13}\text{C}$  NMR (125 MHz,  $\text{d}_6\text{-DMSO}$ , 300 K).

|                 | $^1\text{H}$ | $^{13}\text{C}$ |
|-----------------|--------------|-----------------|
| <b>Arg-1</b>    |              |                 |
| $\text{NH}_3^+$ | 8.12         | -               |
| $\alpha$        | 3.87         | 51.72           |
| $\beta$         | 1.64         | 28.62           |
| $\gamma$        | 1.46         | 24.28           |
| $\delta$        | 3.09         | 40.12           |
| $\epsilon$      | 7.60         | -               |
| $\zeta$         | -            | 156.71          |
| $\text{C}'$     | -            | 168.22          |
| <b>Val-2</b>    |              |                 |
| NH              | 8.35         | -               |
| $\alpha$        | 4.27         | 57.12           |
| $\beta$         | 2.02         | 31.11           |
| $\gamma$        | 0.84         | 19.19           |
| $\gamma'$       | 0.79         | 17.57           |

|              |           |                |
|--------------|-----------|----------------|
| C'           | -         | 170.48         |
| <b>Tyr-3</b> |           |                |
| NH           | 8.10      | -              |
| $\alpha$     | 4.50      | 53.93          |
| $\beta$      | 2.77/2.59 | 35.77          |
| $\gamma$     | -         | 130.29         |
| $\delta 1$   | 7.60      | 138.97         |
| $\delta 2$   | 7.09      | 130.36         |
| $\epsilon 1$ | -         | 84.27          |
| $\epsilon 2$ | 6.75      | 114.41         |
| $\zeta$      | -         | 155.02         |
| $\zeta$ -OH  | 10.17     | -              |
| C'           | -         | 170.97         |
| <b>Ile-4</b> |           |                |
| NH           | 8.00      | -              |
| $\alpha$     | 4.15      | 56.65          |
| $\beta$      | 1.66      | 36.62          |
| $\beta$ -Me  | 0.75      | 15.19          |
| $\gamma$     | 1.36/1.05 | 24.10          |
| $\delta$     | 0.77      | 10.85          |
| C'           | -         | 170.85         |
| <b>His-5</b> |           |                |
| NH           | 8.41      | -              |
| $\alpha$     | 4.79      | ~ 47.7 (broad) |
| $\beta$      | 3.05/2.93 | ~ 26.3 (broad) |
| $\gamma$     | -         | (a)            |

|                             |                          |                      |
|-----------------------------|--------------------------|----------------------|
| $\delta$                    | 7.38 (broad)             | $\sim 117.1$ (broad) |
| $\varepsilon$               | $\sim 8.9$ (very broad)  | $\sim 133.8$ (broad) |
| $\varepsilon\text{-NH}_2^+$ | $\sim 14.2$ (broad)      | -                    |
| $C'$                        | -                        | (a)                  |
| <b>Pro-3</b>                |                          |                      |
| $\alpha$                    | 4.26                     | 59.87                |
| $\beta$                     | 1.98/1.69                | 29.13                |
| $\gamma$                    | 1.77                     | 24.25                |
| $\delta$                    | 3.63/3.46                | 46.99                |
| $C'$                        | -                        | 171.43               |
| <b>Phe-9</b>                |                          |                      |
| NH                          | $\sim 8.01$ (very broad) | -                    |
| $\alpha$                    | 4.38                     | 53.83                |
| $\beta$                     | 3.05/2.85                | 37.01                |
| $\gamma$                    | -                        | 137.88               |
| $\delta$                    | 7.23                     | 129.17               |
| $\varepsilon$               | 7.23                     | 128.00               |
| $\zeta$                     | 7.17                     | 126.20               |
| $C'$                        | -                        | 172.55               |
| $\text{NH}_2$               | 7.26/7.09                | -                    |

(a) Could not be assigned due to extreme line broadening

Current Data Parameters  
NAME FFC.IZJ1.046.PR  
EXPNO 1  
PROCNO 1

FFC.IZJ1.046.PR in DMSO at 300K

F2 - Acquisition Parameters  
Date\_ 20160308  
Time 13.02  
INSTRUM spect  
PROBHD 5 mm CPTCI 1H-  
PULPROG zgpg30  
TD 65536  
SOLVENT DMSO  
NS 16  
DS 0  
SWH 12500.000 Hz  
FIDRES 0.190735 Hz  
AQ 2.6214399 sec  
RG 64  
DM 40.000 usec  
DE 10.00 usec  
TE 300.0 K  
CNST7 54.0000000  
D1 2.00000000 sec  
F1 8.95 usec  
TD0 1

===== CHANNEL f1 =====  
SFO1 500.3045027 MHz  
NUC1 1H  
P60 5.37 usec  
PLW1 6.30957413 W

F2 - Processing parameters  
SI 131072  
SF 500.300045 MHz  
WDW no  
SSB 0  
LB 0 Hz  
GB 0  
PC 1.00

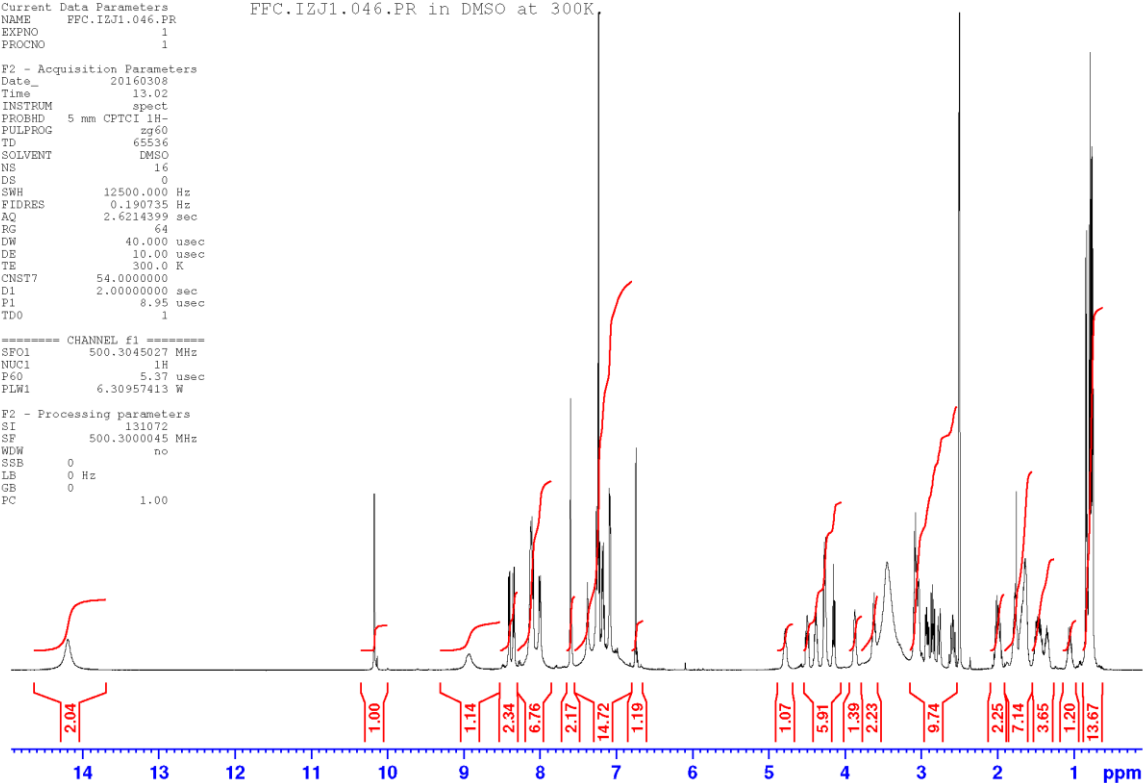

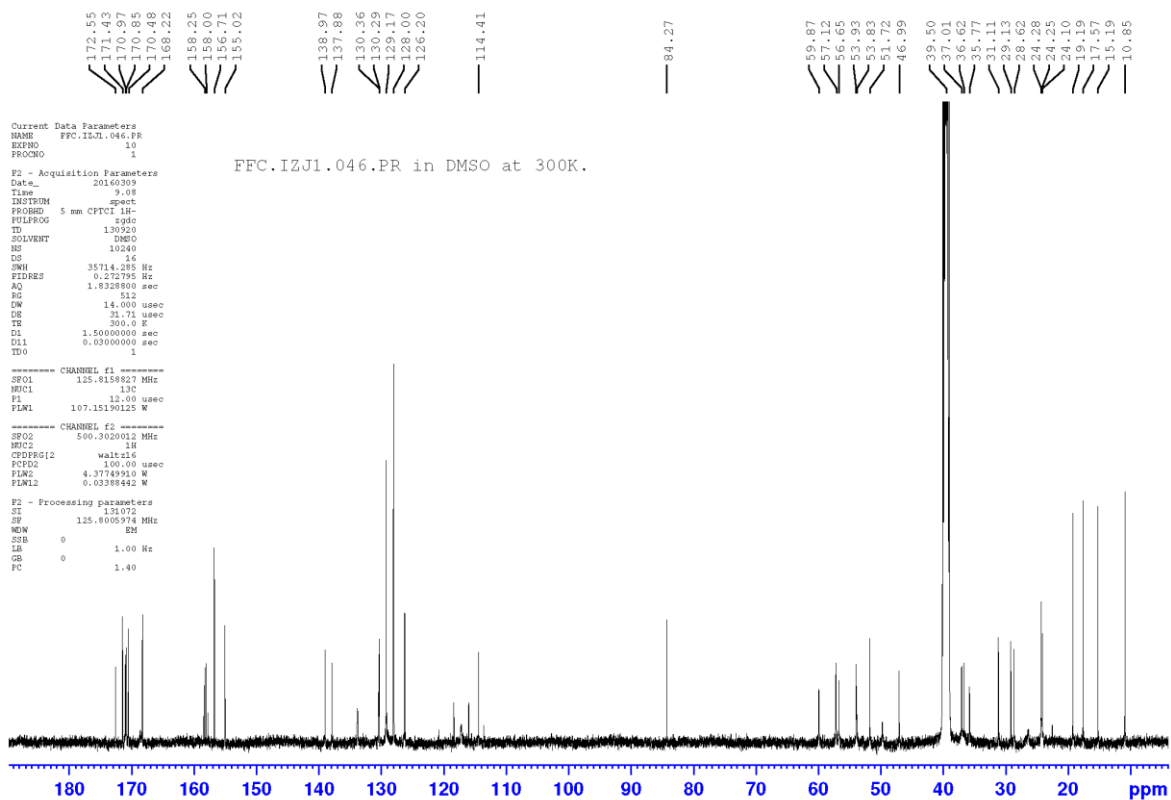

**[mono-Iodo]-ACP fragment 65-74**

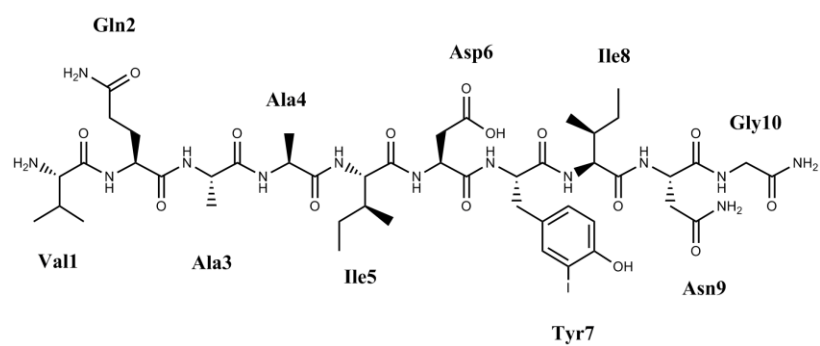

$^1\text{H}$  NMR (500 MHz,  $\text{d}_6\text{-DMSO}$ , 295 K) and  $^{13}\text{C}$  NMR (125 MHz,  $\text{d}_6\text{-DMSO}$ , 295 K).

|       |                      | $^1\text{H}$ | $^{13}\text{C}$ |
|-------|----------------------|--------------|-----------------|
| Val-1 | $\text{NH}_3^+$      | 8.04         | -               |
|       | $\alpha$             | 3.60         | 57.25           |
|       | $\beta$              | 2.03         | 29.89           |
|       | $\gamma$             | 0.92         | 18.33           |
|       | $\gamma'$            | 0.91         | 17.70           |
|       | $\text{C}'$          | -            | 167.63          |
| Gln-2 | NH                   | 8.53         | -               |
|       | $\alpha$             | 4.33         | 52.07           |
|       | $\beta$              | 1.87/1.76    | 28.02           |
|       | $\gamma$             | 2.13         | 31.29           |
|       | $\delta$             | -            | 173.73          |
|       | $\delta\text{-NH}_2$ | 7.29/6.84    | -               |
|       | $\text{C}'$          | -            | 170.29          |
| Ala-3 | NH                   | 8.18         | -               |
|       | $\alpha$             | 4.28         | 47.97           |
|       | $\beta$              | 1.18         | 18.22           |
|       | $\text{C}'$          | -            | 171.86          |

|       |             |           |        |
|-------|-------------|-----------|--------|
| Ala-4 | NH          | 8.11      | -      |
|       | $\alpha$    | 4.32      | 48.02  |
|       | $\beta$     | 1.17      | 17.79  |
|       | C'          | -         | 171.91 |
| Ile-5 | NH          | 7.69      | -      |
|       | $\alpha$    | 4.13      | 56.60  |
|       | $\beta$     | 1.65      | 36.99  |
|       | $\beta$ -Me | 0.73      | 15.27  |
|       | $\gamma$    | 1.35/1.00 | 24.01  |
|       | $\delta$    | 0.76      | 11.11  |
|       | C'          | -         | 170.60 |
| Asp-6 | NH          | 8.17      | -      |
|       | $\alpha$    | 4.51      | 49.54  |
|       | $\beta$     | 2.62/2.43 | 36.27  |
|       | $\gamma$    | -         | 171.65 |
|       | C'          | -         | 170.47 |

The amide protons of Ala3 and Asp6 overlap at 300K.

Current Data Parameters  
NAME FFC.IZJ1.044.PR  
EXPNO 1  
PROCNO 1

FFC.IZJ1.044.PR in DMSO at 300K.

F2 - Acquisition Parameters  
Date\_ 20160309  
Time 13.06  
INSTRUM spect  
PROBHD 5 mm CPTCI 1H-  
PULPROG zg60  
TD 65536  
SOLVENT DMSO  
NS 16  
DS 0  
SWH 12500.000 Hz  
FIDRES 0.190735 Hz  
AQ 2.6214399 sec  
RG 64  
DM 40.000 usec  
DE 10.00 usec  
TE 295.0 K  
CNST7 54.0000000  
D1 2.00000000 sec  
F1 8.95 usec  
TD0 1

===== CHANNEL f1 =====  
SFO1 500.3045027 MHz  
NUC1 1H  
P60 5.37 usec  
PLW1 6.30957413 W

F2 - Processing parameters  
SI 131072  
SF 500.3000046 MHz  
WDW no  
SSB 0  
LB 0 Hz  
GB 0  
PC 1.00

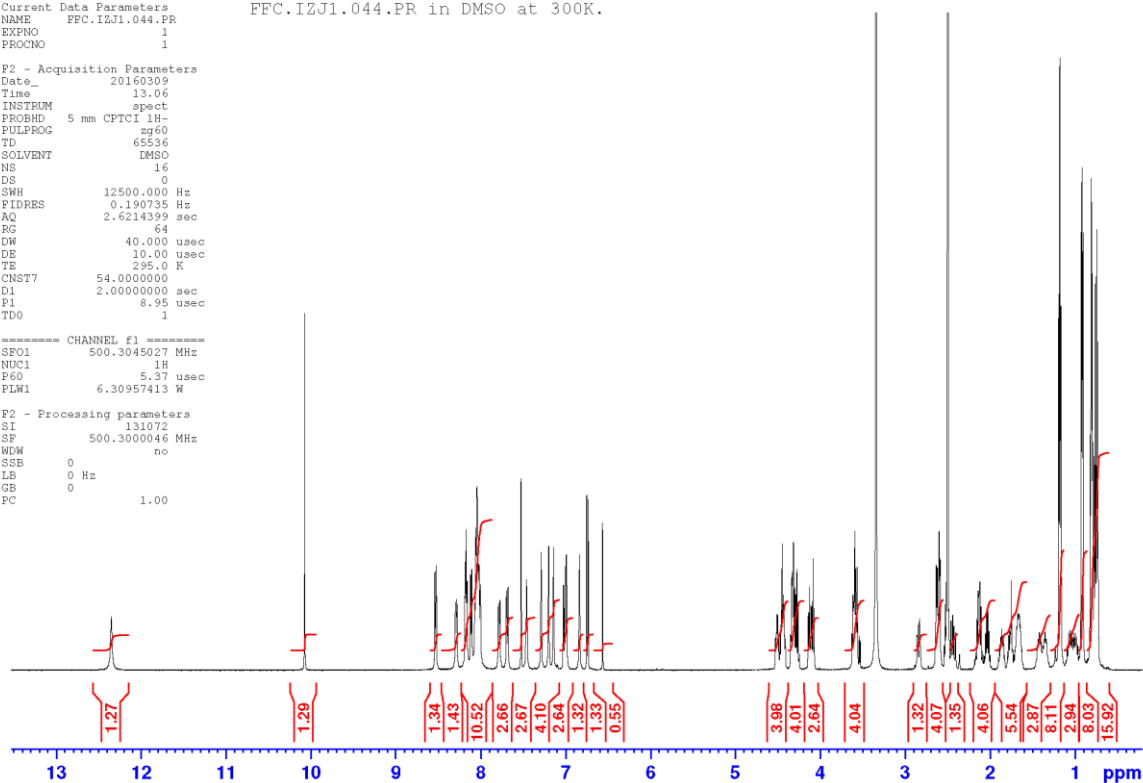



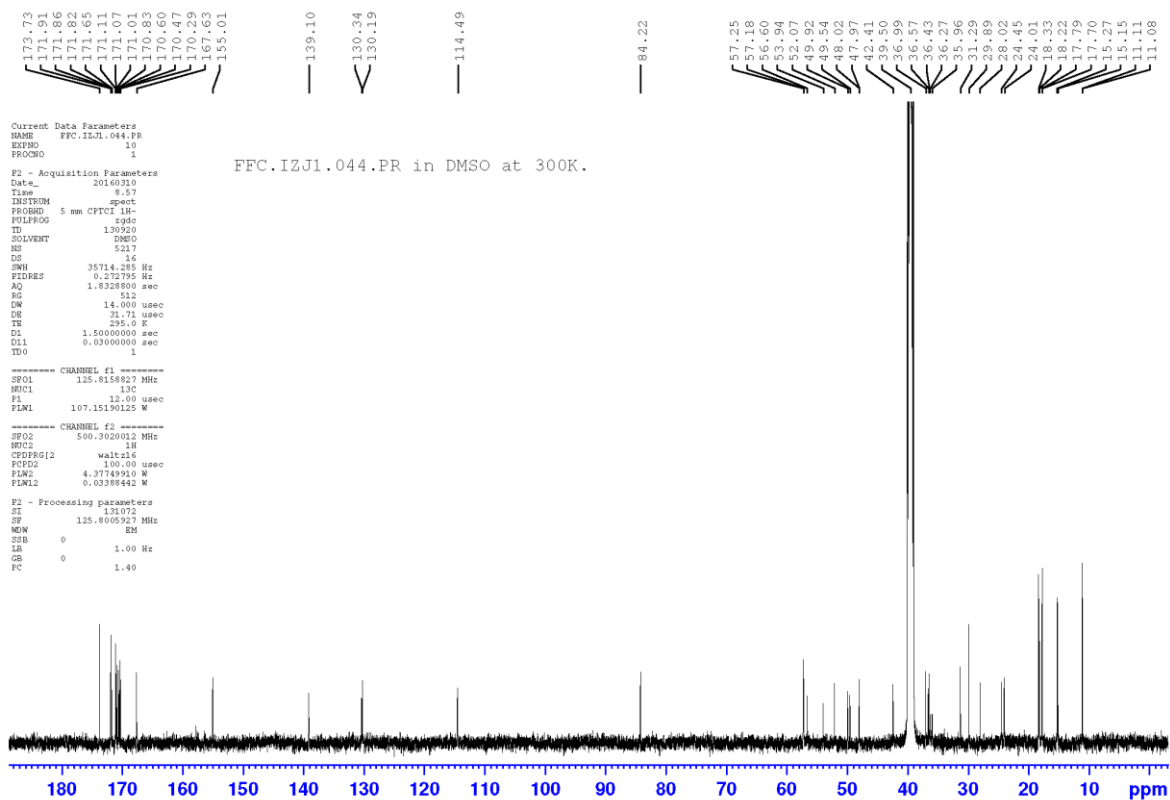

[mono-Iodo-Tyr<sup>8</sup>]-Substance P

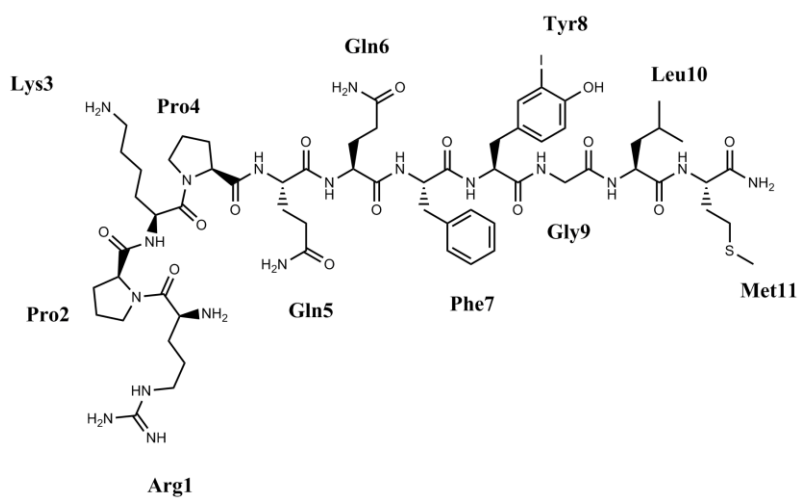

<sup>1</sup>H NMR (700 MHz, d<sub>6</sub>-DMSO, 295 K) and <sup>13</sup>C NMR (175 MHz, d<sub>6</sub>-DMSO, 295 K).

|       |                              | <sup>1</sup> H | <sup>13</sup> C |
|-------|------------------------------|----------------|-----------------|
| Arg-1 | NH <sub>3</sub> <sup>+</sup> | 8.18           | -               |
|       | α                            | 4.16           | 50.48 (a)       |
|       | β                            | 1.76/1.70      | 27.11           |
|       | γ                            | 1.62           | 23.62           |
|       | δ                            | 3.13           | 40.22           |
|       | ε                            | 7.69           | -               |
|       | ζ                            | -              | 156.79          |
| Pro-2 | C'                           | -              | 166.84          |
|       | α                            | 4.43           | 59.24           |
|       | β                            | 2.11/1.75      | 29.22           |
|       | γ                            | 1.91/1.83      | 24.66           |
|       | δ                            | 3.70/3.46      | 47.04           |
| Lys-3 | C'                           | -              | 170.98          |
|       | NH                           | 8.31           | -               |
|       | α                            | 4.43           | 50.43 (a)       |

|       |                 |           |        |
|-------|-----------------|-----------|--------|
|       | $\beta$         | 1.70/1.51 | 30.12  |
|       | $\gamma$        | 1.39      | 21.84  |
|       | $\delta$        | 1.54      | 26.56  |
|       | $\epsilon$      | 2.75      | 38.58  |
|       | $\zeta$         | 7.77      | -      |
|       | C'              | -         | 170.38 |
| Pro-4 | $\alpha$        | 4.30      | 59.83  |
|       | $\beta$         | 2.09/1.82 | 29.03  |
|       | $\gamma$        | 1.92/1.85 | 24.66  |
|       | $\delta$        | 3.60/3.57 | 46.88  |
|       | C'              | -         | 172.04 |
| Gln-5 | NH              | 8.27      | -      |
|       | $\alpha$        | 4.12      | 52.80  |
|       | $\beta$         | 1.85/1.73 | 27.39  |
|       | $\gamma$        | 2.12      | 31.48  |
|       | $\delta$        | -         | 174.24 |
|       | NH <sub>2</sub> | 7.32/6.87 | -      |
|       | C'              | -         | 174.24 |
| Gln-6 | NH              | 7.85      | -      |
|       | $\alpha$        | 4.15      | 52.30  |
|       | $\beta$         | 1.81/1.71 | 27.90  |
|       | $\gamma$        | 2.04      | 31.57  |
|       | $\delta$        | -         | 174.19 |
|       | NH <sub>2</sub> | 7.33/6.87 | -      |
|       | C'              | -         | 170.87 |
| Phe-7 | NH              | 7.97      | -      |

|        |                 |           |        |
|--------|-----------------|-----------|--------|
|        | $\alpha$        | 4.42      | 54.13  |
|        | $\beta$         | 2.93/2.74 | 37.50  |
|        | $\gamma$        | -         | 137.59 |
|        | $\delta$        | 7.15      | 129.11 |
|        | $\varepsilon$   | 7.19      | 128.04 |
|        | $\zeta$         | 7.14      | 126.20 |
|        | C'              | -         | 170.92 |
| Tyr8   | NH              | 8.03      | -      |
|        | $\alpha$        | 4.42      | 54.29  |
|        | $\beta$         | 2.90/2.67 | 36.18  |
|        | $\gamma$        | -         | 130.22 |
|        | $\delta 1$      | 7.58      | 139.21 |
|        | $\delta 2$      | 7.08      | 130.33 |
|        | $\varepsilon 1$ | -         | 84.28  |
|        | $\varepsilon 2$ | 6.77      | 114.63 |
|        | $\zeta$         | -         | 155.10 |
|        | $\zeta$ -OH     | 10.09     | -      |
|        | C'              | -         | 171.30 |
| Gly-9  | NH              | 8.23      | -      |
|        | $\alpha$        | 3.73      | 41.99  |
|        | C'              | -         | 168.64 |
| Leu-10 | NH              | 8.02      | -      |
|        | $\alpha$        | 4.29      | 51.21  |
|        | $\beta$         | 1.47      | 40.70  |
|        | $\gamma$        | 1.61      | 24.12  |
|        | $\delta$        | 0.88      | 23.13  |

|        |           |           |        |
|--------|-----------|-----------|--------|
|        | $\delta'$ | 0.84      | 21.59  |
|        | $C'$      | -         | 171.93 |
| Met-11 | NH        | 7.98      | -      |
|        | $\alpha$  | 4.23      | 51.76  |
|        | $\beta$   | 1.92/1.81 | 31.59  |
|        | $\gamma$  | 2.45/2.38 | 29.70  |
|        | $\delta$  | 2.02      | 14.65  |
|        | $C'$      | -         | 173.08 |
|        | $NH_2$    | 7.21/7.07 | -      |

(a) Might be interchanged

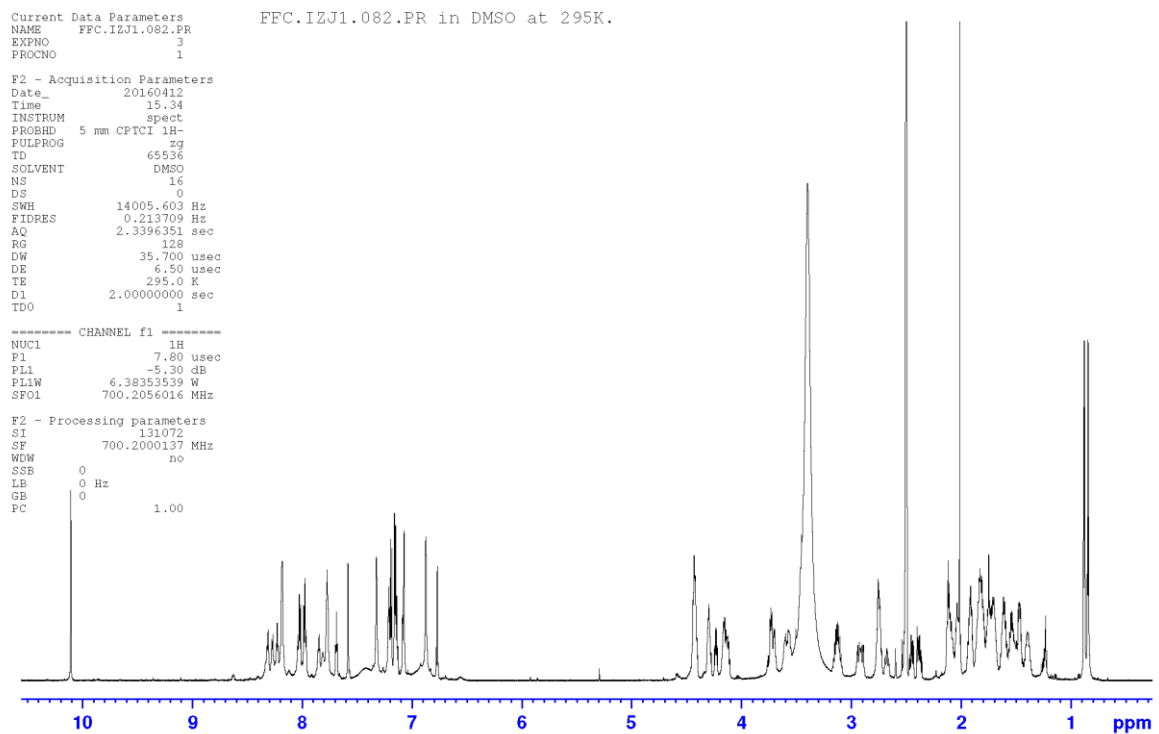

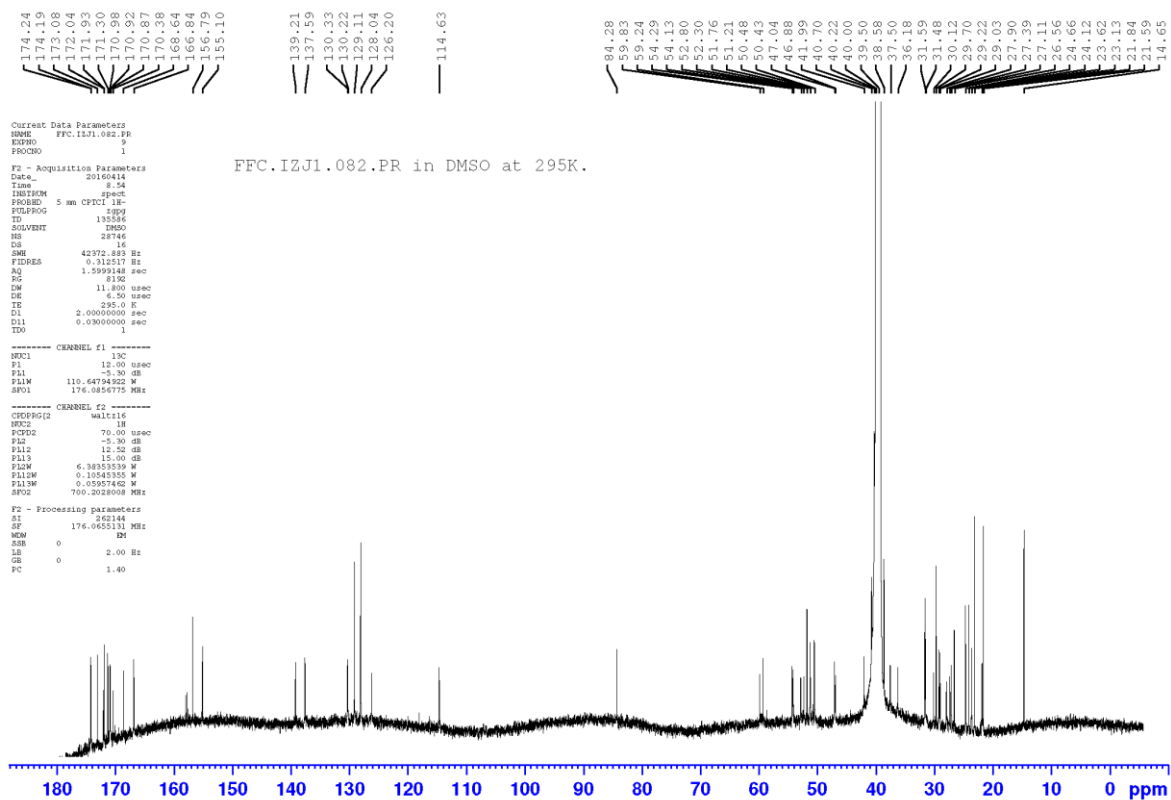

## Supporting References

1. J. M. Collins, K. A. Porter, S. K. Singh and G. S. Vanier, *Organic letters*, 2014, **16**, 940-943.
2. J. M. Chalker, C. S. Wood and B. G. Davis, *J. Am. Chem. Soc.*, 2009, **131**, 16346-16347.
3. V. Hong, S. I. Presolski, C. Ma and M. Finn, *Angewandte Chemie International Edition*, 2009, **48**, 9879-9883.
